# Supplementary material for: Whole Transcriptome Sequencing Reveals Gene Expression and Splicing Differences in Brain Regions Affected by Alzheimer's Disease
Source: PLoS One. 2011 Jan 21;6(1):e16266. doi: 10.1371/journal.pone.0016266 (PMC3025006; doi:10.1371/journal.pone.0016266)
Supplement: Table S1 — Top 30 up and top 30 down regulated genes in AD total brain. Differential gene expression for total brain was calculated using the ratio of AD versus normal FPKM values for every gene identified as expressed by Cufflinks. The genes were ranked on this ratio (fold change), and those with the 30 highest and 30 lowest fold change values are shown here. (XLSX) [file pone.0016266.s001.xlsx]

## Sheet: Table1 -total_top30
Table S1. Top 30 up and top 30 down regulated genes in AD total brain.
GENE	CHROMOSOME	FPKM NORM	FPKM AD	TEST STAT	FOLD CHANGE	P VALUE	significant (after FDR)
IGHA1	chr14	0.234092	5.27536	3.73868	22.5354	0.00018499	yes
RP11-552E20.3	chr6	1.87539	14.2722	5.75307	7.61025	8.7635e-09	yes
PCYT1A	chr3	0.413637	3.02196	2.65156	7.30582	0.00801203	yes
SLC7A9	chr19	0.705822	4.83433	2.55606	6.84921	0.0105864	yes
RAD54L	chr1	0.436495	2.39172	2.22712	5.47937	0.0259394	yes
OAS1	chr12	3.82773	20.9735	5.4553	5.47937	4.88893e-08	yes
MTIF2	chr2	3.75753	16.177	4.96127	4.30522	7.00349e-07	yes
STAB1	chr3	0.729626	2.88736	2.1476	3.95732	0.0317452	yes
CD22	chr19	9.83818	36.8837	12.6526	3.74904	0	yes
AC018730.1	chr2	9.4161	32.9079	8.03433	3.49485	8.88178e-16	yes
RBM6	chr3	14.3402	49.546	8.54106	3.45504	0	yes
ANKRD18A	chr9	5.26774	18.1415	5.16881	3.44389	2.35593e-07	yes
XAF1	chr17	2.38659	8.17314	2.18752	3.42461	0.0287046	yes
PLOD3	chr7	13.0263	43.2221	10.0759	3.31806	0	yes
LY6H	chr8	58.0765	177.169	22.1832	3.05061	0	yes
IFI35	chr17	3.41493	9.80136	2.42969	2.87015	0.0151116	yes
IFI44L	chr1	2.68768	7.71403	2.42969	2.87015	0.0151116	yes
P4HA2	chr5	5.84792	16.2642	5.88699	2.78119	3.93283e-09	yes
TPR	chr1	6.8165	18.6751	4.27591	2.73969	1.90355e-05	yes
MMP17	chr12	11.1964	29.4624	11.611	2.63141	0	yes
MRPS5	chr2	5.09841	13.3472	3.20932	2.61792	0.00133051	yes
EIF6	chr20	3.26834	7.83494	2.10437	2.39722	0.0353464	yes
BST2	chr19	13.8224	32.8197	6.14852	2.37439	7.82075e-10	yes
KIAA1522	chr1	8.43986	18.8289	10.0027	2.23094	0	yes
RASAL1	chr12	8.65024	19.2554	6.02693	2.22599	1.67102e-09	yes
CUL9	chr6	8.99015	19.3963	5.76499	2.1575	8.16649e-09	yes
MED13L	chr17	5.45619	11.6264	2.45143	2.13087	0.0142289	yes
LASS4	chr19	2.66991	5.63842	2.49844	2.11184	0.0124742	yes
ZMAT5	chr22	5.61533	11.834	2.24509	2.10745	0.0247626	yes
NOL8	chr9	4.39909	9.25413	2.52223	2.10365	0.0116614	yes
PTCH1	chr9	7.0517	0.279992	-4.46656	-25.1854	7.94873e-06	yes
ODZ1	chrX	6.27085	0.241974	-5.52209	-25.9154	3.34997e-08	yes
REV3L	chr6	6.05172	0.233518	-5.52209	-25.9154	3.34997e-08	yes
TBC1D16	chr17	9.30102	0.353915	-4.52941	-26.2804	5.91473e-06	yes
UBE4A	chr11	6.02934	0.224741	-4.55985	-26.8279	5.11908e-06	yes
WDFY3	chr4	7.07629	0.258491	-4.58965	-27.3754	4.43984e-06	yes
MYO9A	chr15	4.87275	0.177997	-4.58965	-27.3755	4.43984e-06	yes
PPM1H	chr12	9.82115	0.332183	-4.70308	-29.5655	2.56263e-06	yes
PIP5K3	chr2	3.78538	0.125706	-4.7301	-30.113	2.24408e-06	yes
SCN2A2	chr2	15.3231	0.50533	-7.60242	-30.323	2.90878e-14	yes
MGAT5	chr2	11.2553	0.360656	-4.78266	-31.2079	1.72987e-06	yes
ARFGEF2	chr20	7.26151	0.232681	-4.78266	-31.208	1.72987e-06	yes
INPP5A	chr10	25.053	0.788935	-4.80825	-31.7555	1.52261e-06	yes
EBF1	chr5	5.86107	0.178416	-4.85808	-32.8506	1.18528e-06	yes
NBEA	chr13	11.7651	0.352269	-6.90471	-33.3981	5.03042e-12	yes
CNOT1	chr16	8.0755	0.23412	-4.92975	-34.493	8.23356e-07	yes
WDR7	chr18	9.06305	0.26275	-6.97172	-34.4931	3.13105e-12	yes
MON2	chr12	8.01256	0.226308	-6.08462	-35.4056	1.16767e-09	yes
CADPS	chr3	15.2469	0.421937	-4.99801	-36.1355	5.79238e-07	yes
TNC	chr9	5.54575	0.153471	-4.99801	-36.1355	5.79238e-07	yes
ITGB8	chr7	7.38908	0.20143	-5.02007	-36.6831	5.16533e-07	yes
MED13L	chr12	7.77748	0.210969	-6.15721	-36.8655	7.40357e-10	yes
KIAA0802	chr18	14.4233	0.387405	-5.04179	-37.2305	4.61202e-07	yes
ABLIM1	chr10	19.2058	0.39862	-6.63663	-48.1807	3.20928e-11	yes
DAO	chr12	10.0459	0.20387	-5.45156	-49.276	4.99295e-08	yes
TFRC	chr3	9.17108	0.180114	-5.49936	-50.9182	3.81183e-08	yes
GRM1	chr6	7.96543	0.142632	-5.63384	-55.846	1.76237e-08	yes
GRM4	chr6	29.2203	0.392424	-9.56798	-74.461	0	yes
RELN	chr7	32.1276	0.272929	-6.71219	-117.714	1.91722e-11	yes
ANK1	chr8	13.7202	0.086115	-7.14688	-159.324	8.87734e-13	yes
RELN	chr7	19.4443	0.055404	-8.27531	-350.955	2.22045e-16	yes
Differential gene expression for total brain was calculated using the ratio of AD versus normal FPKM values for every gene identified as expressed by Cufflinks. The genes were ranked on this ratio (fold change), and those with the 30 highest and 30 lowest fold change values are shown here.
