# Supplementary material for: Whole Transcriptome Sequencing Reveals Gene Expression and Splicing Differences in Brain Regions Affected by Alzheimer's Disease
Source: PLoS One. 2011 Jan 21;6(1):e16266. doi: 10.1371/journal.pone.0016266 (PMC3025006; doi:10.1371/journal.pone.0016266)
Supplement: Table S2 — Top 30 up and top 30 down regulated genes in AD frontal lobe. Differential gene expression for frontal lobe was calculated using the ratio of AD versus normal FPKM values for every gene identified as expressed by Cufflinks. The genes were ranked on this ratio (fold change), and those with the 30 highest and 30 lowest fold change values are shown here. (XLSX) [file pone.0016266.s002.xlsx]

## Sheet: Sheet1
Table S2. Top 30 up and top 30 down regulated genes in AD frontal lobe.
GENE	CHROMOSOME	FPKM NORM	FPKM AD	TEST STAT	FOLD CHANGE	P VALUE	significant (after FDR)
PCK1	chr20	0.121441	3.18662	4.53091	26.2401	5.8729e-06	yes
CD163	chr12	0.264139	4.43587	3.87038	16.7937	0.000108665	yes
AC012317.1	chr16	0.295506	3.91335	2.48679	13.2429	0.0128902	yes
NUPR1	chr16	7.93458	94.4887	21.3732	11.9085	0	yes
GDPD3	chr16	0.262915	3.10452	4.73174	11.8081	2.22605e-06	yes
STAB1	chr3	0.407594	4.27813	3.17008	10.496	0.00152394	yes
MOV10	chr1	0.584517	5.52161	3.68996	9.44644	0.00022429	yes
MLKL	chr16	0.268134	2.53291	3.01284	9.44643	0.00258816	yes
LY6G5C	chr6	0.275959	2.462	2.92755	8.92163	0.00341639	yes
ITPR3	chr6	0.27173	2.28167	2.83714	8.39682	0.00455198	yes
TEAD4	chr12	0.66907	5.09096	2.69035	7.60901	0.00713781	yes
ZDHHC11B	chr5	2.91033	21.941	4.43814	7.539	9.07394e-06	yes
LY96	chr8	0.54555	4.00828	2.63824	7.34722	0.00833373	yes
RP4-697K14.12	chr20	0.727399	4.19915	2.28066	5.77282	0.0225683	yes
GRK4	chr4	0.738765	3.87705	2.62129	5.24802	0.00875972	yes
SLC26A1	chr4	0.579739	2.83965	2.49738	4.89815	0.0125114	yes
DHX58	chr17	0.521481	2.55429	2.49738	4.89815	0.0125114	yes
MT1X	chr16	24.2327	115.947	11.2406	4.78475	0	yes
C1QB	chr1	25.6289	119.35	25.9242	4.65687	0	yes
FGF17	chr8	3.86844	17.4014	6.20484	4.49831	5.47524e-10	yes
ZCCHC11	chr1	1.01801	4.27403	2.22264	4.19842	0.0262402	yes
MKNK2	chr19	12.7726	50.0967	10.5821	3.9222	0	yes
DIP2C	chr10	1.19535	4.67701	5.68126	3.91267	1.33707e-08	yes
CLDN15	chr7	2.51049	9.22258	2.29506	3.67362	0.0217298	yes
NBPF1	chr1	1.60577	5.89897	2.81086	3.67361	0.00494091	yes
MKNK2	chr19	4.81565	17.0016	3.67317	3.53049	0.000239555	yes
C1R	chr12	6.21992	21.6114	10.1806	3.47455	0	yes
RARRES3	chr11	8.89406	30.0667	9.33662	3.38054	0	yes
DNASE1L2	chr16	2.62672	8.86184	3.9736	3.37373	7.07941e-05	yes
SCRIB	chr8	9.16436	28.6783	7.22058	3.12933	5.17586e-13	yes
STAT1	chr2	14.2362	43.0105	17.2769	3.0212	0	yes
DHTKD1	chr10	5.09381	0.411268	-3.42946	-12.3856	0.000604781	yes
ENTPD3	chr3	6.18778	0.499593	-3.42946	-12.3856	0.000604781	yes
STXBP5	chr6	4.48449	0.348662	-3.48551	-12.862	0.000491207	yes
KIAA0319	chr6	4.43259	0.340424	-4.29117	-13.0208	1.77736e-05	yes
GRM5	chr11	6.05084	0.443092	-4.37775	-13.6559	1.19913e-05	yes
SLC4A4	chr4	5.20524	0.379406	-5.66253	-13.7194	1.49154e-08	yes
PLD4	chr14	5.92715	0.429046	-3.59157	-13.8147	0.000328693	yes
SLCO1C1	chr12	5.04098	0.364899	-6.22078	-13.8147	4.94691e-10	yes
WDR17	chr4	6.67767	0.483373	-3.59157	-13.8147	0.000328693	yes
ATP6V1A	chr3	58.7839	4.24654	-10.4799	-13.8428	0	yes
ANKRD52	chr12	4.97113	0.347848	-3.64186	-14.2911	0.000270677	yes
HTT	chr4	4.63876	0.32459	-4.46035	-14.2911	8.18269e-06	yes
ANKFY1	chr17	4.81086	0.325774	-3.69048	-14.7675	0.000223831	yes
MAN1A1	chr6	7.02417	0.475651	-3.69048	-14.7675	0.000223831	yes
ATP10B	chr5	3.2375	0.212381	-3.73754	-15.2438	0.000185831	yes
RIMS1	chr6	11.8606	0.762178	-4.61495	-15.5615	3.93191e-06	yes
SUSD1	chr9	5.29504	0.33683	-3.78313	-15.7202	0.000154868	yes
ATP8A2	chr13	8.29932	0.527939	-3.78313	-15.7202	0.000154868	yes
DHTKD1	chr10	4.48354	0.285208	-3.78313	-15.7202	0.000154868	yes
TFRC	chr3	7.46541	0.435318	-3.91194	-17.1493	9.15574e-05	yes
GAPVD1	chr9	6.93797	0.404562	-3.91194	-17.1493	9.15574e-05	yes
VWF	chr12	6.0129	0.32365	-4.03029	-18.5784	5.57091e-05	yes
ATP8A1	chr4	7.66187	0.412407	-4.03029	-18.5784	5.57091e-05	yes
EDEM3	chr1	5.64477	0.303834	-4.03029	-18.5785	5.57091e-05	yes
ACOX1	chr17	8.28587	0.442214	-4.95147	-18.7372	7.36541e-07	yes
GPR107	chr9	7.31149	0.383708	-4.06769	-19.0548	4.7482e-05	yes
NAG	chr2	6.54659	0.327206	-4.13972	-20.0075	3.47729e-05	yes
ATRN	chr20	7.2984	0.333062	-4.27387	-21.913	1.92108e-05	yes
LPIN2	chr18	7.50745	0.335313	-4.30555	-22.3894	1.66569e-05	yes
PTPRO	chr12	8.77741	0.368512	-4.39664	-23.8185	1.09939e-05	yes
SLIT1	chr10	9.63131	0.367602	-4.53675	-26.2004	5.71275e-06	yes
Differential gene expression for frontal lobe was calculated using the ratio of AD versus normal FPKM values for every gene identified as expressed by Cufflinks. The genes were ranked on this ratio (fold change), and those with the 30 highest and 30 lowest fold change values are shown here.
