# Supplementary material for: Whole Transcriptome Sequencing Reveals Gene Expression and Splicing Differences in Brain Regions Affected by Alzheimer's Disease
Source: PLoS One. 2011 Jan 21;6(1):e16266. doi: 10.1371/journal.pone.0016266 (PMC3025006; doi:10.1371/journal.pone.0016266)
Supplement: Table S5 — Top 20 Clusters from functional enrichment analysis using the DAVID tool for frontal lobe. The NCBI tool, DAVID, was used to investigate functional associations of gene expression changes seen in AD frontal lobe. There were 944 genes that were more than two-fold over- or under-expressed in AD relative to normal frontal lobe and these were analysed by the functional clustering tool. Gene Ontology Biological Process was selected as the annotation category for clustering. Once the tool has identified enriched ontologies for a particular gene list, it creates annotation clusters with those that have a statistically significant overlap in terms of their constituent genes. The top 20 annotation clusters are shown in this table. (XLSX) [file pone.0016266.s005.xlsx]

## Sheet: DAVID_top30_frontal
Table S5. Top 20 Clusters from functional enrichment analysis using the DAVID tool for frontal lobe.
Annotation Cluster 1	Enrichment Score: 5.665451250028646
Category	Term	Count	%	PValue	Genes	List Total	Pop Hits	Pop Total	Fold Enrichment	Bonferroni	Benjamini	FDR
GOTERM_BP_FAT	GO:0008104~protein localization	88	9.32203	5.33927e-08	ALS2, SEC31A, AP1G2, TLN2, CHMP6, ATP6AP1, PEX6, VPS37A, VPS53, VPS33B, CANX, KLHL2, OS9, STXBP5L, AKT1, AP2B1, AP1S1, TRIM3, DNAJC14, TIMM9, RANBP3, AP3B2, VPS4A, STAM, AGAP2, SCAMP5, DHCR24, SCAMP1, KDELR2, STX1A, ATG9A, RINT1, VPS41, HERC2, RPH3A, NUPL1, PRKCB, BBS2, COPG2, PSEN1, STXBP5, ARCN1, SORT1, RAB15, PDCD6IP, RAB13, COPG, SNX13, SEC23B, EXOC6B, DERL2, ARFGAP3, NAPG, SNX14, SNX17, GPAA…	745	882	13528	1.81172	0.000153385	7.66957e-05	9.56796e-05
GOTERM_BP_FAT	GO:0046907~intracellular transport	70	7.41525	1.38499e-07	ALS2, SPG7, SEC31A, AP1G2, ATP6AP1, PEX6, BNIP3, KLHL2, AKT1, AP2B1, AP1S1, SLC1A3, RAE1, TIMM9, PUM1, RANBP3, AP3B2, VPS4A, STAM, DYNC1I1, SCAMP1, KDELR2, ARL1, STX1A, KIF5B, VPS41, HERC2, RPH3A, ANKRD27, DDX39, NPC1, COPG2, KIF1A, KIF1B, PSEN1, TXNDC5, ARCN1, SORT1, THOC5, COPG, MYBBP1A, LRPPRC, SEC23B, DERL2, ARFGAP3, AGFG1, NAPG, SNX17, NFKBIA, NAPB, RIMS1, EXOC4, PAFAH1B1, TNPO2, SRP54, HTT,…	745	657	13528	1.93468	0.00039783	9.94723e-05	0.000248191
GOTERM_BP_FAT	GO:0045184~establishment of protein localization	78	8.26271	1.81361e-07	SEC31A, AP1G2, CHMP6, ATP6AP1, PEX6, VPS37A, VPS53, VPS33B, CANX, KLHL2, STXBP5L, AKT1, AP2B1, AP1S1, TRIM3, DNAJC14, TIMM9, RANBP3, AP3B2, VPS4A, STAM, AGAP2, SCAMP5, SCAMP1, KDELR2, STX1A, ATG9A, RINT1, VPS41, HERC2, RPH3A, NUPL1, PRKCB, COPG2, PSEN1, STXBP5, ARCN1, SORT1, RAB15, PDCD6IP, RAB13, COPG, SNX13, SEC23B, EXOC6B, DERL2, ARFGAP3, NAPG, SNX14, SNX17, RAB40C, NFKBIA, NAPB, RIMS1, EXOC4,…	745	769	13528	1.84181	0.000520914	0.000104205	0.000324998
GOTERM_BP_FAT	GO:0015031~protein transport	77	8.15678	2.5495e-07	SEC31A, AP1G2, CHMP6, ATP6AP1, PEX6, VPS37A, VPS53, VPS33B, CANX, KLHL2, STXBP5L, AKT1, AP2B1, AP1S1, TRIM3, DNAJC14, TIMM9, RANBP3, AP3B2, VPS4A, STAM, AGAP2, SCAMP5, SCAMP1, KDELR2, STX1A, ATG9A, RINT1, VPS41, HERC2, RPH3A, NUPL1, PRKCB, COPG2, PSEN1, STXBP5, ARCN1, SORT1, RAB15, PDCD6IP, RAB13, COPG, SNX13, SEC23B, EXOC6B, DERL2, ARFGAP3, NAPG, SNX14, SNX17, RAB40C, NFKBIA, NAPB, RIMS1, EXOC4,…	745	762	13528	1.8349	0.000732202	0.000122071	0.000456868
GOTERM_BP_FAT	GO:0034613~cellular protein localization	43	4.55508	7.77296e-05	DERL2, ARFGAP3, AP1G2, NAPG, SNX17, ATP6AP1, PEX6, NFKBIA, NAPB, RIMS1, KLHL2, AKT1, AP1S1, AP2B1, TIMM9, AP3B2, EXOC4, TNKS, STAM, TNPO2, KDELR2, STX1A, SRP54, HTT, STRADA, VPS41, ARFIP1, REEP1, HERC2, RPH3A, BBS2, COPG2, COG7, TOM1L2, TOMM70A, AP2A1, ARCN1, YWHAQ, TRPC4AP, SORT1, SYTL2, COPG, SEC23B	745	411	13528	1.89978	0.200146	0.00855267	0.1392
GOTERM_BP_FAT	GO:0006886~intracellular protein transport	40	4.23729	9.02615e-05	DERL2, ARFGAP3, NAPG, AP1G2, SNX17, ATP6AP1, PEX6, NFKBIA, NAPB, RIMS1, KLHL2, AKT1, AP1S1, AP2B1, TIMM9, AP3B2, EXOC4, STAM, TNPO2, KDELR2, STX1A, SRP54, HTT, STRADA, VPS41, ARFIP1, HERC2, RPH3A, COPG2, COG7, TOM1L2, TOMM70A, AP2A1, ARCN1, YWHAQ, TRPC4AP, SORT1, SYTL2, COPG, SEC23B	745	374	13528	1.94207	0.228434	0.00860718	0.161625
GOTERM_BP_FAT	GO:0070727~cellular macromolecule localization	43	4.55508	9.1585e-05	DERL2, ARFGAP3, AP1G2, NAPG, SNX17, ATP6AP1, PEX6, NFKBIA, NAPB, RIMS1, KLHL2, AKT1, AP1S1, AP2B1, TIMM9, AP3B2, EXOC4, TNKS, STAM, TNPO2, KDELR2, STX1A, SRP54, HTT, STRADA, VPS41, ARFIP1, REEP1, HERC2, RPH3A, BBS2, COPG2, COG7, TOM1L2, TOMM70A, AP2A1, ARCN1, YWHAQ, TRPC4AP, SORT1, SYTL2, COPG, SEC23B	745	414	13528	1.88602	0.231362	0.00845232	0.163993
Annotation Cluster 2	Enrichment Score: 5.0106659228123736
Category	Term	Count	%	PValue	Genes	List Total	Pop Hits	Pop Total	Fold Enrichment	Bonferroni	Benjamini	FDR
GOTERM_BP_FAT	GO:0016192~vesicle-mediated transport	70	7.41525	6.27303e-10	ALS2, SEPT5, SEC31A, AP1G2, SORL1, VPS33B, STXBP5L, AP2B1, AP1S1, PICALM, PUM1, AP3B2, VPS4A, CAP1, SCAMP5, SCAMP1, KDELR2, ARL1, STX1A, RINT1, VPS41, ERGIC3, ANKRD27, NPC1, COPG2, GAPVD1, LRP10, STXBP6, PSEN1, STXBP5, IGF2R, TXNDC5, ARCN1, SORT1, RAB13, COPG, SEC23B, SH3GL1, KALRN, EXOC6B, ARFGAP3, NAPG, SNX17, NAPB, RIMS1, DNER, EXOC4, ELMOD1, HTT, SPTBN4, TGFBR2, GARS, CADPS, LMBR1L, LRP1, TFR…	745	576	13528	2.20675	1.80224e-06	1.80224e-06	1.12413e-06
GOTERM_BP_FAT	GO:0016044~membrane organization	44	4.66102	5.69981e-06	SEC31A, SAMM50, NAPG, SNX17, SORL1, BNIP3, VPS33B, RIMS1, AP1S1, PICALM, DNER, TIMM9, AP3B2, PUM1, HSPA4, ZMPSTE24, PAFAH1B1, CAP1, DHCR24, ELMOD1, SCAMP1, DNM1L, HTT, TGFBR2, REEP1, LMBR1L, NPC1, LRP1, GAPVD1, LRP10, TFRC, GRIA2, STAB1, AP2A1, GRIA1, IGF2R, TXNDC5, ARCN1, LRP6, SORT1, GRK4, COPG, SH3GL1, LRP5	745	381	13528	2.09703	0.0162422	0.00233664	0.0102136
GOTERM_BP_FAT	GO:0006898~receptor-mediated endocytosis	12	1.27119	0.000117998	AP1S1, LRP1, PICALM, GRIA2, STAB1, GRIA1, IGF2R, SNX17, SORL1, TGFBR2, GRK4, CAP1	745	53	13528	4.11133	0.287537	0.00912105	0.211241
GOTERM_BP_FAT	GO:0010324~membrane invagination	26	2.75424	0.000457857	SNX17, SORL1, AP1S1, PICALM, DNER, AP3B2, CAP1, ELMOD1, SCAMP1, TGFBR2, LMBR1L, NPC1, LRP1, GAPVD1, TFRC, GRIA2, LRP10, STAB1, AP2A1, GRIA1, IGF2R, LRP6, SORT1, GRK4, LRP5, SH3GL1	745	220	13528	2.14599	0.73172	0.0232212	0.817308
GOTERM_BP_FAT	GO:0006897~endocytosis	26	2.75424	0.000457857	SNX17, SORL1, AP1S1, PICALM, DNER, AP3B2, CAP1, ELMOD1, SCAMP1, TGFBR2, LMBR1L, NPC1, LRP1, GAPVD1, TFRC, GRIA2, LRP10, STAB1, AP2A1, GRIA1, IGF2R, LRP6, SORT1, GRK4, LRP5, SH3GL1	745	220	13528	2.14599	0.73172	0.0232212	0.817308
Annotation Cluster 3	Enrichment Score: 3.766995166434962
Category	Term	Count	%	PValue	Genes	List Total	Pop Hits	Pop Total	Fold Enrichment	Bonferroni	Benjamini	FDR
GOTERM_BP_FAT	GO:0032990~cell part morphogenesis	32	3.38983	2.97242e-05	ALS2, NRP2, BBS7, DYNC2LI1, EPHB3, MYCBP2, UNC5A, COL4A3BP, KAL1, PAFAH1B1, UNC5C, DNM1L, NRXN3, CREB1, SPTBN4, KIF5C, MAP1B, DPYSL5, SLIT1, SLIT2, VASP, BBS2, SLC26A6, MAP1S, ULK2, CNTN2, MAPK8IP3, CYFIP1, RELN, BMP7, CACNA1A, KALRN	745	256	13528	2.2698	0.0818539	0.00567708	0.0532523
GOTERM_BP_FAT	GO:0048667~cell morphogenesis involved in neuron differentiation	28	2.9661	3.08649e-05	ALS2, NRP2, EPHB3, MYCBP2, ATP2B2, SLC1A3, UNC5A, KAL1, PAFAH1B1, UNC5C, NRXN3, CREB1, KIF5C, MAP1B, SPTBN4, DPYSL5, SLIT1, VASP, SLIT2, SLC26A6, ULK2, CNTN2, MAPK8IP3, CYFIP1, RELN, BMP7, CACNA1A, KALRN	745	209	13528	2.4327	0.0848582	0.00552694	0.0552954
GOTERM_BP_FAT	GO:0032989~cellular component morphogenesis	43	4.55508	3.49074e-05	ALS2, NRP2, BBS7, AGFG1, DYNC2LI1, C22ORF28, EPHB3, SCRIB, MYCBP2, ATP2B2, SLC1A3, UNC5A, KAL1, COL4A3BP, PAFAH1B1, CAP1, UNC5C, ERCC2, FN1, CAP2, DNM1L, NRXN3, CREB1, SPTBN4, MAP1B, KIF5C, DPYSL5, SLIT1, SLIT2, VASP, BBS2, SLC26A6, MAP1S, ULK2, MYH11, CNTN2, CYFIP1, MAPK8IP3, RELN, BMP7, CACNA1A, KALRN, ADD1	745	397	13528	1.96678	0.0954256	0.00588208	0.0625355
GOTERM_BP_FAT	GO:0048666~neuron development	38	4.02542	5.24721e-05	ALS2, NRP2, EPHB3, MYCBP2, ATP2B2, SLC1A3, PTK2B, UNC5A, ATXN10, KAL1, PAFAH1B1, UNC5C, HTT, NRXN3, CREB1, SPTBN4, MAP1B, KIF5C, DPYSL5, NTN4, SLIT1, SLIT2, GPR98, VASP, SLC26A6, RND1, PSEN1, MAP1S, RASGRF1, ULK2, MAP2, CNTN2, CYFIP1, MAPK8IP3, RELN, BMP7, CACNA1A, KALRN	745	339	13528	2.03545	0.139943	0.00834038	0.0939882
GOTERM_BP_FAT	GO:0000902~cell morphogenesis	39	4.13136	6.75553e-05	ALS2, NRP2, BBS7, DYNC2LI1, C22ORF28, EPHB3, SCRIB, MYCBP2, ATP2B2, SLC1A3, UNC5A, COL4A3BP, KAL1, PAFAH1B1, CAP1, UNC5C, FN1, CAP2, NRXN3, CREB1, SPTBN4, MAP1B, KIF5C, DPYSL5, SLIT1, SLIT2, VASP, BBS2, SLC26A6, MAP1S, ULK2, CNTN2, CYFIP1, MAPK8IP3, RELN, BMP7, CACNA1A, KALRN, ADD1	745	356	13528	1.98926	0.176419	0.00919993	0.12099
GOTERM_BP_FAT	GO:0031175~neuron projection development	31	3.2839	7.34262e-05	ALS2, NRP2, EPHB3, MYCBP2, PTK2B, UNC5A, ATXN10, KAL1, PAFAH1B1, UNC5C, NRXN3, CREB1, SPTBN4, KIF5C, MAP1B, DPYSL5, SLIT1, SLIT2, VASP, SLC26A6, MAP1S, RASGRF1, ULK2, MAP2, CNTN2, MAPK8IP3, CYFIP1, RELN, BMP7, CACNA1A, KALRN	745	256	13528	2.19887	0.190195	0.0091303	0.131498
GOTERM_BP_FAT	GO:0000904~cell morphogenesis involved in differentiation	30	3.17797	7.45589e-05	ALS2, NRP2, C22ORF28, EPHB3, MYCBP2, ATP2B2, SLC1A3, UNC5A, KAL1, PAFAH1B1, UNC5C, FN1, NRXN3, CREB1, KIF5C, MAP1B, SPTBN4, DPYSL5, SLIT1, SLIT2, VASP, SLC26A6, ULK2, CNTN2, MAPK8IP3, CYFIP1, RELN, BMP7, CACNA1A, KALRN	745	244	13528	2.23259	0.192826	0.00888594	0.133525
GOTERM_BP_FAT	GO:0048858~cell projection morphogenesis	30	3.17797	8.04974e-05	ALS2, NRP2, BBS7, DYNC2LI1, EPHB3, MYCBP2, UNC5A, KAL1, PAFAH1B1, UNC5C, NRXN3, CREB1, KIF5C, MAP1B, SPTBN4, DPYSL5, SLIT1, SLIT2, VASP, BBS2, SLC26A6, MAP1S, ULK2, CNTN2, MAPK8IP3, CYFIP1, RELN, BMP7, CACNA1A, KALRN	745	245	13528	2.22348	0.206481	0.00852928	0.144153
GOTERM_BP_FAT	GO:0048812~neuron projection morphogenesis	27	2.86017	0.00011232	ALS2, NRP2, EPHB3, MYCBP2, UNC5A, KAL1, PAFAH1B1, UNC5C, NRXN3, CREB1, KIF5C, MAP1B, SPTBN4, DPYSL5, SLIT1, VASP, SLIT2, SLC26A6, MAP1S, ULK2, CNTN2, MAPK8IP3, CYFIP1, RELN, BMP7, CACNA1A, KALRN	745	213	13528	2.30177	0.275818	0.00917798	0.201085
GOTERM_BP_FAT	GO:0007409~axonogenesis	25	2.64831	0.000152869	ALS2, NRP2, EPHB3, MYCBP2, UNC5A, KAL1, PAFAH1B1, UNC5C, NRXN3, CREB1, KIF5C, MAP1B, SPTBN4, DPYSL5, SLIT1, VASP, SLIT2, SLC26A6, ULK2, CNTN2, MAPK8IP3, CYFIP1, RELN, BMP7, KALRN	745	193	13528	2.35212	0.355464	0.00993273	0.273586
GOTERM_BP_FAT	GO:0030030~cell projection organization	38	4.02542	0.000281868	ALS2, NRP2, BBS7, DYNC2LI1, EPHB3, MYCBP2, AKT1, ATP2B2, PTK2B, UNC5A, ATXN10, KAL1, PAFAH1B1, UNC5C, NRXN3, CREB1, SPTBN4, MAP1B, KIF5C, DPYSL5, SLIT1, SLIT2, GPR98, VASP, CDH13, BBS2, SLC26A6, MAP1S, RASGRF1, ULK2, MAP2, CNTN2, CYFIP1, MAPK8IP3, RELN, BMP7, CACNA1A, KALRN	745	368	13528	1.87505	0.555106	0.0174529	0.503904
GOTERM_BP_FAT	GO:0030182~neuron differentiation	41	4.34322	0.00111741	ALS2, NRP2, EPHB3, MYCBP2, ATP2B2, SLC1A3, ATXN10, PTK2B, UNC5A, KAL1, MTPN, PAFAH1B1, UNC5C, TUBB3, HTT, NRXN3, CREB1, SPTBN4, MAP1B, KIF5C, SMAD4, DPYSL5, NTN4, SLIT1, SLIT2, GPR98, VASP, SLC26A6, RND1, PSEN1, MAP1S, RASGRF1, ULK2, MAP2, CNTN2, CYFIP1, MAPK8IP3, RELN, BMP7, CACNA1A, KALRN	745	438	13528	1.69976	0.959728	0.0430475	1.98358
GOTERM_BP_FAT	GO:0007411~axon guidance	15	1.58898	0.00214589	NRP2, NRXN3, KIF5C, DPYSL5, EPHB3, SLIT1, SLIT2, VASP, MYCBP2, UNC5A, KAL1, MAPK8IP3, RELN, UNC5C, BMP7	745	107	13528	2.54557	0.997912	0.0733642	3.77641
GOTERM_BP_FAT	GO:0006928~cell motion	37	3.91949	0.0314932	NRP2, PPARD, FUT8, CAPZA2, EPHB3, SCRIB, MYCBP2, ACTR3, PTK2B, UNC5A, KAL1, DNER, SEMA3F, PAFAH1B1, CAP1, UNC5C, FN1, NRXN3, ARHGEF7, KIF5C, DPYSL5, NRD1, SLIT1, SLIT2, VASP, CDH13, TNS3, PSEN1, CD34, LRP6, CNTN2, MAPK8IP3, RELN, AMFR, BMP7, ENG, LRP5	745	475	13528	1.41444	1	0.403389	43.6414
Annotation Cluster 4	Enrichment Score: 3.731082877205695
Category	Term	Count	%	PValue	Genes	List Total	Pop Hits	Pop Total	Fold Enrichment	Bonferroni	Benjamini	FDR
GOTERM_BP_FAT	GO:0006796~phosphate metabolic process	83	8.79237	5.92114e-05	PRPF4B, NUAK1, ATP6AP1, DSTYK, CASK, DMPK, AKT1, SLK, MAP3K9, COL4A3BP, STK39, MLKL, MATK, MAP2K5, ADAM9, PPP2R1A, TYRO3, BCR, LIMK1, MADD, PIK3C2B, PTPRN2, PTPRS, MINK1, WNK2, NDUFA10, PRKCD, PTPRO, GAK, PRKCB, MTMR12, TYK2, MAP4K4, ATP6V1A, EIF2AK1, SBF1, PSEN1, HIPK2, RELN, CSNK1G3, LRRK1, EIF2AK4, KALRN, NRBP2, MKNK2, PPM1A, ATP6V1B2, EPHB3, MTM1, PTK2B, PRKRA, TNKS, AGK, MTMR7, CAMK2A, MTMR4…	745	973	13528	1.54897	0.156436	0.00891368	0.106054
GOTERM_BP_FAT	GO:0006793~phosphorus metabolic process	83	8.79237	5.92114e-05	PRPF4B, NUAK1, ATP6AP1, DSTYK, CASK, DMPK, AKT1, SLK, MAP3K9, COL4A3BP, STK39, MLKL, MATK, MAP2K5, ADAM9, PPP2R1A, TYRO3, BCR, LIMK1, MADD, PIK3C2B, PTPRN2, PTPRS, MINK1, WNK2, NDUFA10, PRKCD, PTPRO, GAK, PRKCB, MTMR12, TYK2, MAP4K4, ATP6V1A, EIF2AK1, SBF1, PSEN1, HIPK2, RELN, CSNK1G3, LRRK1, EIF2AK4, KALRN, NRBP2, MKNK2, PPM1A, ATP6V1B2, EPHB3, MTM1, PTK2B, PRKRA, TNKS, AGK, MTMR7, CAMK2A, MTMR4…	745	973	13528	1.54897	0.156436	0.00891368	0.106054
GOTERM_BP_FAT	GO:0016310~phosphorylation	68	7.20339	0.000344496	PRPF4B, NUAK1, ATP6AP1, CASK, DSTYK, DMPK, AKT1, SLK, MAP3K9, COL4A3BP, STK39, MLKL, MATK, MAP2K5, ADAM9, TYRO3, BCR, LIMK1, MADD, PIK3C2B, MINK1, WNK2, NDUFA10, PRKCD, GAK, PRKCB, TYK2, MAP4K4, ATP6V1A, EIF2AK1, PSEN1, HIPK2, RELN, CSNK1G3, LRRK1, EIF2AK4, KALRN, NRBP2, MKNK2, ATP6V1B2, EPHB3, PTK2B, PRKRA, TNKS, AGK, CAMK2A, PIK3R1, CSF1R, NDUFA9, TAOK1, CREB1, TGFBR2, STRADA, RAF1, TRIO, MAPK1…	745	800	13528	1.54346	0.628389	0.0208416	0.61554
GOTERM_BP_FAT	GO:0006468~protein amino acid phosphorylation	57	6.03814	0.00098554	PRPF4B, NUAK1, CASK, DSTYK, DMPK, AKT1, SLK, MAP3K9, COL4A3BP, STK39, MLKL, MATK, MAP2K5, ADAM9, TYRO3, BCR, LIMK1, MADD, MINK1, WNK2, PRKCD, GAK, PRKCB, TYK2, MAP4K4, EIF2AK1, PSEN1, HIPK2, RELN, CSNK1G3, LRRK1, EIF2AK4, KALRN, NRBP2, MKNK2, EPHB3, PTK2B, PRKRA, TNKS, CAMK2A, CSF1R, TAOK1, CREB1, TGFBR2, STRADA, TRIO, RAF1, MAPK10, STAT1, RPS6KA3, PLK2, ULK2, MAP2, MAPK8IP3, GRK4, BMP7, MYLK	745	667	13528	1.55177	0.941155	0.0391138	1.75144
Annotation Cluster 5	Enrichment Score: 3.6585225932182026
Category	Term	Count	%	PValue	Genes	List Total	Pop Hits	Pop Total	Fold Enrichment	Bonferroni	Benjamini	FDR
GOTERM_BP_FAT	GO:0051056~regulation of small GTPase mediated signal transduction	37	3.91949	1.28402e-07	ALS2, ARFGAP3, AGFG1, PREX1, SCRIB, RASAL2, SMAP1, TBC1D12, PTK2B, RASGRP1, GIT2, RAPGEF5, TBC1D7, PAFAH1B1, IQSEC3, RASA3, AGAP2, TBC1D2, IQSEC2, NGEF, BCR, ABR, KIAA1244, ARHGEF7, NF1, TRIO, ARHGEF12, TBC1D22B, RALGDS, FARP1, NOTCH2, GAPVD1, ACAP3, RASGRF1, RELN, SYNGAP1, KALRN	745	252	13528	2.66611	0.00036883	0.000122958	0.000230095
GOTERM_BP_FAT	GO:0046578~regulation of Ras protein signal transduction	29	3.07203	1.22245e-05	ALS2, ARFGAP3, AGFG1, PREX1, SCRIB, SMAP1, TBC1D12, PTK2B, GIT2, PAFAH1B1, TBC1D7, IQSEC3, AGAP2, TBC1D2, IQSEC2, NGEF, ABR, BCR, KIAA1244, ARHGEF7, NF1, TRIO, ARHGEF12, TBC1D22B, FARP1, NOTCH2, ACAP3, RASGRF1, KALRN	745	210	13528	2.50759	0.0345115	0.00389474	0.0219039
GOTERM_BP_FAT	GO:0043087~regulation of GTPase activity	18	1.90678	0.000398565	ALS2, GDI1, ARFGAP3, AGFG1, NF1, TBC1D22B, SCRIB, SMAP1, ACAP3, TBC1D12, PTK2B, RASGRF1, ARHGAP1, GIT2, PAFAH1B1, TBC1D7, AGAP2, TBC1D2	745	123	13528	2.65733	0.681874	0.0226458	0.711825
GOTERM_BP_FAT	GO:0032318~regulation of Ras GTPase activity	16	1.69492	0.000544209	ALS2, ARFGAP3, AGFG1, NF1, TBC1D22B, SCRIB, SMAP1, ACAP3, TBC1D12, PTK2B, RASGRF1, GIT2, PAFAH1B1, TBC1D7, AGAP2, TBC1D2	745	104	13528	2.7936	0.79069	0.0257288	0.970744
GOTERM_BP_FAT	GO:0032312~regulation of ARF GTPase activity	6	0.635593	0.0169975	ARFGAP3, SMAP1, AGFG1, ACAP3, GIT2, AGAP2	745	28	13528	3.89108	1	0.291377	26.4506
GOTERM_BP_FAT	GO:0051336~regulation of hydrolase activity	29	3.07203	0.0193381	ALS2, ARFGAP3, AGFG1, POT1, SCRIB, SMAP1, TBC1D12, PTK2B, AGT, ARHGAP1, GIT2, PAFAH1B1, TBC1D7, AGAP2, TBC1D2, DHCR24, MSH6, GDI1, MSH3, NF1, SMAD3, NRD1, STAT1, TBC1D22B, GRM5, ACAP3, RASGRF1, GNB1, SORT1	745	337	13528	1.56259	1	0.310329	29.5265
Annotation Cluster 6	Enrichment Score: 3.588627343872405
Category	Term	Count	%	PValue	Genes	List Total	Pop Hits	Pop Total	Fold Enrichment	Bonferroni	Benjamini	FDR
GOTERM_BP_FAT	GO:0006511~ubiquitin-dependent protein catabolic process	31	3.2839	2.54161e-05	USP7, RAD23B, DERL2, KIAA0368, EDEM3, OS9, LNX1, CYLD, FBXW4, PSMD1, USP38, PSMD2, ITCH, USP16, FBXO22, USP32, PSMD8, UBE2A, ANAPC5, DDB1, UBE2H, PSMB8, PSMD14, PSMD13, FBXO31, FBXL7, FAF1, USP22, AMFR, USP25, UBE2E1	745	242	13528	2.32607	0.0704192	0.00520224	0.0455359
GOTERM_BP_FAT	GO:0030163~protein catabolic process	58	6.14407	9.69309e-05	SPG7, HECW2, KIAA0368, SAE1, SENP5, LNX1, SENP6, OS9, AKT1, MGRN1, PSMD1, PSMD2, ITCH, USP16, FBXO22, PSMD8, ADAM9, UBE2A, ANAPC5, DDB1, HERC6, UBE2H, HERC2, PSEN1, PIAS3, FBXL7, AMFR, USP22, USP25, CUEDC2, USP7, RAD23B, DERL2, RAB40C, EDEM3, ZBTB16, C12ORF51, MYCBP2, CYLD, RNF123, FBXW4, USP38, STAMBPL1, ZMPSTE24, NEDD4L, FBXW11, USP32, TRIP12, HECTD1, MARCH6, PSMB8, PSMD14, PSMD13, UBA1, WSB2, …	745	622	13528	1.69323	0.243079	0.00840376	0.173558
GOTERM_BP_FAT	GO:0051603~proteolysis involved in cellular protein catabolic process	56	5.9322	0.000126401	HECW2, KIAA0368, SAE1, SENP5, LNX1, SENP6, OS9, MGRN1, PSMD1, PSMD2, ITCH, USP16, FBXO22, PSMD8, ADAM9, UBE2A, ANAPC5, DDB1, HERC6, UBE2H, HERC2, PSEN1, PIAS3, FBXL7, USP22, AMFR, USP25, CUEDC2, USP7, RAD23B, DERL2, RAB40C, EDEM3, ZBTB16, C12ORF51, MYCBP2, CYLD, RNF123, FBXW4, USP38, STAMBPL1, ZMPSTE24, NEDD4L, FBXW11, USP32, TRIP12, HECTD1, MARCH6, PSMB8, PSMD14, PSMD13, UBA1, WSB2, FBXO31, FAF1…	745	600	13528	1.69478	0.304533	0.00926888	0.226268
GOTERM_BP_FAT	GO:0019941~modification-dependent protein catabolic process	54	5.72034	0.000140912	HECW2, KIAA0368, SAE1, SENP5, LNX1, SENP6, OS9, MGRN1, PSMD1, PSMD2, ITCH, USP16, FBXO22, PSMD8, UBE2A, ANAPC5, DDB1, HERC6, UBE2H, HERC2, PIAS3, FBXL7, USP22, AMFR, USP25, CUEDC2, USP7, RAD23B, DERL2, RAB40C, EDEM3, ZBTB16, C12ORF51, MYCBP2, CYLD, RNF123, FBXW4, USP38, STAMBPL1, ZMPSTE24, NEDD4L, FBXW11, USP32, TRIP12, HECTD1, MARCH6, PSMB8, PSMD14, PSMD13, UBA1, WSB2, FBXO31, FAF1, UBE2E1	745	574	13528	1.70828	0.332935	0.00982622	0.252213
GOTERM_BP_FAT	GO:0043632~modification-dependent macromolecule catabolic process	54	5.72034	0.000140912	HECW2, KIAA0368, SAE1, SENP5, LNX1, SENP6, OS9, MGRN1, PSMD1, PSMD2, ITCH, USP16, FBXO22, PSMD8, UBE2A, ANAPC5, DDB1, HERC6, UBE2H, HERC2, PIAS3, FBXL7, USP22, AMFR, USP25, CUEDC2, USP7, RAD23B, DERL2, RAB40C, EDEM3, ZBTB16, C12ORF51, MYCBP2, CYLD, RNF123, FBXW4, USP38, STAMBPL1, ZMPSTE24, NEDD4L, FBXW11, USP32, TRIP12, HECTD1, MARCH6, PSMB8, PSMD14, PSMD13, UBA1, WSB2, FBXO31, FAF1, UBE2E1	745	574	13528	1.70828	0.332935	0.00982622	0.252213
GOTERM_BP_FAT	GO:0044257~cellular protein catabolic process	56	5.9322	0.000144571	HECW2, KIAA0368, SAE1, SENP5, LNX1, SENP6, OS9, MGRN1, PSMD1, PSMD2, ITCH, USP16, FBXO22, PSMD8, ADAM9, UBE2A, ANAPC5, DDB1, HERC6, UBE2H, HERC2, PSEN1, PIAS3, FBXL7, USP22, AMFR, USP25, CUEDC2, USP7, RAD23B, DERL2, RAB40C, EDEM3, ZBTB16, C12ORF51, MYCBP2, CYLD, RNF123, FBXW4, USP38, STAMBPL1, ZMPSTE24, NEDD4L, FBXW11, USP32, TRIP12, HECTD1, MARCH6, PSMB8, PSMD14, PSMD13, UBA1, WSB2, FBXO31, FAF1…	745	603	13528	1.68635	0.339912	0.00984131	0.258754
GOTERM_BP_FAT	GO:0044265~cellular macromolecule catabolic process	62	6.5678	0.000570709	HECW2, KIAA0368, BNIP3, SAE1, DNASE1L2, SENP5, LNX1, SENP6, OS9, MGRN1, PSMD1, PSMD2, ITCH, USP16, FBXO22, PSMD8, ADAM9, UBE2A, ZCCHC11, ANAPC5, AIFM1, DDB1, HERC6, UBE2H, HERC2, PSEN1, PIAS3, FBXL7, AMFR, USP22, USP25, USP7, CUEDC2, RAD23B, DERL2, RAB40C, EDEM3, ZBTB16, C12ORF51, MYCBP2, CYLD, RNF123, RNASET2, FBXW4, USP38, STAMBPL1, ZMPSTE24, NEDD4L, FBXW11, USP32, TRIP12, HECTD1, ERCC2, MARCH6…	745	725	13528	1.55286	0.806042	0.0265289	1.01779
GOTERM_BP_FAT	GO:0009057~macromolecule catabolic process	65	6.88559	0.000825065	SPG7, HECW2, KIAA0368, BNIP3, SAE1, DNASE1L2, SENP5, LNX1, SENP6, OS9, AKT1, MGRN1, PSMD1, PSMD2, ITCH, USP16, FBXO22, PSMD8, DHCR24, ADAM9, UBE2A, ZCCHC11, ANAPC5, AIFM1, DDB1, HERC6, UBE2H, HERC2, PSEN1, PIAS3, FBXL7, AMFR, USP22, USP25, USP7, CUEDC2, RAD23B, DERL2, RAB40C, EDEM3, ZBTB16, C12ORF51, MYCBP2, CYLD, RNF123, RNASET2, FBXW4, USP38, STAMBPL1, ZMPSTE24, NEDD4L, FBXW11, USP32, TRIP12, H…	745	781	13528	1.51126	0.906649	0.0352923	1.46824
GOTERM_BP_FAT	GO:0006508~proteolysis	76	8.05085	0.0119717	SPG7, HECW2, KIAA0368, SAE1, MMP28, SENP5, OS9, SENP6, LNX1, MGRN1, PSMD1, PSMD2, ITCH, DPP6, USP16, CASP2, FBXO22, PSMD8, ADAM9, DHCR24, UBE2A, ANAPC5, DDB1, HERC6, NRD1, UBE2H, NPEPPS, HERC2, C1QB, FOLH1, PSEN1, CPE, PIAS3, PRCP, FBXL7, AMFR, USP22, CTSB, USP25, PMPCA, USP7, CUEDC2, RAD23B, DERL2, C3, ADAMTS13, RAB40C, C1R, C12ORF51, ZBTB16, EDEM3, MYCBP2, CYLD, RNF123, DNER, FBXW4, STAMBPL1, U…	745	1054	13528	1.30933	1	0.246951	19.4125
Annotation Cluster 7	Enrichment Score: 3.152534265205837
Category	Term	Count	%	PValue	Genes	List Total	Pop Hits	Pop Total	Fold Enrichment	Bonferroni	Benjamini	FDR
GOTERM_BP_FAT	GO:0046034~ATP metabolic process	19	2.01271	1.51238e-05	ATP1B1, ATP10B, ATP1B2, ATP6AP1, ATP1A3, OLA1, ATP1A1, AK5, ATP6V1B2, ATP13A4, ATP2B2, ATP6V1A, ATP2A2, ATP9A, ATP6V1E1, ATP8A2, ATP6V0A1, ATP5A1, ATP8A1	745	105	13528	3.2858	0.0425207	0.00394231	0.0270984
GOTERM_BP_FAT	GO:0006164~purine nucleotide biosynthetic process	23	2.43644	1.89776e-05	ATP1B1, ADCY2, ATP10B, ATP1B2, ADCY8, ATP6AP1, ATP1A3, ATP1A1, AK5, ATP6V1B2, ATP13A4, ATP2B2, ATP6V1A, ATP2A2, ADCY9, ATP9A, ATP6V1E1, ATP8A2, ATP6V0A1, GUCY1B3, ATP5A1, PRPS1, ATP8A1	745	148	13528	2.82191	0.0530633	0.00453328	0.0340023
GOTERM_BP_FAT	GO:0006754~ATP biosynthetic process	17	1.80085	2.42345e-05	ATP1B1, ATP10B, ATP1B2, ATP6AP1, ATP1A3, ATP1A1, ATP6V1B2, ATP13A4, ATP2B2, ATP6V1A, ATP2A2, ATP6V1E1, ATP9A, ATP8A2, ATP6V0A1, ATP5A1, ATP8A1	745	89	13528	3.46846	0.0672579	0.00534157	0.0434193
GOTERM_BP_FAT	GO:0009152~purine ribonucleotide biosynthetic process	19	2.01271	6.74747e-05	ATP1B1, ATP10B, ATP1B2, ATP6AP1, ATP1A3, ATP1A1, AK5, ATP6V1B2, ATP13A4, ATP2B2, ATP6V1A, ATP2A2, ATP9A, ATP6V1E1, ATP8A2, ATP6V0A1, ATP5A1, PRPS1, ATP8A1	745	117	13528	2.9488	0.176228	0.00964624	0.120846
GOTERM_BP_FAT	GO:0009205~purine ribonucleoside triphosphate metabolic process	19	2.01271	6.74747e-05	ATP1B1, ATP10B, ATP1B2, ATP6AP1, ATP1A3, OLA1, ATP1A1, AK5, ATP6V1B2, ATP13A4, ATP2B2, ATP6V1A, ATP2A2, ATP9A, ATP6V1E1, ATP8A2, ATP6V0A1, ATP5A1, ATP8A1	745	117	13528	2.9488	0.176228	0.00964624	0.120846
GOTERM_BP_FAT	GO:0009199~ribonucleoside triphosphate metabolic process	19	2.01271	7.56175e-05	ATP1B1, ATP10B, ATP1B2, ATP6AP1, ATP1A3, OLA1, ATP1A1, AK5, ATP6V1B2, ATP13A4, ATP2B2, ATP6V1A, ATP2A2, ATP9A, ATP6V1E1, ATP8A2, ATP6V0A1, ATP5A1, ATP8A1	745	118	13528	2.92381	0.195277	0.00865264	0.13542
GOTERM_BP_FAT	GO:0009206~purine ribonucleoside triphosphate biosynthetic process	17	1.80085	8.1965e-05	ATP1B1, ATP10B, ATP1B2, ATP6AP1, ATP1A3, ATP1A1, ATP6V1B2, ATP13A4, ATP2B2, ATP6V1A, ATP2A2, ATP6V1E1, ATP9A, ATP8A2, ATP6V0A1, ATP5A1, ATP8A1	745	98	13528	3.14992	0.20982	0.00837527	0.146779
GOTERM_BP_FAT	GO:0006163~purine nucleotide metabolic process	25	2.64831	8.54947e-05	ATP1B1, ADCY2, ATP10B, ATP1B2, ADCY8, ATP6AP1, ATP6V1B2, ATP2B2, PDE8B, ATP1A3, OLA1, AK5, ATP1A1, ATP13A4, ATP6V1A, ATP2A2, ADCY9, ATP6V1E1, ATP9A, ATP8A2, ATP6V0A1, GUCY1B3, ATP5A1, PRPS1, ATP8A1	745	186	13528	2.44064	0.217794	0.00843446	0.153096
GOTERM_BP_FAT	GO:0009145~purine nucleoside triphosphate biosynthetic process	17	1.80085	9.2876e-05	ATP1B1, ATP10B, ATP1B2, ATP6AP1, ATP1A3, ATP1A1, ATP6V1B2, ATP13A4, ATP2B2, ATP6V1A, ATP2A2, ATP6V1E1, ATP9A, ATP8A2, ATP6V0A1, ATP5A1, ATP8A1	745	99	13528	3.11811	0.234208	0.00830424	0.166303
GOTERM_BP_FAT	GO:0009201~ribonucleoside triphosphate biosynthetic process	17	1.80085	9.2876e-05	ATP1B1, ATP10B, ATP1B2, ATP6AP1, ATP1A3, ATP1A1, ATP6V1B2, ATP13A4, ATP2B2, ATP6V1A, ATP2A2, ATP6V1E1, ATP9A, ATP8A2, ATP6V0A1, ATP5A1, ATP8A1	745	99	13528	3.11811	0.234208	0.00830424	0.166303
GOTERM_BP_FAT	GO:0009141~nucleoside triphosphate metabolic process	20	2.11864	9.70359e-05	ATP1B1, ATP10B, ATP1B2, ATP6AP1, ATP1A3, OLA1, ATP1A1, AK5, ATP6V1B2, ATP13A4, ATP2B2, ATP6V1A, ATP2A2, ATP9A, ATP6V1E1, ATP8A2, ATP6V0A1, ENTPD3, ATP5A1, ATP8A1	745	131	13528	2.77227	0.243307	0.00816641	0.173746
GOTERM_BP_FAT	GO:0009144~purine nucleoside triphosphate metabolic process	19	2.01271	0.000117529	ATP1B1, ATP10B, ATP1B2, ATP6AP1, ATP1A3, OLA1, ATP1A1, AK5, ATP6V1B2, ATP13A4, ATP2B2, ATP6V1A, ATP2A2, ATP9A, ATP6V1E1, ATP8A2, ATP6V0A1, ATP5A1, ATP8A1	745	122	13528	2.82795	0.286577	0.00933616	0.210402
GOTERM_BP_FAT	GO:0009142~nucleoside triphosphate biosynthetic process	17	1.80085	0.000133603	ATP1B1, ATP10B, ATP1B2, ATP6AP1, ATP1A3, ATP1A1, ATP6V1B2, ATP13A4, ATP2B2, ATP6V1A, ATP2A2, ATP6V1E1, ATP9A, ATP8A2, ATP6V0A1, ATP5A1, ATP8A1	745	102	13528	3.0264	0.318777	0.00955075	0.239145
GOTERM_BP_FAT	GO:0009260~ribonucleotide biosynthetic process	19	2.01271	0.000145286	ATP1B1, ATP10B, ATP1B2, ATP6AP1, ATP1A3, ATP1A1, AK5, ATP6V1B2, ATP13A4, ATP2B2, ATP6V1A, ATP2A2, ATP9A, ATP6V1E1, ATP8A2, ATP6V0A1, ATP5A1, PRPS1, ATP8A1	745	124	13528	2.78233	0.341267	0.00966087	0.260033
GOTERM_BP_FAT	GO:0009150~purine ribonucleotide metabolic process	20	2.11864	0.000195541	ATP1B1, ATP10B, ATP1B2, ATP6AP1, ATP1A3, OLA1, ATP1A1, AK5, ATP6V1B2, ATP13A4, ATP2B2, ATP6V1A, ATP2A2, ATP9A, ATP6V1E1, ATP8A2, ATP6V0A1, ATP5A1, PRPS1, ATP8A1	745	138	13528	2.63165	0.429843	0.0124078	0.34983
GOTERM_BP_FAT	GO:0009259~ribonucleotide metabolic process	20	2.11864	0.000443816	ATP1B1, ATP10B, ATP1B2, ATP6AP1, ATP1A3, OLA1, ATP1A1, AK5, ATP6V1B2, ATP13A4, ATP2B2, ATP6V1A, ATP2A2, ATP9A, ATP6V1E1, ATP8A2, ATP6V0A1, ATP5A1, PRPS1, ATP8A1	745	147	13528	2.47053	0.720671	0.0233412	0.792339
GOTERM_BP_FAT	GO:0009165~nucleotide biosynthetic process	23	2.43644	0.000571751	ATP1B1, ADCY2, ATP10B, ATP1B2, ADCY8, ATP6AP1, ATP1A3, ATP1A1, AK5, ATP6V1B2, ATP13A4, ATP2B2, ATP6V1A, ATP2A2, ADCY9, ATP9A, ATP6V1E1, ATP8A2, ATP6V0A1, GUCY1B3, ATP5A1, PRPS1, ATP8A1	745	186	13528	2.24539	0.806622	0.0261537	1.01964
GOTERM_BP_FAT	GO:0034404~nucleobase, nucleoside and nucleotide biosynthetic process	23	2.43644	0.000942205	ATP1B1, ADCY2, ATP10B, ATP1B2, ADCY8, ATP6AP1, ATP1A3, ATP1A1, AK5, ATP6V1B2, ATP13A4, ATP2B2, ATP6V1A, ATP2A2, ADCY9, ATP9A, ATP6V1E1, ATP8A2, ATP6V0A1, GUCY1B3, ATP5A1, PRPS1, ATP8A1	745	193	13528	2.16395	0.933345	0.0379501	1.67504
GOTERM_BP_FAT	GO:0034654~nucleobase, nucleoside, nucleotide and nucleic acid biosynthetic process	23	2.43644	0.000942205	ATP1B1, ADCY2, ATP10B, ATP1B2, ADCY8, ATP6AP1, ATP1A3, ATP1A1, AK5, ATP6V1B2, ATP13A4, ATP2B2, ATP6V1A, ATP2A2, ADCY9, ATP9A, ATP6V1E1, ATP8A2, ATP6V0A1, GUCY1B3, ATP5A1, PRPS1, ATP8A1	745	193	13528	2.16395	0.933345	0.0379501	1.67504
GOTERM_BP_FAT	GO:0044271~nitrogen compound biosynthetic process	30	3.17797	0.00698469	ATP1B1, ALDH18A1, ADCY2, ATP10B, ATP1B2, ADCY8, ATP6AP1, ATP6V1B2, AKT1, ATP2B2, SLC1A3, HTT, ATP1A3, PADI2, AK5, ATP1A1, ATP13A4, MTRR, ATP6V1A, ATP2A2, ADCY9, ATP9A, ATP6V1E1, ATP8A2, ATP6V0A1, GUCY1B3, ATP5A1, PSAT1, ATP8A1, PRPS1	745	325	13528	1.67616	1	0.177584	11.8037
GOTERM_BP_FAT	GO:0015985~energy coupled proton transport, down electrochemical gradient	6	0.635593	0.0666585	ATP6V1A, ATP6AP1, ATP6V1E1, ATP6V0A1, ATP6V1B2, ATP5A1	745	40	13528	2.72376	1	0.560611	70.9512
GOTERM_BP_FAT	GO:0015986~ATP synthesis coupled proton transport	6	0.635593	0.0666585	ATP6V1A, ATP6AP1, ATP6V1E1, ATP6V0A1, ATP6V1B2, ATP5A1	745	40	13528	2.72376	1	0.560611	70.9512
GOTERM_BP_FAT	GO:0034220~ion transmembrane transport	6	0.635593	0.130384	ATP6V1A, ATP6AP1, ATP6V1E1, ATP6V0A1, ATP6V1B2, ATP5A1	745	49	13528	2.22348	1	0.724886	91.82
GOTERM_BP_FAT	GO:0015992~proton transport	6	0.635593	0.243693	ATP6V1A, ATP6AP1, ATP6V1E1, ATP6V0A1, ATP6V1B2, ATP5A1	745	61	13528	1.78607	1	0.856724	99.3297
GOTERM_BP_FAT	GO:0006818~hydrogen transport	6	0.635593	0.264723	ATP6V1A, ATP6AP1, ATP6V1E1, ATP6V0A1, ATP6V1B2, ATP5A1	745	63	13528	1.72937	1	0.873078	99.5956
GOTERM_BP_FAT	GO:0006119~oxidative phosphorylation	8	0.847458	0.293578	ATP6V1A, NDUFA9, ATP6AP1, ATP6V1E1, ATP6V0A1, ATP6V1B2, ATP5A1, NDUFA10	745	98	13528	1.48232	1	0.895014	99.8027
Annotation Cluster 8	Enrichment Score: 3.1497870876352176
Category	Term	Count	%	PValue	Genes	List Total	Pop Hits	Pop Total	Fold Enrichment	Bonferroni	Benjamini	FDR
GOTERM_BP_FAT	GO:0070647~protein modification by small protein conjugation or removal	21	2.22458	0.000493253	USP7, UBE2A, DDB1, SAE1, UBE2H, HERC2, TSPAN17, OS9, LNX1, AKT1, PSMD14, PIAS3, NEDD4L, AMFR, USP22, ITCH, USP16, FBXW11, TRIP12, HECTD1, UBE2E1	745	160	13528	2.38329	0.757673	0.0241428	0.88023
GOTERM_BP_FAT	GO:0016567~protein ubiquitination	17	1.80085	0.00079434	UBE2A, DDB1, SAE1, UBE2H, HERC2, TSPAN17, OS9, LNX1, AKT1, NEDD4L, USP22, ITCH, AMFR, FBXW11, TRIP12, HECTD1, UBE2E1	745	119	13528	2.59406	0.898027	0.0345141	1.41393
GOTERM_BP_FAT	GO:0032446~protein modification by small protein conjugation	18	1.90678	0.000906906	UBE2A, DDB1, SAE1, UBE2H, HERC2, TSPAN17, OS9, LNX1, AKT1, PIAS3, NEDD4L, USP22, ITCH, AMFR, FBXW11, TRIP12, HECTD1, UBE2E1	745	132	13528	2.47614	0.926224	0.0370739	1.61277
Annotation Cluster 9	Enrichment Score: 2.8509378083108428
Category	Term	Count	%	PValue	Genes	List Total	Pop Hits	Pop Total	Fold Enrichment	Bonferroni	Benjamini	FDR
GOTERM_BP_FAT	GO:0051969~regulation of transmission of nerve impulse	20	2.11864	0.000443816	EGR1, TF, STX1A, SLC6A1, HTT, MAP1B, GRIN1, CTNND2, ATP2B2, GRM3, SLC1A3, NISCH, PSEN1, GRIA2, RASGRF1, SLC24A2, AGT, NPTN, CAMK2A, CACNA1A	745	147	13528	2.47053	0.720671	0.0233412	0.792339
GOTERM_BP_FAT	GO:0050804~regulation of synaptic transmission	19	2.01271	0.000465835	EGR1, STX1A, SLC6A1, HTT, MAP1B, GRIN1, CTNND2, ATP2B2, GRM3, SLC1A3, NISCH, PSEN1, GRIA2, RASGRF1, SLC24A2, AGT, NPTN, CAMK2A, CACNA1A	745	136	13528	2.53683	0.737802	0.0232116	0.831494
GOTERM_BP_FAT	GO:0048167~regulation of synaptic plasticity	12	1.27119	0.000663508	EGR1, ATP2B2, PSEN1, HTT, RASGRF1, SLC24A2, AGT, GRIN1, MAP1B, CTNND2, NPTN, CAMK2A	745	64	13528	3.4047	0.851459	0.0298146	1.18236
GOTERM_BP_FAT	GO:0031644~regulation of neurological system process	20	2.11864	0.000732504	EGR1, TF, STX1A, SLC6A1, HTT, MAP1B, GRIN1, CTNND2, ATP2B2, GRM3, SLC1A3, NISCH, PSEN1, GRIA2, RASGRF1, SLC24A2, AGT, NPTN, CAMK2A, CACNA1A	745	153	13528	2.37365	0.878185	0.0323594	1.30454
GOTERM_BP_FAT	GO:0044057~regulation of system process	25	2.64831	0.055363	TF, SLC6A1, CTNND2, DMPK, ANXA6, ATP2B2, SLC1A3, NISCH, AGT, SLC24A2, CAMK2A, EGR1, STX1A, HTT, GRIN1, MAP1B, ATP1A1, GRM3, PSEN1, ATP2A2, GRIA2, RASGRF1, SP4, NPTN, CACNA1A	745	309	13528	1.46913	1	0.518328	63.963
Annotation Cluster 10	Enrichment Score: 2.545153980747816
Category	Term	Count	%	PValue	Genes	List Total	Pop Hits	Pop Total	Fold Enrichment	Bonferroni	Benjamini	FDR
GOTERM_BP_FAT	GO:0008219~cell death	62	6.5678	0.000450983	MEF2C, RTN4, ALS2, SPG7, PPARD, PREX1, ATP6AP1, API5L1, BNIP3, PDCD4, PDCD2, AKT1, NISCH, RAD21, SLK, ATXN10, UNC5A, UNC5C, DPP6, CASP2, DHCR24, AIFM1, MADD, ARHGEF12, PNPLA6, DCTN1, PSEN1, RASGRF1, HIPK2, PDCD6IP, KALRN, TNFRSF21, NFKBIA, ZBTB16, SCRIB, TSC22D3, PDE1B, PTK2B, ERCC2, NGEF, DNM1L, ABR, HTT, TMBIM6, GARS, SMAD3, TRIO, DBC1, RAF1, REEP1, STAT1, ITPR1, NCKAP1, ATXN2, MAP1S, UBA1, CYF…	745	719	13528	1.56581	0.726367	0.0232876	0.805085
GOTERM_BP_FAT	GO:0016265~death	62	6.5678	0.000543176	MEF2C, RTN4, ALS2, SPG7, PPARD, PREX1, ATP6AP1, API5L1, BNIP3, PDCD4, PDCD2, AKT1, NISCH, RAD21, SLK, ATXN10, UNC5A, UNC5C, DPP6, CASP2, DHCR24, AIFM1, MADD, ARHGEF12, PNPLA6, DCTN1, PSEN1, RASGRF1, HIPK2, PDCD6IP, KALRN, TNFRSF21, NFKBIA, ZBTB16, SCRIB, TSC22D3, PDE1B, PTK2B, ERCC2, NGEF, DNM1L, ABR, HTT, TMBIM6, GARS, SMAD3, TRIO, DBC1, RAF1, REEP1, STAT1, ITPR1, NCKAP1, ATXN2, MAP1S, UBA1, CYF…	745	724	13528	1.555	0.790067	0.0261102	0.96891
GOTERM_BP_FAT	GO:0006915~apoptosis	47	4.97881	0.01456	MEF2C, RTN4, TNFRSF21, PPARD, PREX1, API5L1, NFKBIA, BNIP3, ZBTB16, PDCD4, SCRIB, PDCD2, AKT1, TSC22D3, NISCH, RAD21, PDE1B, SLK, PTK2B, UNC5A, UNC5C, CASP2, DHCR24, ERCC2, NGEF, DNM1L, ABR, HTT, AIFM1, MADD, TMBIM6, SMAD3, RAF1, TRIO, ARHGEF12, STAT1, NCKAP1, PSEN1, MAP1S, RASGRF1, HIPK2, CYFIP2, PDCD6IP, FAF1, SLC5A11, PUF60, KALRN	745	602	13528	1.41768	1	0.273292	23.113
GOTERM_BP_FAT	GO:0012501~programmed cell death	47	4.97881	0.0184979	MEF2C, RTN4, TNFRSF21, PPARD, PREX1, API5L1, NFKBIA, BNIP3, ZBTB16, PDCD4, SCRIB, PDCD2, AKT1, TSC22D3, NISCH, RAD21, PDE1B, SLK, PTK2B, UNC5A, UNC5C, CASP2, DHCR24, ERCC2, NGEF, DNM1L, ABR, HTT, AIFM1, MADD, TMBIM6, SMAD3, RAF1, TRIO, ARHGEF12, STAT1, NCKAP1, PSEN1, MAP1S, RASGRF1, HIPK2, CYFIP2, PDCD6IP, FAF1, SLC5A11, PUF60, KALRN	745	611	13528	1.3968	1	0.302334	28.4366
Annotation Cluster 11	Enrichment Score: 2.398521059746425
Category	Term	Count	%	PValue	Genes	List Total	Pop Hits	Pop Total	Fold Enrichment	Bonferroni	Benjamini	FDR
GOTERM_BP_FAT	GO:0006836~neurotransmitter transport	17	1.80085	9.66694e-06	SEPT5, SYT1, STX1A, SLC25A4, SLC6A1, NRXN3, SLC6A13, SLC6A15, SLC6A17, RIMS1, SLC1A3, PSEN1, SLC6A7, SYN3, SYN2, SV2A, CACNA1A	745	83	13528	3.71919	0.0273911	0.00346564	0.0173217
GOTERM_BP_FAT	GO:0007269~neurotransmitter secretion	9	0.95339	0.000407935	SEPT5, SYT1, STX1A, PSEN1, NRXN3, SYN3, SYN2, RIMS1, CACNA1A	745	34	13528	4.80663	0.690327	0.0227229	0.728502
GOTERM_BP_FAT	GO:0032940~secretion by cell	24	2.54237	0.00103646	SCAMP1, SEPT5, SYT1, ARFGAP3, STX1A, HTT, NRXN3, GARS, VPS33B, RIMS1, CANX, STXBP5L, CADPS, NISCH, PSEN1, STXBP5, SYN3, SYN2, EXOC4, SYTL2, PCSK6, CACNA1A, SCAMP5, EXOC6B	745	207	13528	2.10532	0.949171	0.0405346	1.84114
GOTERM_BP_FAT	GO:0001505~regulation of neurotransmitter levels	11	1.16525	0.00343029	SEPT5, SYT1, STX1A, SLC1A3, SLC25A4, PSEN1, NRXN3, SYN3, SYN2, RIMS1, CACNA1A	745	67	13528	2.98123	0.999948	0.103889	5.9719
GOTERM_BP_FAT	GO:0006887~exocytosis	15	1.58898	0.00419616	SCAMP1, SEPT5, STX1A, GARS, VPS33B, RIMS1, STXBP5L, CADPS, PSEN1, STXBP5, EXOC4, SYTL2, CACNA1A, SCAMP5, EXOC6B	745	115	13528	2.36849	0.999994	0.119414	7.25842
GOTERM_BP_FAT	GO:0046903~secretion	28	2.9661	0.00810792	SEPT5, SYT1, ARFGAP3, TPD52, VPS33B, CANX, RIMS1, STXBP5L, NISCH, SYN3, AGT, SYN2, EXOC4, NEDD4L, PCSK6, SCAMP5, SCAMP1, STX1A, HTT, NRXN3, GARS, CADPS, PSEN1, STXBP5, SYTL2, PLA2G5, CACNA1A, EXOC6B	745	300	13528	1.69478	1	0.19472	13.5744
GOTERM_BP_FAT	GO:0003001~generation of a signal involved in cell-cell signaling	10	1.05932	0.0434814	SEPT5, SYT1, STX1A, PSEN1, NRXN3, HTT, SYN3, SYN2, RIMS1, CACNA1A	745	85	13528	2.13628	1	0.462054	54.9156
GOTERM_BP_FAT	GO:0016079~synaptic vesicle exocytosis	4	0.423729	0.0459464	SEPT5, STX1A, PSEN1, RIMS1	745	15	13528	4.84224	1	0.468186	56.9528
GOTERM_BP_FAT	GO:0048489~synaptic vesicle transport	4	0.423729	0.271788	SEPT5, STX1A, PSEN1, RIMS1	745	33	13528	2.20102	1	0.878083	99.6599
Annotation Cluster 12	Enrichment Score: 2.148158805132335
Category	Term	Count	%	PValue	Genes	List Total	Pop Hits	Pop Total	Fold Enrichment	Bonferroni	Benjamini	FDR
GOTERM_BP_FAT	GO:0010033~response to organic substance	60	6.35593	0.00138184	ADCY2, SLC6A1, ADCY8, ARNT2, PRDX3, FOXO4, ACTR3, AKT1, CCNE1, DNAJC3, DDOST, ADAM9, EGR1, PPP2R1A, ZCCHC11, LY96, AARS, ADIPOR1, DDIT3, C1QB, GRB10, PIAS3, GNB1, SORT1, AMFR, PLA2G5, EIF2AK4, TF, DERL2, GCLC, NFKBIA, ACP2, ABCA2, EDEM3, TTC3, PTK2B, PRKRA, IDH1, HSPA4, PIK3R3, PIK3R1, WDTC1, CREB1, MAP1B, BCKDHB, TGFBR2, GRIN1, ACACA, SMAD3, SMAD1, STAT1, PCK1, CDH13, ADCY9, TFRC, PRKAR1A, HDAC9…	745	721	13528	1.5111	0.981179	0.0515919	2.44752
GOTERM_BP_FAT	GO:0009719~response to endogenous stimulus	37	3.91949	0.0030465	ADCY2, GCLC, SLC6A1, ADCY8, ARNT2, ABCA2, FOXO4, AKT1, CCNE1, PTK2B, IDH1, PIK3R3, PIK3R1, ADAM9, WDTC1, BCKDHB, MAP1B, AARS, TGFBR2, GRIN1, ADIPOR1, SMAD1, STAT1, DDIT3, PCK1, C1QB, CDH13, GRB10, ADCY9, GNB1, PIAS3, PRKAR1A, SORT1, HDAC9, BMP7, AACS, SST	745	405	13528	1.65891	0.999844	0.0969069	5.32086
GOTERM_BP_FAT	GO:0009725~response to hormone stimulus	31	3.2839	0.0193695	ADCY2, GCLC, SLC6A1, ADCY8, ARNT2, ABCA2, FOXO4, AKT1, CCNE1, PTK2B, IDH1, PIK3R3, PIK3R1, ADAM9, WDTC1, BCKDHB, TGFBR2, MAP1B, ADIPOR1, STAT1, PCK1, C1QB, GRB10, ADCY9, PIAS3, GNB1, PRKAR1A, SORT1, BMP7, HDAC9, SST	745	367	13528	1.53381	1	0.30906	29.5669
GOTERM_BP_FAT	GO:0032870~cellular response to hormone stimulus	14	1.48305	0.0313319	WDTC1, ADCY2, ADCY8, ADIPOR1, STAT1, FOXO4, AKT1, GRB10, ADCY9, GNB1, PRKAR1A, HDAC9, PIK3R3, PIK3R1	745	133	13528	1.91141	1	0.403517	43.4729
Annotation Cluster 13	Enrichment Score: 2.049684378017214
Category	Term	Count	%	PValue	Genes	List Total	Pop Hits	Pop Total	Fold Enrichment	Bonferroni	Benjamini	FDR
GOTERM_BP_FAT	GO:0010035~response to inorganic substance	23	2.43644	0.00206168	SYT1, SEC31A, GCLC, SLC6A1, HTT, MAP1B, GRIA3, PRDX3, ITPR3, STAT1, DDIT3, MT1X, NPC1, SLC1A3, GRIA2, TFRC, PTK2B, GPX3, SLC30A4, CALM3, NEDD4L, CAT, ADAM9	745	205	13528	2.03728	0.99734	0.0723074	3.63079
GOTERM_BP_FAT	GO:0010038~response to metal ion	15	1.58898	0.0113904	SYT1, SEC31A, SLC6A1, HTT, GRIA3, ITPR3, MT1X, NPC1, GRIA2, TFRC, PTK2B, SLC30A4, CALM3, NEDD4L, ADAM9	745	129	13528	2.11144	1	0.241624	18.5587
GOTERM_BP_FAT	GO:0051592~response to calcium ion	8	0.847458	0.0302123	SYT1, SEC31A, SLC6A1, HTT, PTK2B, CALM3, ITPR3, ADAM9	745	55	13528	2.64122	1	0.399186	42.2907
Annotation Cluster 14	Enrichment Score: 1.9805306446910134
Category	Term	Count	%	PValue	Genes	List Total	Pop Hits	Pop Total	Fold Enrichment	Bonferroni	Benjamini	FDR
GOTERM_BP_FAT	GO:0032535~regulation of cellular component size	34	3.60169	1.48385e-05	RTN4, ALS2, DERL2, ACTR3B, CAPZA2, AKT1, ACTR3, ATP2B2, NDRG3, NDRG4, PTK2B, MTPN, SEMA3F, RB1CC1, AGT, ENO1, MAP2K5, PPP2R1A, WDTC1, LIMK1, CREB1, SPTBN4, MAP1B, SMAD4, SMAD3, ADIPOR1, EPB49, NEBL, NOTCH2, NUPR1, CYFIP1, CACNA1A, SPTAN1, ADD1	745	271	13528	2.27817	0.0417354	0.00425406	0.0265872
GOTERM_BP_FAT	GO:0008361~regulation of cell size	25	2.64831	0.000410123	RTN4, DERL2, AKT1, ATP2B2, NDRG3, NDRG4, PTK2B, AGT, MTPN, SEMA3F, RB1CC1, ENO1, MAP2K5, PPP2R1A, WDTC1, LIMK1, CREB1, MAP1B, SMAD4, ADIPOR1, SMAD3, NOTCH2, NUPR1, CYFIP1, CACNA1A	745	206	13528	2.20369	0.692267	0.022409	0.732395
GOTERM_BP_FAT	GO:0001558~regulation of cell growth	18	1.90678	0.0389239	RTN4, PPP2R1A, DERL2, LIMK1, MAP1B, SMAD4, SMAD3, ADIPOR1, CHAD, AKT1, CDH13, NDRG3, PTK2B, AGT, SEMA3F, ITCH, MAP2K5, ENO1	745	194	13528	1.6848	1	0.444537	50.907
GOTERM_BP_FAT	GO:0040008~regulation of growth	27	2.86017	0.0571517	RTN4, DERL2, NELL2, CHAD, AKT1, NDRG3, PTK2B, SEMA3F, AGT, ITCH, BRMS1L, ENO1, MAP2K5, PPP2R1A, LIMK1, CREB1, TGFBR2, ATRN, MAP1B, SPTBN4, SMAD4, SMAD3, ADIPOR1, CDH13, BBS2, ATXN2, PCSK1N	745	341	13528	1.43776	1	0.522085	65.1665
GOTERM_BP_FAT	GO:0045926~negative regulation of growth	11	1.16525	0.0806562	RTN4, ATXN2, PPP2R1A, BBS2, NDRG3, SEMA3F, AGT, SMAD4, SMAD3, ADIPOR1, ENO1	745	110	13528	1.81584	1	0.610842	77.8423
GOTERM_BP_FAT	GO:0045792~negative regulation of cell size	10	1.05932	0.0942273	RTN4, AKT1, PPP2R1A, NDRG3, SEMA3F, AGT, SMAD4, SMAD3, ADIPOR1, ENO1	745	99	13528	1.83418	1	0.647078	83.026
GOTERM_BP_FAT	GO:0030308~negative regulation of cell growth	9	0.95339	0.133021	RTN4, PPP2R1A, NDRG3, SEMA3F, AGT, SMAD4, SMAD3, ADIPOR1, ENO1	745	92	13528	1.77636	1	0.730236	92.2534
Annotation Cluster 15	Enrichment Score: 1.8828682274828243
Category	Term	Count	%	PValue	Genes	List Total	Pop Hits	Pop Total	Fold Enrichment	Bonferroni	Benjamini	FDR
GOTERM_BP_FAT	GO:0006811~ion transport	62	6.5678	0.0023071	SLC44A1, ATP1B1, KCNAB2, ATP1B2, ATP6AP1, GRIK4, SLC26A1, SLC26A11, ATP2B2, SLC1A3, SLC24A2, SLCO1C1, ANO5, SLC4A4, IBTK, SVOP, SLC25A4, PRKCB, ATP6V1A, SLC26A6, KCNT1, PSEN1, TMCO3, TF, SCN1B, CACNB3, ATP6V1B2, TPCN1, ANXA6, TTYH1, SLC30A4, SLC30A3, NEDD4L, CAMK2A, SLC30A9, MLC1, SLC8A2, HTT, NDUFA9, GRIN1, ATP1A3, GRIA3, KCTD3, ATP1A1, ITPR3, KCNK1, CACNA2D3, ANKH, ITPR1, ATP13A4, GRIA2, ATP2A2…	745	768	13528	1.46591	0.998688	0.0768386	4.0546
GOTERM_BP_FAT	GO:0006812~cation transport	47	4.97881	0.00326493	TF, SLC44A1, ATP1B1, SCN1B, KCNAB2, ATP1B2, ATP6AP1, CACNB3, ATP6V1B2, TPCN1, ANXA6, ATP2B2, SLC24A2, TTYH1, SLC30A4, SLC30A3, NEDD4L, SLC4A4, SLC30A9, CAMK2A, IBTK, SLC8A2, NDUFA9, GRIN1, ATP1A3, KCTD3, ATP1A1, ITPR3, KCNK1, CACNA2D3, ITPR1, PRKCB, ATP13A4, ATP6V1A, KCNT1, ATP2A2, PSEN1, ATP6V1E1, SCN4B, ATP6V0A1, CACNA1E, SCN8A, ATP5A1, TMCO3, SLC5A11, CACNA1A, CACNA1B	745	553	13528	1.5433	0.999917	0.101265	5.69191
GOTERM_BP_FAT	GO:0006816~calcium ion transport	17	1.80085	0.00497823	IBTK, SLC8A2, GRIN1, CACNB3, CACNA2D3, ITPR3, ITPR1, TPCN1, PRKCB, ANXA6, ATP2B2, ATP2A2, SLC24A2, CACNA1E, CAMK2A, CACNA1A, CACNA1B	745	142	13528	2.17389	0.999999	0.134831	8.55501
GOTERM_BP_FAT	GO:0015674~di-, tri-valent inorganic cation transport	19	2.01271	0.0082413	IBTK, TF, SLC8A2, GRIN1, CACNB3, CACNA2D3, ITPR3, ITPR1, TPCN1, PRKCB, ANXA6, ATP2B2, ATP2A2, SLC24A2, TTYH1, CACNA1E, CAMK2A, CACNA1A, CACNA1B	745	176	13528	1.96028	1	0.195973	13.7824
GOTERM_BP_FAT	GO:0030001~metal ion transport	37	3.91949	0.0244421	TF, ATP1B1, SCN1B, KCNAB2, ATP1B2, CACNB3, TPCN1, ANXA6, ATP2B2, SLC24A2, TTYH1, SLC30A4, NEDD4L, SLC30A3, SLC4A4, SLC30A9, CAMK2A, IBTK, SLC8A2, NDUFA9, GRIN1, ATP1A3, KCTD3, ATP1A1, ITPR3, KCNK1, CACNA2D3, ITPR1, PRKCB, KCNT1, ATP2A2, SCN4B, CACNA1E, SCN8A, SLC5A11, CACNA1A, CACNA1B	745	465	13528	1.44486	1	0.356981	35.8178
GOTERM_BP_FAT	GO:0006814~sodium ion transport	13	1.37712	0.0542257	ATP1B1, SLC8A2, SCN1B, NDUFA9, ATP1B2, ATP1A3, ATP1A1, SLC24A2, SCN4B, SCN8A, NEDD4L, SLC4A4, SLC5A11	745	130	13528	1.81584	1	0.512403	63.1776
GOTERM_BP_FAT	GO:0015672~monovalent inorganic cation transport	23	2.43644	0.161275	ATP1B1, SCN1B, SLC8A2, KCNAB2, ATP1B2, NDUFA9, ATP6AP1, ATP1A3, KCTD3, ATP1A1, ATP6V1B2, KCNK1, ATP6V1A, KCNT1, SLC24A2, ATP6V1E1, ATP6V0A1, SCN4B, NEDD4L, ATP5A1, SCN8A, SLC4A4, SLC5A11	745	318	13528	1.31334	1	0.770793	95.7218
Annotation Cluster 16	Enrichment Score: 1.8446647639949043
Category	Term	Count	%	PValue	Genes	List Total	Pop Hits	Pop Total	Fold Enrichment	Bonferroni	Benjamini	FDR
GOTERM_BP_FAT	GO:0043065~positive regulation of apoptosis	37	3.91949	0.0079222	SH3RF1, PREX1, NELL1, BNIP3, RPS27L, ZBTB16, SCRIB, SERINC3, AKT1, AGT, PRKRA, CASP2, ERCC2, MSH6, NGEF, PPP2R1A, ABR, HTT, ARHGEF7, AIFM1, NF1, GRIN1, SMAD3, TRIO, STAT1, ARHGEF12, DDIT3, NOTCH2, NUPR1, PSEN1, RASGRF1, HIPK2, SORT1, FAF1, BMP7, SST, KALRN	745	430	13528	1.56247	1	0.192298	13.2839
GOTERM_BP_FAT	GO:0043068~positive regulation of programmed cell death	37	3.91949	0.00858082	SH3RF1, PREX1, NELL1, BNIP3, RPS27L, ZBTB16, SCRIB, SERINC3, AKT1, AGT, PRKRA, CASP2, ERCC2, MSH6, NGEF, PPP2R1A, ABR, HTT, ARHGEF7, AIFM1, NF1, GRIN1, SMAD3, TRIO, STAT1, ARHGEF12, DDIT3, NOTCH2, NUPR1, PSEN1, RASGRF1, HIPK2, SORT1, FAF1, BMP7, SST, KALRN	745	433	13528	1.55164	1	0.20155	14.3098
GOTERM_BP_FAT	GO:0010942~positive regulation of cell death	37	3.91949	0.0093545	SH3RF1, PREX1, NELL1, BNIP3, RPS27L, ZBTB16, SCRIB, SERINC3, AKT1, AGT, PRKRA, CASP2, ERCC2, MSH6, NGEF, PPP2R1A, ABR, HTT, ARHGEF7, AIFM1, NF1, GRIN1, SMAD3, TRIO, STAT1, ARHGEF12, DDIT3, NOTCH2, NUPR1, PSEN1, RASGRF1, HIPK2, SORT1, FAF1, BMP7, SST, KALRN	745	435	13528	1.54451	1	0.21255	15.5002
GOTERM_BP_FAT	GO:0010941~regulation of cell death	61	6.46186	0.0122347	MEF2C, RTN4, SH3RF1, PREX1, NELL1, API5L1, ARNT2, BNIP3, RPS27L, PRDX3, CITED2, AKT1, CAT, CASP2, DHCR24, ADAM9, PPP2R1A, SLC25A4, AIFM1, MADD, ARHGEF7, AARS, ARHGEF12, DDIT3, PSEN1, RASGRF1, IGF2R, TXNDC5, HIPK2, SORT1, CTSB, KALRN, GCLC, NFKBIA, ZBTB16, SCRIB, SERINC3, AGT, RB1CC1, PRKRA, PCSK6, ERCC2, MSH6, NGEF, ABR, HTT, CREB1, TMBIM6, NF1, GRIN1, SMAD3, TRIO, STAT1, NOTCH2, CDH13, NUPR1, CF…	745	815	13528	1.35909	1	0.246433	19.7962
GOTERM_BP_FAT	GO:0042981~regulation of apoptosis	60	6.35593	0.0135362	MEF2C, RTN4, SH3RF1, PREX1, NELL1, API5L1, ARNT2, BNIP3, RPS27L, PRDX3, CITED2, AKT1, CAT, CASP2, DHCR24, ADAM9, PPP2R1A, AIFM1, MADD, ARHGEF7, AARS, ARHGEF12, DDIT3, PSEN1, RASGRF1, IGF2R, TXNDC5, HIPK2, SORT1, CTSB, KALRN, GCLC, NFKBIA, ZBTB16, SCRIB, SERINC3, AGT, RB1CC1, PRKRA, PCSK6, ERCC2, MSH6, NGEF, ABR, HTT, CREB1, TMBIM6, NF1, GRIN1, SMAD3, TRIO, STAT1, NOTCH2, CDH13, NUPR1, CFDP1, FAF1…	745	804	13528	1.3551	1	0.265311	21.6688
GOTERM_BP_FAT	GO:0043067~regulation of programmed cell death	60	6.35593	0.0164213	MEF2C, RTN4, SH3RF1, PREX1, NELL1, API5L1, ARNT2, BNIP3, RPS27L, PRDX3, CITED2, AKT1, CAT, CASP2, DHCR24, ADAM9, PPP2R1A, AIFM1, MADD, ARHGEF7, AARS, ARHGEF12, DDIT3, PSEN1, RASGRF1, IGF2R, TXNDC5, HIPK2, SORT1, CTSB, KALRN, GCLC, NFKBIA, ZBTB16, SCRIB, SERINC3, AGT, RB1CC1, PRKRA, PCSK6, ERCC2, MSH6, NGEF, ABR, HTT, CREB1, TMBIM6, NF1, GRIN1, SMAD3, TRIO, STAT1, NOTCH2, CDH13, NUPR1, CFDP1, FAF1…	745	812	13528	1.34175	1	0.288078	25.6742
GOTERM_BP_FAT	GO:0006917~induction of apoptosis	28	2.9661	0.017826	SH3RF1, NELL1, PREX1, BNIP3, RPS27L, SERINC3, PRKRA, CASP2, ERCC2, PPP2R1A, NGEF, MSH6, ABR, ARHGEF7, AIFM1, HTT, TRIO, SMAD3, STAT1, ARHGEF12, NOTCH2, PSEN1, NUPR1, RASGRF1, HIPK2, SORT1, SST, KALRN	745	320	13528	1.58886	1	0.299799	27.5537
GOTERM_BP_FAT	GO:0012502~induction of programmed cell death	28	2.9661	0.0184464	SH3RF1, NELL1, PREX1, BNIP3, RPS27L, SERINC3, PRKRA, CASP2, ERCC2, PPP2R1A, NGEF, MSH6, ABR, ARHGEF7, AIFM1, HTT, TRIO, SMAD3, STAT1, ARHGEF12, NOTCH2, PSEN1, NUPR1, RASGRF1, HIPK2, SORT1, SST, KALRN	745	321	13528	1.58391	1	0.30332	28.3693
GOTERM_BP_FAT	GO:0008624~induction of apoptosis by extracellular signals	12	1.27119	0.0439699	NGEF, ABR, PSEN1, ARHGEF7, RASGRF1, PREX1, TRIO, SORT1, ARHGEF12, SST, CASP2, KALRN	745	112	13528	1.94554	1	0.462642	55.3264
Annotation Cluster 17	Enrichment Score: 1.8374132791618532
Category	Term	Count	%	PValue	Genes	List Total	Pop Hits	Pop Total	Fold Enrichment	Bonferroni	Benjamini	FDR
GOTERM_BP_FAT	GO:0034976~response to endoplasmic reticulum stress	9	0.95339	0.000407935	DERL2, COL4A3BP, AARS, CCDC47, AMFR, DDIT3, EIF2AK4, OS9, SCAMP5	745	34	13528	4.80663	0.690327	0.0227229	0.728502
GOTERM_BP_FAT	GO:0006984~ER-nuclear signaling pathway	7	0.741525	0.0112141	DERL2, ATP2A2, AARS, CCDC47, AMFR, DDIT3, EIF2AK4	745	35	13528	3.63168	1	0.240107	18.298
GOTERM_BP_FAT	GO:0034620~cellular response to unfolded protein	5	0.529661	0.0256973	DERL2, AARS, AMFR, DDIT3, EIF2AK4	745	21	13528	4.32343	1	0.361009	37.2816
GOTERM_BP_FAT	GO:0030968~endoplasmic reticulum unfolded protein response	5	0.529661	0.0256973	DERL2, AARS, AMFR, DDIT3, EIF2AK4	745	21	13528	4.32343	1	0.361009	37.2816
GOTERM_BP_FAT	GO:0051789~response to protein stimulus	12	1.27119	0.0331025	EGR1, ACTR3, DERL2, MAP1B, AARS, HSPA4, AMFR, EDEM3, DNAJC3, DDIT3, TTC3, EIF2AK4	745	107	13528	2.03645	1	0.412213	45.2962
GOTERM_BP_FAT	GO:0006986~response to unfolded protein	8	0.847458	0.0945214	DERL2, AARS, HSPA4, AMFR, EDEM3, DNAJC3, DDIT3, EIF2AK4	745	71	13528	2.04602	1	0.646938	83.1245
Annotation Cluster 18	Enrichment Score: 1.8319161429711872
Category	Term	Count	%	PValue	Genes	List Total	Pop Hits	Pop Total	Fold Enrichment	Bonferroni	Benjamini	FDR
GOTERM_BP_FAT	GO:0048167~regulation of synaptic plasticity	12	1.27119	0.000663508	EGR1, ATP2B2, PSEN1, HTT, RASGRF1, SLC24A2, AGT, GRIN1, MAP1B, CTNND2, NPTN, CAMK2A	745	64	13528	3.4047	0.851459	0.0298146	1.18236
GOTERM_BP_FAT	GO:0048168~regulation of neuronal synaptic plasticity	6	0.635593	0.0455847	EGR1, RASGRF1, AGT, GRIN1, NPTN, CAMK2A	745	36	13528	3.0264	1	0.470212	56.6595
GOTERM_BP_FAT	GO:0048169~regulation of long-term neuronal synaptic plasticity	4	0.423729	0.105581	EGR1, AGT, GRIN1, NPTN	745	21	13528	3.45874	1	0.675287	86.4601
Annotation Cluster 19	Enrichment Score: 1.7617928420458469
Category	Term	Count	%	PValue	Genes	List Total	Pop Hits	Pop Total	Fold Enrichment	Bonferroni	Benjamini	FDR
GOTERM_BP_FAT	GO:0043524~negative regulation of neuron apoptosis	10	1.05932	0.00166374	GCLC, PSEN1, HTT, AGT, HIPK2, GRIN1, AARS, PRDX3, PCSK6, CACNA1A	745	51	13528	3.56047	0.991637	0.060238	2.93982
GOTERM_BP_FAT	GO:0043523~regulation of neuron apoptosis	13	1.37712	0.003706	GCLC, HTT, AARS, GRIN1, NF1, PRDX3, PSEN1, AGT, HIPK2, PCSK6, CACNA1A, DHCR24, ADAM9	745	90	13528	2.62288	0.999977	0.107278	6.43696
GOTERM_BP_FAT	GO:0010941~regulation of cell death	61	6.46186	0.0122347	MEF2C, RTN4, SH3RF1, PREX1, NELL1, API5L1, ARNT2, BNIP3, RPS27L, PRDX3, CITED2, AKT1, CAT, CASP2, DHCR24, ADAM9, PPP2R1A, SLC25A4, AIFM1, MADD, ARHGEF7, AARS, ARHGEF12, DDIT3, PSEN1, RASGRF1, IGF2R, TXNDC5, HIPK2, SORT1, CTSB, KALRN, GCLC, NFKBIA, ZBTB16, SCRIB, SERINC3, AGT, RB1CC1, PRKRA, PCSK6, ERCC2, MSH6, NGEF, ABR, HTT, CREB1, TMBIM6, NF1, GRIN1, SMAD3, TRIO, STAT1, NOTCH2, CDH13, NUPR1, CF…	745	815	13528	1.35909	1	0.246433	19.7962
GOTERM_BP_FAT	GO:0042981~regulation of apoptosis	60	6.35593	0.0135362	MEF2C, RTN4, SH3RF1, PREX1, NELL1, API5L1, ARNT2, BNIP3, RPS27L, PRDX3, CITED2, AKT1, CAT, CASP2, DHCR24, ADAM9, PPP2R1A, AIFM1, MADD, ARHGEF7, AARS, ARHGEF12, DDIT3, PSEN1, RASGRF1, IGF2R, TXNDC5, HIPK2, SORT1, CTSB, KALRN, GCLC, NFKBIA, ZBTB16, SCRIB, SERINC3, AGT, RB1CC1, PRKRA, PCSK6, ERCC2, MSH6, NGEF, ABR, HTT, CREB1, TMBIM6, NF1, GRIN1, SMAD3, TRIO, STAT1, NOTCH2, CDH13, NUPR1, CFDP1, FAF1…	745	804	13528	1.3551	1	0.265311	21.6688
GOTERM_BP_FAT	GO:0043067~regulation of programmed cell death	60	6.35593	0.0164213	MEF2C, RTN4, SH3RF1, PREX1, NELL1, API5L1, ARNT2, BNIP3, RPS27L, PRDX3, CITED2, AKT1, CAT, CASP2, DHCR24, ADAM9, PPP2R1A, AIFM1, MADD, ARHGEF7, AARS, ARHGEF12, DDIT3, PSEN1, RASGRF1, IGF2R, TXNDC5, HIPK2, SORT1, CTSB, KALRN, GCLC, NFKBIA, ZBTB16, SCRIB, SERINC3, AGT, RB1CC1, PRKRA, PCSK6, ERCC2, MSH6, NGEF, ABR, HTT, CREB1, TMBIM6, NF1, GRIN1, SMAD3, TRIO, STAT1, NOTCH2, CDH13, NUPR1, CFDP1, FAF1…	745	812	13528	1.34175	1	0.288078	25.6742
GOTERM_BP_FAT	GO:0060548~negative regulation of cell death	30	3.17797	0.0253191	MEF2C, GCLC, ARNT2, API5L1, NFKBIA, BNIP3, PRDX3, CITED2, AKT1, AGT, RB1CC1, CAT, PCSK6, CASP2, ERCC2, DHCR24, SLC25A4, HTT, TMBIM6, GRIN1, AARS, SMAD3, NOTCH2, CDH13, PSEN1, TXNDC5, HIPK2, SORT1, CFDP1, CACNA1A	745	360	13528	1.5132	1	0.36016	36.8439
GOTERM_BP_FAT	GO:0043066~negative regulation of apoptosis	29	3.07203	0.034205	MEF2C, GCLC, ARNT2, API5L1, NFKBIA, BNIP3, PRDX3, CITED2, AKT1, AGT, RB1CC1, CAT, PCSK6, CASP2, ERCC2, DHCR24, HTT, TMBIM6, GRIN1, AARS, SMAD3, CDH13, NOTCH2, PSEN1, TXNDC5, HIPK2, SORT1, CFDP1, CACNA1A	745	354	13528	1.48755	1	0.417539	46.4033
GOTERM_BP_FAT	GO:0043069~negative regulation of programmed cell death	29	3.07203	0.0392958	MEF2C, GCLC, ARNT2, API5L1, NFKBIA, BNIP3, PRDX3, CITED2, AKT1, AGT, RB1CC1, CAT, PCSK6, CASP2, ERCC2, DHCR24, HTT, TMBIM6, GRIN1, AARS, SMAD3, CDH13, NOTCH2, PSEN1, TXNDC5, HIPK2, SORT1, CFDP1, CACNA1A	745	359	13528	1.46683	1	0.442696	51.2463
GOTERM_BP_FAT	GO:0006916~anti-apoptosis	15	1.58898	0.244056	MEF2C, GCLC, HTT, API5L1, NFKBIA, BNIP3, CITED2, AKT1, CDH13, NOTCH2, PSEN1, TXNDC5, CFDP1, CASP2, DHCR24	745	206	13528	1.32221	1	0.856529	99.3354
Annotation Cluster 20	Enrichment Score: 1.755039734137138
Category	Term	Count	%	PValue	Genes	List Total	Pop Hits	Pop Total	Fold Enrichment	Bonferroni	Benjamini	FDR
GOTERM_BP_FAT	GO:0010970~microtubule-based transport	9	0.95339	0.000123123	DYNC1I1, SPG7, KIF1A, KIF1B, KIF5B, MAP1S, HTT, PAFAH1B1, LRPPRC	745	29	13528	5.63536	0.297952	0.00926611	0.220406
GOTERM_BP_FAT	GO:0030705~cytoskeleton-dependent intracellular transport	9	0.95339	0.00707225	DYNC1I1, SPG7, KIF1A, KIF1B, KIF5B, MAP1S, HTT, PAFAH1B1, LRPPRC	745	52	13528	3.1428	1	0.178041	11.9429
GOTERM_BP_FAT	GO:0007018~microtubule-based movement	14	1.48305	0.00908725	DYNC1I1, SPG7, KIF5B, HTT, KIF5C, KIF3C, KIF1A, KIF1B, MAP1S, PAFAH1B1, TUBA1A, DYNC1H1, TUBB3, LRPPRC	745	113	13528	2.24971	1	0.21044	15.0908
GOTERM_BP_FAT	GO:0047496~vesicle transport along microtubule	4	0.423729	0.0108417	DYNC1I1, KIF5B, HTT, PAFAH1B1	745	9	13528	8.0704	1	0.234846	17.7448
GOTERM_BP_FAT	GO:0008088~axon cargo transport	5	0.529661	0.0149654	SPG7, KIF1A, KIF1B, HTT, PAFAH1B1	745	18	13528	5.044	1	0.271093	23.6779
GOTERM_BP_FAT	GO:0047497~mitochondrion transport along microtubule	3	0.317797	0.0390807	KIF1B, MAP1S, LRPPRC	745	6	13528	9.07919	1	0.442529	51.0503
GOTERM_BP_FAT	GO:0051654~establishment of mitochondrion localization	3	0.317797	0.0390807	KIF1B, MAP1S, LRPPRC	745	6	13528	9.07919	1	0.442529	51.0503
GOTERM_BP_FAT	GO:0008089~anterograde axon cargo transport	3	0.317797	0.0390807	SPG7, KIF1A, KIF1B	745	6	13528	9.07919	1	0.442529	51.0503
GOTERM_BP_FAT	GO:0034643~mitochondrion localization, microtubule-mediated	3	0.317797	0.0390807	KIF1B, MAP1S, LRPPRC	745	6	13528	9.07919	1	0.442529	51.0503
GOTERM_BP_FAT	GO:0007017~microtubule-based process	20	2.11864	0.104621	DYNC1I1, SPG7, KIF5B, HTT, KIF5C, MAP1B, KIF3C, BBS2, KIF1A, KIF1B, MAP1S, MAP2, TNKS, PAFAH1B1, DYNC1H1, TUBA1A, NCOR1, LRPPRC, TUBB3, RANBP10	745	253	13528	1.43545	1	0.674331	86.1973
GOTERM_BP_FAT	GO:0051646~mitochondrion localization	3	0.317797	0.157972	KIF1B, MAP1S, LRPPRC	745	13	13528	4.1904	1	0.767111	95.4095
The NCBI tool, DAVID, was used to investigate functional associations of gene expression changes seen in AD frontal lobe. There were 944 genes that were more than two-fold over- or under-expressed in AD relative to normal frontal lobe and these were analysed by the functional clustering tool. Gene Ontology Biological Process was selected as the annotation category for clustering. Once the tool ha…
