# Supplementary material for: Whole Transcriptome Sequencing Reveals Gene Expression and Splicing Differences in Brain Regions Affected by Alzheimer's Disease
Source: PLoS One. 2011 Jan 21;6(1):e16266. doi: 10.1371/journal.pone.0016266 (PMC3025006; doi:10.1371/journal.pone.0016266)
Supplement: Table S6 — Top 20 Clusters from functional enrichment analysis using the DAVID tool for temporal lobe. The NCBI tool, DAVID, was used to investigate functional associations of gene expression changes seen in AD temporal lobe. There were 1416 genes that were more than two-fold over- or under-expressed in AD relative to normal temporal lobe and these were analysed by the functional clustering tool. Gene Ontology Biological Process was selected as the annotation category for clustering. Once the tool has identified enriched ontologies for a particular gene list, it creates annotation clusters with those that have a statistically significant overlap in terms of their constituent genes. The top 20 annotation clusters are shown in this table. (XLSX) [file pone.0016266.s006.xlsx]

## Sheet: Sheet1
Table S6. Top 20 Clusters from functional enrichment analysis using the DAVID tool for temporal lobe.
Annotation Cluster 1	Enrichment Score: 4.857838970757411
Category	Term	Count	%	PValue	Genes	List Total	Pop Hits	Pop Total	Fold Enrichment	Bonferroni	Benjamini	FDR
GOTERM_BP_FAT	GO:0046907~intracellular transport	95	6.70904	3.91238e-08	COPA, XPO1, CLTA, AP1G2, XPO6, PDIA3, AP1G1, ATP6AP1, C16ORF70, TIMM17B, TGFB3, CSPG5, APP, GBF1, APOE, RAE1, VPS4B, STAM, SEC24C, DYNC1I1, STX6, SCAMP1, OPA1, IPO9, OPTN, HERC2, MYH9, RPH3A, CDK5, FLNA, BCAP31, KIF1C, ANKRD27, NPC1, KIF1A, KIF1B, PSEN1, ATP2C1, IPO7, ARCN1, C3ORF31, USO1, RAB14, SORT1, AKAP6, TOMM22, GNAS, TRAPPC1, SH3GL2, MYO5A, MYL6, SNX9, NUP98, NFKBIA, NAPA, EEA1, DTNBP1, RI…	1104	657	13528	1.77183	0.000128865	6.44348e-05	7.11826e-05
GOTERM_BP_FAT	GO:0045184~establishment of protein localization	96	6.77966	2.33588e-05	COPA, XPO1, CLTA, AP1G2, XPO6, PDIA3, AP1G1, CHMP4B, ATP6AP1, TIMM17B, C16ORF70, TGFB3, NUP188, SELENBP1, FAM125A, TRIM3, SEH1L, ATG7, VPS4B, STAM, SEC24C, STX6, SCAMP1, NUP88, RINT1, IPO9, STXBP3, OPTN, HERC2, MYH9, RPH3A, CDK5, FLNA, BCAP31, PSEN1, IPO7, ARCN1, C3ORF31, USO1, RAB14, SORT1, AKAP6, TOMM22, GNAS, RAB13, SNX9, NUP98, NUP93, NFKBIA, NAPA, ARF5, LMAN2, RIMS1, NUP214, UEVLD, MIA3, WDR…	1104	769	13528	1.52971	0.0740591	0.00590135	0.0424909
GOTERM_BP_FAT	GO:0006886~intracellular protein transport	55	3.88418	2.51238e-05	XPO1, COPA, CLTA, XPO6, PDIA3, AP1G2, AP1G1, ATP6AP1, C16ORF70, TIMM17B, TGFB3, STAM, SEC24C, STX6, IPO9, OPTN, HERC2, RPH3A, CDK5, BCAP31, IPO7, C3ORF31, ARCN1, USO1, SORT1, AKAP6, TOMM22, SNX9, NUP98, NFKBIA, NAPA, RIMS1, WDR19, NUP214, ACD, STX12, AP3M2, STX18, CHM, APBA1, SEC61A2, SRP54, STRADA, PPIH, VCP, TOM1L2, AP2A1, TSC2, PCNA, NOP58, HGS, TRPC4AP, LGTN, SSR4, COG2	1104	374	13528	1.802	0.0794268	0.00589391	0.0457008
GOTERM_BP_FAT	GO:0015031~protein transport	95	6.70904	2.74472e-05	COPA, XPO1, CLTA, AP1G2, XPO6, PDIA3, AP1G1, CHMP4B, ATP6AP1, TIMM17B, C16ORF70, TGFB3, NUP188, SELENBP1, FAM125A, TRIM3, SEH1L, ATG7, VPS4B, STAM, SEC24C, STX6, SCAMP1, NUP88, RINT1, IPO9, STXBP3, OPTN, HERC2, MYH9, RPH3A, CDK5, BCAP31, PSEN1, IPO7, ARCN1, C3ORF31, USO1, RAB14, SORT1, AKAP6, TOMM22, GNAS, RAB13, SNX9, NUP98, NUP93, NFKBIA, NAPA, ARF5, LMAN2, RIMS1, NUP214, UEVLD, MIA3, WDR19, AC…	1104	762	13528	1.52768	0.0864457	0.00563484	0.0499262
GOTERM_BP_FAT	GO:0070727~cellular macromolecule localization	59	4.16667	3.1143e-05	XPO1, COPA, CLTA, XPO6, PDIA3, AP1G2, AP1G1, ATP6AP1, TIMM17B, C16ORF70, TGFB3, STAM, SEC24C, STX6, PTPRK, IPO9, OPTN, HERC2, PTPRU, RPH3A, CDK5, FLNA, BCAP31, IPO7, C3ORF31, ARCN1, USO1, SORT1, AKAP6, TOMM22, SNX9, NUP98, NFKBIA, NAPA, RIMS1, STAU1, NUP214, WDR19, ACD, STX12, AP3M2, STX18, CHM, APBA1, SEC61A2, SRP54, STRADA, PPIH, VCP, TOM1L2, AP2A1, TSC2, PCNA, NOP58, HGS, TRPC4AP, LGTN, SSR4, …	1104	414	13528	1.74629	0.0975	0.00601633	0.056647
GOTERM_BP_FAT	GO:0034613~cellular protein localization	58	4.09605	4.86058e-05	XPO1, COPA, CLTA, XPO6, PDIA3, AP1G2, AP1G1, ATP6AP1, TIMM17B, C16ORF70, TGFB3, STAM, SEC24C, STX6, PTPRK, IPO9, OPTN, HERC2, PTPRU, RPH3A, CDK5, FLNA, BCAP31, IPO7, C3ORF31, ARCN1, USO1, SORT1, AKAP6, TOMM22, SNX9, NUP98, NFKBIA, NAPA, RIMS1, NUP214, WDR19, ACD, STX12, AP3M2, STX18, CHM, APBA1, SEC61A2, SRP54, STRADA, PPIH, VCP, TOM1L2, AP2A1, TSC2, PCNA, NOP58, HGS, TRPC4AP, LGTN, SSR4, COG2	1104	411	13528	1.72922	0.147951	0.0083915	0.0883973
GOTERM_BP_FAT	GO:0008104~protein localization	104	7.34463	0.000103658	XPO1, XPO6, AP1G2, AP1G1, CHMP4B, ATP6AP1, C16ORF70, TGFB3, SELENBP1, FAM125A, VPS13C, ATG7, VPS4B, STAM, SCAMP1, PTPRK, RINT1, GRIN2A, OPTN, PTPRU, MYH9, RPH3A, BCAP31, USO1, RAB14, AKAP6, RAB13, SNX9, NFKBIA, NAPA, LMAN2, ARF5, RIMS1, MIA3, STX12, ACD, STX18, DOPEY1, SEC61A2, ABCB9, PRAF2, SRP54, EPS15, PPIH, VCP, CADPS2, ARF4, TSC2, PCNA, HGS, LGTN, ATG16L2, COPA, CLTA, PDIA3, TIMM17B, NUP188,…	1104	882	13528	1.44487	0.289274	0.0161289	0.18843
Annotation Cluster 2	Enrichment Score: 4.549452505432495
Category	Term	Count	%	PValue	Genes	List Total	Pop Hits	Pop Total	Fold Enrichment	Bonferroni	Benjamini	FDR
GOTERM_BP_FAT	GO:0016192~vesicle-mediated transport	88	6.21469	1.04773e-08	COPA, CLTA, LDLR, AP1G2, HIP1R, AP1G1, C16ORF70, SORL1, ITSN2, TSNARE1, APP, ANK1, PICALM, GBF1, APOE, VPS4B, RAPGEF4, SEC24C, STX6, SCAMP1, CLN3, PLD2, ICAM5, RINT1, ATP6V1H, STXBP3, OPTN, CDK5, FLNA, LRPAP1, BCAP31, KIF1C, ANKRD27, NPC1, DOC2A, GAPVD1, PSEN1, ARCN1, USO1, RAB14, RIN1, SORT1, RAB13, TRAPPC1, TRAPPC10, SH3GL2, EPN1, UNC13A, SH3GL1, RABEPK, NAPA, EEA1, ARF5, ARFGEF1, DTNBP1, RIMS1…	1104	576	13528	1.87208	3.45116e-05	3.45116e-05	1.90626e-05
GOTERM_BP_FAT	GO:0016044~membrane organization	52	3.67232	0.000288639	COPA, CLTA, LDLR, HIP1R, AP1G1, SORL1, ITSN2, APP, PICALM, GBF1, APOE, ATG7, GNPAT, SEC24C, SCAMP1, STX6, PLD2, CLN3, CCDC88A, OPA1, ICAM5, ATP6V1H, CDK5, NPC1, GAPVD1, ARCN1, USO1, RIN1, SORT1, TOMM22, EPN1, SH3GL2, SH3GL1, RABEPK, NAPA, EEA1, RIMS1, DTNBP1, APLP1, ITGAV, ZMPSTE24, HIP1, ELMOD1, DNM3, LRSAM1, MAL, LRP1, AP2A1, JMJD6, TSC2, MYH10, DNM2	1104	381	13528	1.67241	0.613612	0.0312	0.523853
GOTERM_BP_FAT	GO:0006897~endocytosis	34	2.40113	0.000457924	LDLR, AP1G1, HIP1R, SORL1, RABEPK, EEA1, ITSN2, APLP1, APP, PICALM, APOE, ITGAV, HIP1, ELMOD1, SCAMP1, PLD2, CLN3, DNM3, LRSAM1, ICAM5, ATP6V1H, CDK5, NPC1, LRP1, GAPVD1, JMJD6, AP2A1, TSC2, RIN1, SORT1, SH3GL2, EPN1, SH3GL1, DNM2	1104	220	13528	1.89374	0.778813	0.0434048	0.829884
GOTERM_BP_FAT	GO:0010324~membrane invagination	34	2.40113	0.000457924	LDLR, AP1G1, HIP1R, SORL1, RABEPK, EEA1, ITSN2, APLP1, APP, PICALM, APOE, ITGAV, HIP1, ELMOD1, SCAMP1, PLD2, CLN3, DNM3, LRSAM1, ICAM5, ATP6V1H, CDK5, NPC1, LRP1, GAPVD1, JMJD6, AP2A1, TSC2, RIN1, SORT1, SH3GL2, EPN1, SH3GL1, DNM2	1104	220	13528	1.89374	0.778813	0.0434048	0.829884
Annotation Cluster 3	Enrichment Score: 4.343399620709646
Category	Term	Count	%	PValue	Genes	List Total	Pop Hits	Pop Total	Fold Enrichment	Bonferroni	Benjamini	FDR
GOTERM_BP_FAT	GO:0044265~cellular macromolecule catabolic process	97	6.85028	1.09051e-06	RNASEN, EIF2C1, BTRC, PPP2R5C, VPRBP, CNOT4, CUL2, USP54, APOE, BTBD1, ATG7, CUL9, FBXO25, CUL1, ANAPC1, RELA, ANAPC4, UBR4, SOCS7, MYH9, PSMA2, KDM2A, FBXO17, PSMA3, PIAS1, PABPC4, ASB13, RBX1, ARIH1, PSMB7, FBXW5, EIF3E, PSMB2, ZMPSTE24, FBXO7, HECTD1, SMG6, SMG7, HACE1, ATE1, UBE2E3, VCP, UBA1, FBXO32, LDLR, MLH1, UFC1, FANCL, USP19, PSMD1, PSMD3, DDA1, USP16, USP15, PSMD7, PSMD8, KIAA0427, PS…	1104	725	13528	1.63945	0.00358571	0.000897636	0.00198408
GOTERM_BP_FAT	GO:0009057~macromolecule catabolic process	101	7.13277	3.00235e-06	RNASEN, EIF2C1, BTRC, PPP2R5C, VPRBP, CNOT4, CUL2, USP54, APOE, BTBD1, ATG7, CUL9, FBXO25, CUL1, ANAPC1, RELA, ANAPC4, UBR4, SOCS7, MYH9, PSMA2, KDM2A, FBXO17, PSMA3, PIAS1, PABPC4, ASB13, RBX1, ARIH1, PSMB7, FBXW5, EIF3E, PSMB2, ZMPSTE24, FBXO7, HECTD1, SMG6, SMG7, HACE1, ATE1, UBE2E3, VCP, UBA1, FBXO32, LDLR, MLH1, UFC1, FANCL, USP19, PSMD1, PSMD3, DDA1, MAN2B1, USP16, USP15, PSMD7, PSMD8, KIAA…	1104	781	13528	1.58466	0.009841	0.00164693	0.00546238
GOTERM_BP_FAT	GO:0051603~proteolysis involved in cellular protein catabolic process	79	5.5791	2.24192e-05	BTRC, PPP2R5C, UFC1, VPRBP, CNOT4, FANCL, USP19, CUL2, USP54, BTBD1, ATG7, CUL9, PSMD1, FBXO25, PSMD3, DDA1, USP16, USP15, PSMD7, PSMD8, CUL1, PSMD9, ANAPC1, UFD1L, RELA, ANAPC4, UBR4, SOCS7, ERLIN2, HERC2, MYH9, UBE2B, PSMA2, KDM2A, PSEN1, FBXO17, UBE2K, PSMA3, PIAS1, PCYOX1, CHFR, USP24, ZER1, USP7, CUEDC2, USP30, APH1A, UBE3B, USP5, ASB13, C12ORF51, MYCBP2, RBX1, PSMF1, ARIH1, UEVLD, RNF123, P…	1104	600	13528	1.61339	0.0711885	0.00613523	0.040782
GOTERM_BP_FAT	GO:0044257~cellular protein catabolic process	79	5.5791	2.68001e-05	BTRC, PPP2R5C, UFC1, VPRBP, CNOT4, FANCL, USP19, CUL2, USP54, BTBD1, ATG7, CUL9, PSMD1, FBXO25, PSMD3, DDA1, USP16, USP15, PSMD7, PSMD8, CUL1, PSMD9, ANAPC1, UFD1L, RELA, ANAPC4, UBR4, SOCS7, ERLIN2, HERC2, MYH9, UBE2B, PSMA2, KDM2A, PSEN1, FBXO17, UBE2K, PSMA3, PIAS1, PCYOX1, CHFR, USP24, ZER1, USP7, CUEDC2, USP30, APH1A, UBE3B, USP5, ASB13, C12ORF51, MYCBP2, RBX1, PSMF1, ARIH1, UEVLD, RNF123, P…	1104	603	13528	1.60537	0.0844962	0.0058681	0.0487494
GOTERM_BP_FAT	GO:0030163~protein catabolic process	80	5.64972	4.49313e-05	BTRC, PPP2R5C, UFC1, VPRBP, CNOT4, FANCL, USP19, CUL2, USP54, BTBD1, ATG7, CUL9, PSMD1, FBXO25, PSMD3, DDA1, USP16, USP15, PSMD7, PSMD8, CUL1, PSMD9, ANAPC1, CLN3, UFD1L, RELA, ANAPC4, UBR4, SOCS7, ERLIN2, HERC2, MYH9, UBE2B, PSMA2, KDM2A, PSEN1, FBXO17, UBE2K, PSMA3, PIAS1, PCYOX1, CHFR, USP24, ZER1, USP7, CUEDC2, USP30, APH1A, UBE3B, USP5, ASB13, C12ORF51, MYCBP2, RBX1, PSMF1, ARIH1, UEVLD, RNF…	1104	622	13528	1.57603	0.137575	0.0081889	0.0817173
GOTERM_BP_FAT	GO:0043632~modification-dependent macromolecule catabolic process	74	5.22599	8.22531e-05	BTRC, PPP2R5C, UFC1, VPRBP, CNOT4, FANCL, USP19, CUL2, USP54, BTBD1, ATG7, CUL9, PSMD1, FBXO25, PSMD3, DDA1, USP16, USP15, PSMD7, PSMD8, CUL1, PSMD9, ANAPC1, UFD1L, ANAPC4, UBR4, SOCS7, ERLIN2, HERC2, UBE2B, PSMA2, KDM2A, FBXO17, UBE2K, PSMA3, PIAS1, PCYOX1, CHFR, USP24, ZER1, USP7, CUEDC2, USP30, UBE3B, USP5, ASB13, C12ORF51, MYCBP2, RBX1, PSMF1, ARIH1, UEVLD, PSMB7, RNF123, FBXW5, PSMB2, ZMPSTE…	1104	574	13528	1.57974	0.237348	0.0134563	0.149547
GOTERM_BP_FAT	GO:0019941~modification-dependent protein catabolic process	74	5.22599	8.22531e-05	BTRC, PPP2R5C, UFC1, VPRBP, CNOT4, FANCL, USP19, CUL2, USP54, BTBD1, ATG7, CUL9, PSMD1, FBXO25, PSMD3, DDA1, USP16, USP15, PSMD7, PSMD8, CUL1, PSMD9, ANAPC1, UFD1L, ANAPC4, UBR4, SOCS7, ERLIN2, HERC2, UBE2B, PSMA2, KDM2A, FBXO17, UBE2K, PSMA3, PIAS1, PCYOX1, CHFR, USP24, ZER1, USP7, CUEDC2, USP30, UBE3B, USP5, ASB13, C12ORF51, MYCBP2, RBX1, PSMF1, ARIH1, UEVLD, PSMB7, RNF123, FBXW5, PSMB2, ZMPSTE…	1104	574	13528	1.57974	0.237348	0.0134563	0.149547
GOTERM_BP_FAT	GO:0006511~ubiquitin-dependent protein catabolic process	38	2.68362	0.000143933	USP7, USP30, USP5, BTRC, PPP2R5C, USP19, ARIH1, PSMF1, CUL2, PSMB7, USP54, CUL9, PSMD1, PSMB2, PSMD3, USP34, USP16, PSMD7, USP15, CUL1, PSMD8, FBXO7, PSMD9, ANAPC1, UBE4A, UFD1L, ANAPC4, ERLIN2, UBE2B, ATE1, PSMA2, VCP, UBE2K, PSMA3, USP48, CHFR, TBL1X, USP24	1104	242	13528	1.92412	0.377586	0.0187873	0.261551
GOTERM_BP_FAT	GO:0006508~proteolysis	108	7.62712	0.00943065	CNDP1, MASP1, CNDP2, BTRC, PPP2R5C, VPRBP, CRADD, CNOT4, CUL2, USP54, HTRA1, BTBD1, ATG7, CUL9, FBXO25, LONRF1, LONRF2, CUL1, ANAPC1, RELA, ANAPC4, UBR4, SOCS7, NPEPPS, MYH9, PSMA2, KDM2A, FBXO17, DLD, PSMA3, PIAS1, ERMP1, PAMR1, ASB13, RBX1, ARIH1, PSMB7, ECE2, FBXW5, PSMB2, ZMPSTE24, FBXO7, HECTD1, WDR7, ADAM23, AGBL4, HACE1, ATE1, UBE2E3, CD55, VCP, UBA1, FBXO32, SOLH, METAP2, UFC1, FANCL, USP…	1104	1054	13528	1.25559	1	0.257147	15.8355
Annotation Cluster 4	Enrichment Score: 4.101083813183226
Category	Term	Count	%	PValue	Genes	List Total	Pop Hits	Pop Total	Fold Enrichment	Bonferroni	Benjamini	FDR
GOTERM_BP_FAT	GO:0006796~phosphate metabolic process	117	8.26271	1.49502e-05	ILKAP, PRPF4B, TBK1, ATP6AP1, TGFB3, PTPN23, DSTYK, C2ORF79, CTTNBP2, MAP3K5, APP, MAP3K4, PIK3CA, STK39, INSR, PTPRJ, IKBKAP, PTPRK, STK25, MADD, ROCK2, PTPRT, PTPRU, PPP1CB, SPAG9, MAP4K4, CDKL1, RIOK3, EIF2S1, DLD, PDGFRB, MAPK8, EIF2AK4, FGFR2, STK16, CCL2, MVD, PTPLAD1, ERBB2, HUS1, EPHB1, EPHB6, PTK2, CSF1R, GPD2, TRIO, SMAD2, ATR, PPA1, EPHA4, NTRK2, DYRK1A, TNK2, ABL1, MYLK, PRKAG1, CAD, …	1104	973	13528	1.47346	0.0480533	0.00491252	0.0271971
GOTERM_BP_FAT	GO:0006793~phosphorus metabolic process	117	8.26271	1.49502e-05	ILKAP, PRPF4B, TBK1, ATP6AP1, TGFB3, PTPN23, DSTYK, C2ORF79, CTTNBP2, MAP3K5, APP, MAP3K4, PIK3CA, STK39, INSR, PTPRJ, IKBKAP, PTPRK, STK25, MADD, ROCK2, PTPRT, PTPRU, PPP1CB, SPAG9, MAP4K4, CDKL1, RIOK3, EIF2S1, DLD, PDGFRB, MAPK8, EIF2AK4, FGFR2, STK16, CCL2, MVD, PTPLAD1, ERBB2, HUS1, EPHB1, EPHB6, PTK2, CSF1R, GPD2, TRIO, SMAD2, ATR, PPA1, EPHA4, NTRK2, DYRK1A, TNK2, ABL1, MYLK, PRKAG1, CAD, …	1104	973	13528	1.47346	0.0480533	0.00491252	0.0271971
GOTERM_BP_FAT	GO:0016310~phosphorylation	96	6.77966	0.00010592	PRPF4B, TBK1, PRKAG1, ATP6AP1, TGFB3, DSTYK, CAD, CAMKK2, PAK7, CTTNBP2, MAP3K5, APP, MAP3K4, NDUFS4, PIK3CA, ATP5L, STK39, PAK1, NDUFS3, SIK1, INSR, SIK2, AKT2, SRPK2, IKBKAP, SGK1, CAMK1G, NDUFB10, STK25, ROCK2, MADD, PIK3C2B, PI4KA, ATP6V1H, CDK9, NDUFC1, NDUFA10, ATP6V1D, CDK5, DAPK1, SPAG9, GRM4, MAP4K4, MAST1, CDKL1, PSEN1, RIOK3, RIPK1, EIF2S1, DLD, CD81, PDGFRB, MAPK8, EIF2AK4, UGP2, UQCR…	1104	800	13528	1.47043	0.294549	0.0157348	0.192537
GOTERM_BP_FAT	GO:0006468~protein amino acid phosphorylation	77	5.43785	0.00166493	PRPF4B, TBK1, PRKAG1, TGFB3, DSTYK, CAD, CAMKK2, PAK7, CTTNBP2, MAP3K5, APP, MAP3K4, PIK3CA, STK39, PAK1, SIK1, INSR, SIK2, AKT2, SRPK2, IKBKAP, SGK1, CAMK1G, STK25, ROCK2, MADD, CDK9, CDK5, DAPK1, SPAG9, GRM4, MAP4K4, MAST1, CDKL1, PSEN1, RIOK3, RIPK1, EIF2S1, CD81, PDGFRB, MAPK8, EIF2AK4, FGFR2, STK16, CCL2, PTPLAD1, CAMK2G, ERBB2, HUS1, EPHB1, EPHB6, PTK2, PTK2B, CAMK2D, DCLK2, CSF1R, AATK, TR…	1104	667	13528	1.41459	0.995867	0.105971	2.98624
Annotation Cluster 5	Enrichment Score: 2.858286467785635
Category	Term	Count	%	PValue	Genes	List Total	Pop Hits	Pop Total	Fold Enrichment	Bonferroni	Benjamini	FDR
GOTERM_BP_FAT	GO:0051056~regulation of small GTPase mediated signal transduction	44	3.10734	2.61628e-06	RABGAP1, ERBB2, RASGEF1A, ASAP1, ASAP3, ITSN2, ARFGEF1, SCRIB, IQGAP1, RGL1, ADAP1, TBC1D15, RASAL1, TBC1D17, GBF1, PTK2B, TIAM1, SOS1, TBC1D13, RAPGEF5, TBC1D7, RAPGEF4, ARHGEF10L, NET1, ARHGEF4, ARHGEF1, ARHGEF7, TBC1D10A, NF1, SIPA1L2, SIPA1L3, TRIO, ARHGEF12, TBC1D22B, TBC1D22A, NOTCH2, SGSM1, GAPVD1, RASGRF2, PSD, ACAP3, SGSM3, RASGRF1, TSC2	1104	252	13528	2.13952	0.00858101	0.00172212	0.00476001
GOTERM_BP_FAT	GO:0046578~regulation of Ras protein signal transduction	34	2.40113	0.000191971	RABGAP1, ERBB2, ASAP1, ASAP3, ITSN2, ARFGEF1, SCRIB, ADAP1, TBC1D15, TBC1D17, GBF1, TIAM1, PTK2B, SOS1, TBC1D13, TBC1D7, ARHGEF10L, NET1, ARHGEF4, ARHGEF1, TBC1D10A, ARHGEF7, NF1, TRIO, ARHGEF12, TBC1D22B, TBC1D22A, NOTCH2, SGSM1, RASGRF2, ACAP3, PSD, RASGRF1, SGSM3	1104	210	13528	1.98392	0.468692	0.0240302	0.3487
GOTERM_BP_FAT	GO:0043087~regulation of GTPase activity	23	1.62429	0.000358736	GDI1, GNAO1, RABGAP1, TBC1D10A, RAB3GAP1, NF1, ASAP1, ASAP3, TBC1D22B, TBC1D22A, SCRIB, ADAP1, TBC1D15, TBC1D17, SGSM1, ACAP3, RASGRF1, SGSM3, PTK2B, TSC2, TBC1D13, CHM, TBC1D7	1104	123	13528	2.29133	0.693301	0.0362602	0.650681
GOTERM_BP_FAT	GO:0032318~regulation of Ras GTPase activity	18	1.27119	0.00429278	RABGAP1, TBC1D10A, NF1, ASAP1, ASAP3, TBC1D22B, SCRIB, TBC1D22A, ADAP1, TBC1D15, TBC1D17, SGSM1, ACAP3, RASGRF1, SGSM3, PTK2B, TBC1D13, TBC1D7	1104	104	13528	2.12082	0.999999	0.16421	7.52869
GOTERM_BP_FAT	GO:0032313~regulation of Rab GTPase activity	10	0.706215	0.0124715	TBC1D15, TBC1D17, RABGAP1, SGSM1, TBC1D10A, SGSM3, TBC1D13, TBC1D7, TBC1D22B, TBC1D22A	1104	47	13528	2.60715	1	0.306383	20.4143
GOTERM_BP_FAT	GO:0032483~regulation of Rab protein signal transduction	10	0.706215	0.0124715	TBC1D15, TBC1D17, RABGAP1, SGSM1, TBC1D10A, SGSM3, TBC1D13, TBC1D7, TBC1D22B, TBC1D22A	1104	47	13528	2.60715	1	0.306383	20.4143
GOTERM_BP_FAT	GO:0051336~regulation of hydrolase activity	36	2.54237	0.0816063	RABGAP1, RAB3GAP1, ASAP1, ASAP3, SCRIB, ADAP1, SLC11A2, EDNRB, TBC1D15, TBC1D17, PTK2B, TBC1D13, TGM2, CHM, TBC1D7, DNAJA3, HIP1, GDI1, GNAO1, SSBP1, TBC1D10A, NF1, SMAD3, RPS3P3, HOMER1, STAT1, TBC1D22B, TBC1D22A, SGSM1, VCP, ACAP3, RASGRF1, SGSM3, TSC2, CSTB, SORT1	1104	337	13528	1.30899	1	0.680149	78.7509
Annotation Cluster 6	Enrichment Score: 2.6456792443565393
Category	Term	Count	%	PValue	Genes	List Total	Pop Hits	Pop Total	Fold Enrichment	Bonferroni	Benjamini	FDR
GOTERM_BP_FAT	GO:0043623~cellular protein complex assembly	29	2.04802	0.000112027	XPO1, NUP98, XPO6, FKBP4, TUBB2C, MLH1, CTTNBP2, PTK2, NDUFS4, PICALM, PTK2B, TUBE1, TUBA1B, HIP1, SRP54, TCP1, ATPAF2, SMAD3, SMAD2, IPO9, C20ORF7, CDK5, GAS7, FLNA, PSMG1, IPO7, MAPK8IP2, TOMM22, CACNA1A	1104	162	13528	2.19355	0.3086	0.0152589	0.203627
GOTERM_BP_FAT	GO:0070271~protein complex biogenesis	65	4.5904	0.000248639	XPO1, XPO6, PRKAG1, TUBB2C, MLH1, SKAP2, CTTNBP2, RANBP9, PICALM, NDUFS4, CAT, USP16, TUBA1B, INSR, IKBKAP, ATPAF2, ALDH5A1, MED12, GTF2H4, PFKP, CDK9, DPAGT1, IPO9, STXBP3, PFKM, CDK5, FLNA, STOM, SPAG9, IPO7, SBF2, TOMM22, STK16, REPS2, NUP98, APC2, FKBP4, TAF9B, RIMS1, POLR2C, POLR2B, MTMR2, PTK2, LPXN, PTK2B, TGM2, TUBE1, OLFM1, APBA1, HIP1, ERCC2, TAF4, SRP54, TCP1, SMAD3, C20ORF7, SMAD2, GA…	1104	505	13528	1.5772	0.55918	0.0298821	0.451412
GOTERM_BP_FAT	GO:0006461~protein complex assembly	65	4.5904	0.000248639	XPO1, XPO6, PRKAG1, TUBB2C, MLH1, SKAP2, CTTNBP2, RANBP9, PICALM, NDUFS4, CAT, USP16, TUBA1B, INSR, IKBKAP, ATPAF2, ALDH5A1, MED12, GTF2H4, PFKP, CDK9, DPAGT1, IPO9, STXBP3, PFKM, CDK5, FLNA, STOM, SPAG9, IPO7, SBF2, TOMM22, STK16, REPS2, NUP98, APC2, FKBP4, TAF9B, RIMS1, POLR2C, POLR2B, MTMR2, PTK2, LPXN, PTK2B, TGM2, TUBE1, OLFM1, APBA1, HIP1, ERCC2, TAF4, SRP54, TCP1, SMAD3, C20ORF7, SMAD2, GA…	1104	505	13528	1.5772	0.55918	0.0298821	0.451412
GOTERM_BP_FAT	GO:0065003~macromolecular complex assembly	74	5.22599	0.00527844	XPO1, XPO6, PRKAG1, TUBB2C, MLH1, SKAP2, CTTNBP2, RANBP9, PICALM, NDUFS4, APOE, CAT, USP16, INSR, TUBA1B, SRPK2, IKBKAP, ATPAF2, ALDH5A1, MED12, GTF2H4, PFKP, CDK9, DPAGT1, IPO9, STXBP3, PFKM, MBNL1, CDK5, FLNA, STOM, SPAG9, PIH1D1, IPO7, SBF2, SNRNP200, TOMM22, SNRPC, SNRPF, STK16, REPS2, NUP98, APC2, FKBP4, TAF9B, POLR2C, RIMS1, POLR2B, MTMR2, PTK2, LPXN, TSPYL2, PTK2B, TGM2, TUBE1, OLFM1, APBA…	1104	665	13528	1.36356	1	0.187418	9.18006
GOTERM_BP_FAT	GO:0043933~macromolecular complex subunit organization	77	5.43785	0.00815777	XPO1, XPO6, PRKAG1, TUBB2C, MLH1, SKAP2, CTTNBP2, RANBP9, PICALM, NDUFS4, SEH1L, APOE, CAT, USP16, INSR, TUBA1B, SRPK2, IKBKAP, ATPAF2, ALDH5A1, MED12, GTF2H4, PFKP, CDK9, DPAGT1, IPO9, STXBP3, ARID1A, PFKM, MBNL1, CDK5, FLNA, STOM, SPAG9, PIH1D1, IPO7, SBF2, SNRNP200, TOMM22, SNRPC, SNRPF, STK16, REPS2, NUP98, APC2, FKBP4, TAF9B, POLR2C, RIMS1, POLR2B, MTMR2, PTK2, LPXN, TSPYL2, PTK2B, TGM2, TUB…	1104	710	13528	1.32891	1	0.240675	13.8459
GOTERM_BP_FAT	GO:0034622~cellular macromolecular complex assembly	37	2.61299	0.0275483	XPO1, NUP98, XPO6, FKBP4, TUBB2C, MLH1, CTTNBP2, PTK2, TSPYL2, NDUFS4, PICALM, PTK2B, TUBE1, TUBA1B, HIP1, SRPK2, SRP54, TCP1, ATPAF2, SMAD3, C20ORF7, SMAD2, IPO9, MBNL1, CDK5, GAS7, FLNA, ATXN2, PSMG1, PIH1D1, IPO7, SNRNP200, MAPK8IP2, TOMM22, SNRPC, SNRPF, CACNA1A	1104	318	13528	1.42574	1	0.447698	39.8454
GOTERM_BP_FAT	GO:0034621~cellular macromolecular complex subunit organization	40	2.82486	0.0367803	XPO1, NUP98, XPO6, FKBP4, TUBB2C, MLH1, CTTNBP2, PTK2, TSPYL2, NDUFS4, PICALM, SEH1L, PTK2B, TUBE1, TUBA1B, HIP1, SRPK2, SRP54, TCP1, ATPAF2, SMAD3, C20ORF7, SMAD2, ARID1A, IPO9, MBNL1, CDK5, GAS7, FLNA, ATXN2, PSMG1, PIH1D1, IPO7, SNRNP200, MAPK8IP2, SUPT16H, TOMM22, SNRPC, SNRPF, CACNA1A	1104	357	13528	1.37295	1	0.494385	49.4296
Annotation Cluster 7	Enrichment Score: 2.539912531685834
Category	Term	Count	%	PValue	Genes	List Total	Pop Hits	Pop Total	Fold Enrichment	Bonferroni	Benjamini	FDR
GOTERM_BP_FAT	GO:0006487~protein amino acid N-linked glycosylation	12	0.847458	0.000626802	MGAT4B, STT3B, TUSC3, LIPA, STT3A, DAD1, DPAGT1, ST8SIA3, CD4, MGAT5, ALG8, DDOST	1104	44	13528	3.3419	0.873224	0.0573022	1.13429
GOTERM_BP_FAT	GO:0018196~peptidyl-asparagine modification	5	0.353107	0.00618822	STT3B, TUSC3, STT3A, DAD1, DDOST	1104	10	13528	6.12681	1	0.205264	10.6795
GOTERM_BP_FAT	GO:0018279~protein amino acid N-linked glycosylation via asparagine	5	0.353107	0.00618822	STT3B, TUSC3, STT3A, DAD1, DDOST	1104	10	13528	6.12681	1	0.205264	10.6795
Annotation Cluster 8	Enrichment Score: 2.5111643555650613
Category	Term	Count	%	PValue	Genes	List Total	Pop Hits	Pop Total	Fold Enrichment	Bonferroni	Benjamini	FDR
GOTERM_BP_FAT	GO:0007411~axon guidance	21	1.48305	0.000360931	NRP1, ERBB2, NRXN1, SLIT1, TBR1, CDK5, EPHB1, SLIT3, MYCBP2, SEMA6A, EPHA4, APP, UNC5B, SEMA4F, LHX2, TNR, MAPK8IP3, SEMA3B, ROBO2, SPON2, MYH10	1104	107	13528	2.40492	0.695511	0.0353924	0.65465
GOTERM_BP_FAT	GO:0000904~cell morphogenesis involved in differentiation	36	2.54237	0.00072489	S100A4, S100A6, NRP1, ERBB2, DSCAML1, EPHB1, MYCBP2, APP, PTK2, UNC5B, TNR, LHX2, ROBO2, SEMA3B, SPON2, CDH23, FN1, PTPRZ1, TRIM28, NR4A2, CELSR2, NRXN1, MYH9, CDK5, TBR1, SLIT1, SLIT3, CTNNA2, EPHA4, SEMA6A, NOTCH1, SEMA4F, CNTN2, MAPK8IP3, CACNA1A, MYH10	1104	244	13528	1.80791	0.908247	0.0609244	1.31069
GOTERM_BP_FAT	GO:0048667~cell morphogenesis involved in neuron differentiation	32	2.25989	0.000813278	S100A6, NRP1, ERBB2, DSCAML1, EPHB1, MYCBP2, APP, PTK2, UNC5B, TNR, LHX2, ROBO2, SEMA3B, SPON2, CDH23, PTPRZ1, NR4A2, CELSR2, NRXN1, CDK5, TBR1, SLIT1, SLIT3, CTNNA2, SEMA6A, EPHA4, NOTCH1, SEMA4F, CNTN2, MAPK8IP3, CACNA1A, MYH10	1104	209	13528	1.87615	0.931439	0.0664107	1.46939
GOTERM_BP_FAT	GO:0048812~neuron projection morphogenesis	32	2.25989	0.00111769	S100A6, NRP1, ERBB2, DSCAML1, EPHB1, MYCBP2, APP, PTK2, UNC5B, TNR, LHX2, ROBO2, SEMA3B, SPON2, PTPRZ1, NR4A2, CELSR2, NRXN1, CDK5, GAS7, TBR1, SLIT1, SLIT3, CTNNA2, SEMA6A, EPHA4, NOTCH1, SEMA4F, CNTN2, MAPK8IP3, CACNA1A, MYH10	1104	213	13528	1.84092	0.974871	0.0859294	2.01413
GOTERM_BP_FAT	GO:0030030~cell projection organization	48	3.38983	0.00133796	MTSS1, S100A6, NRP1, ERBB2, DYNC2LI1, DSCAML1, EPHB1, MYCBP2, VCL, PTK2, APP, UNC5B, PTK2B, IFT20, TNR, LHX2, ROBO2, SEMA3B, SPON2, SS18L1, CDH23, THBS4, DNM3, GNAO1, CCDC88A, PTPRZ1, NR4A2, CELSR2, NRXN1, MYH9, CDK5, TBR1, UBE2B, SLIT1, GAS7, GPR98, CTNNA2, SLIT3, EPHA4, SEMA6A, NOTCH1, SEMA4F, RASGRF1, TSC2, CNTN2, MAPK8IP3, CACNA1A, MYH10	1104	368	13528	1.5983	0.987847	0.0953723	2.40651
GOTERM_BP_FAT	GO:0031175~neuron projection development	36	2.54237	0.00170551	S100A6, NRP1, ERBB2, DSCAML1, EPHB1, MYCBP2, APP, PTK2, UNC5B, PTK2B, TNR, LHX2, ROBO2, SEMA3B, SPON2, SS18L1, GNAO1, PTPRZ1, NR4A2, CELSR2, NRXN1, CDK5, GAS7, TBR1, SLIT1, SLIT3, CTNNA2, EPHA4, SEMA6A, NOTCH1, SEMA4F, RASGRF1, CNTN2, MAPK8IP3, CACNA1A, MYH10	1104	256	13528	1.72317	0.996385	0.10439	3.05796
GOTERM_BP_FAT	GO:0007409~axonogenesis	29	2.04802	0.00198864	S100A6, NRP1, ERBB2, DSCAML1, EPHB1, MYCBP2, APP, PTK2, UNC5B, LHX2, TNR, ROBO2, SEMA3B, SPON2, PTPRZ1, NR4A2, NRXN1, CDK5, TBR1, SLIT1, SLIT3, CTNNA2, SEMA6A, EPHA4, NOTCH1, SEMA4F, CNTN2, MAPK8IP3, MYH10	1104	193	13528	1.84122	0.99858	0.110496	3.55697
GOTERM_BP_FAT	GO:0032990~cell part morphogenesis	35	2.47175	0.00317836	S100A6, NRP1, ERBB2, DYNC2LI1, DSCAML1, EPHB1, MYCBP2, APP, PTK2, UNC5B, TNR, LHX2, ROBO2, SEMA3B, SPON2, OPA1, SSBP1, PTPRZ1, NR4A2, CELSR2, NRXN1, CDK5, GAS7, TBR1, SLIT1, SLIT3, CTNNA2, SEMA6A, EPHA4, NOTCH1, SEMA4F, CNTN2, MAPK8IP3, CACNA1A, MYH10	1104	256	13528	1.6753	0.999972	0.142907	5.62744
GOTERM_BP_FAT	GO:0000902~cell morphogenesis	45	3.17797	0.00355715	S100A4, S100A6, SHROOM3, NRP1, ERBB2, DYNC2LI1, DSCAML1, SCRIB, EPHB1, MYCBP2, APP, PTK2, ANK1, UNC5B, TNR, LHX2, ROBO2, CLASP1, SEMA3B, SPON2, FN1, CDH23, LIPA, PTPRZ1, TRIM28, NR4A2, CELSR2, NRXN1, MYH9, CDK5, GAS7, TBR1, SLIT1, CTNNA2, SLIT3, EPHA4, SEMA6A, SS18, NOTCH1, SEMA4F, CNTN2, MAPK8IP3, CACNA1A, ADD1, MYH10	1104	356	13528	1.54891	0.999992	0.152382	6.27777
GOTERM_BP_FAT	GO:0032989~cellular component morphogenesis	49	3.46045	0.00369063	S100A4, S100A6, NRP1, DYNC2LI1, APP, ANK1, UNC5B, ROBO2, SEMA3B, SPON2, CDH23, OPA1, SSBP1, NRXN1, MYH9, CDK5, UBE2B, TBR1, SLIT1, CTNNA2, SLIT3, SS18, SEMA4F, CNTN2, ADD1, SHROOM3, ERBB2, DSCAML1, EPHB1, SCRIB, MYCBP2, PTK2, LHX2, TNR, CLASP1, ERCC2, FN1, LIPA, PTPRZ1, TRIM28, NR4A2, CELSR2, GAS7, EPHA4, SEMA6A, NOTCH1, MAPK8IP3, CACNA1A, MYH10	1104	397	13528	1.51241	0.999995	0.153666	6.50594
GOTERM_BP_FAT	GO:0048858~cell projection morphogenesis	33	2.33051	0.0053153	S100A6, NRP1, ERBB2, DYNC2LI1, DSCAML1, EPHB1, MYCBP2, APP, PTK2, UNC5B, TNR, LHX2, ROBO2, SEMA3B, SPON2, PTPRZ1, NR4A2, CELSR2, NRXN1, CDK5, GAS7, TBR1, SLIT1, SLIT3, CTNNA2, SEMA6A, EPHA4, NOTCH1, SEMA4F, CNTN2, MAPK8IP3, CACNA1A, MYH10	1104	245	13528	1.65049	1	0.186601	9.24127
GOTERM_BP_FAT	GO:0048666~neuron development	42	2.9661	0.00692787	S100A6, NRP1, ERBB2, DSCAML1, EPHB1, MYCBP2, APP, PTK2, UNC5B, PTK2B, TNR, LHX2, ROBO2, SEMA3B, OLFM3, SPON2, SS18L1, CDH23, GNAO1, PTPRZ1, NTN4, NR4A2, CELSR2, NRXN1, CDK5, GAS7, TBR1, SLIT1, GPR98, CTNNA2, SLIT3, EPHA4, SEMA6A, NOTCH1, PSEN1, SEMA4F, RASGRF1, NTRK2, CNTN2, MAPK8IP3, CACNA1A, MYH10	1104	339	13528	1.51815	1	0.22248	11.8813
GOTERM_BP_FAT	GO:0030182~neuron differentiation	47	3.31921	0.0445581	S100A6, NRP1, ERBB2, JAG2, DSCAML1, NAPA, JAG1, EPHB1, MYCBP2, APP, PTK2, UNC5B, PTK2B, TNR, LHX2, ROBO2, SEMA3B, OLFM3, SPON2, SS18L1, CDH23, C17ORF28, GNAO1, PTPRZ1, NTN4, NR4A2, CELSR2, NRXN1, CDK5, GAS7, TBR1, SLIT1, GPR98, CTNNA2, SLIT3, EPHA4, SEMA6A, NOTCH1, PSD, PSEN1, SEMA4F, RASGRF1, NTRK2, CNTN2, MAPK8IP3, CACNA1A, MYH10	1104	438	13528	1.31489	1	0.536974	56.3652
GOTERM_BP_FAT	GO:0006928~cell motion	48	3.38983	0.0944337	MTSS1, CCL2, NRP1, DNAH17, ERBB2, TUBB2C, SCRIB, EPHB1, TPM4, MYCBP2, VCL, CTTNBP2, EDNRB, APP, PTK2, UNC5B, PTK2B, TNR, LHX2, PRSS3, ROBO2, SEMA3B, SPON2, FN1, THBS4, PTPRK, SATB2, CCDC88A, PLXNB1, ARHGEF7, NR4A2, NRXN1, MYH9, CERCAM, CDK5, TBR1, SLIT1, CTNNA2, SLIT3, EPHA4, SEMA6A, PSEN1, SEMA4F, CNTN2, MAPK8IP3, PDGFRB, MAPK8, MYH10	1104	475	13528	1.23826	1	0.714041	83.5487
Annotation Cluster 9	Enrichment Score: 2.3688849849071936
Category	Term	Count	%	PValue	Genes	List Total	Pop Hits	Pop Total	Fold Enrichment	Bonferroni	Benjamini	FDR
GOTERM_BP_FAT	GO:0032268~regulation of cellular protein metabolic process	68	4.80226	5.66951e-06	HSP90AB1, A2M, EIF2C1, CPEB2, MASP1, BTRC, IMPACT, TGFB3, EDNRB, MAP3K5, APP, NDUFS4, APOE, ATG7, PSMD1, PSMD3, RAPGEF4, EIF1, PUM2, PAK1, PSMD7, INSR, PSMD8, KIAA0427, CUL1, PSMD9, ANAPC1, IBTK, CLN3, CCDC88A, ANAPC4, CDK5, EIF4G1, PSMA2, EIF4G3, PSEN1, RIPK1, EIF2S1, PSMA3, CD81, PDGFRB, PIAS1, EIF2AK4, ZER1, GCLC, PTPLAD1, NFKBIA, GCN1L1, APLP1, PSMF1, PSMB7, TNRC6C, PTK2B, EIF3E, ITGAV, PSMB2…	1104	474	13528	1.7579	0.0185021	0.00266436	0.0103147
GOTERM_BP_FAT	GO:0051248~negative regulation of protein metabolic process	32	2.25989	0.000110249	HSP90AB1, A2M, EIF2C1, GCLC, MASP1, PSMF1, PSMB7, ITGAV, EIF3E, PSMB2, PSMD1, PSMD3, TNRC6A, INSR, PSMD7, PSMD8, PSMD9, HHATL, IBTK, ANAPC1, CLN3, PAIP2, RELA, ANAPC4, GRIN2A, CDK5, EIF2B1, FLNA, PSMA2, PSEN1, PSMA3, EIF2AK4	1104	187	13528	2.09688	0.30454	0.0156665	0.2004
GOTERM_BP_FAT	GO:0006511~ubiquitin-dependent protein catabolic process	38	2.68362	0.000143933	USP7, USP30, USP5, BTRC, PPP2R5C, USP19, ARIH1, PSMF1, CUL2, PSMB7, USP54, CUL9, PSMD1, PSMB2, PSMD3, USP34, USP16, PSMD7, USP15, CUL1, PSMD8, FBXO7, PSMD9, ANAPC1, UBE4A, UFD1L, ANAPC4, ERLIN2, UBE2B, ATE1, PSMA2, VCP, UBE2K, PSMA3, USP48, CHFR, TBL1X, USP24	1104	242	13528	1.92412	0.377586	0.0187873	0.261551
GOTERM_BP_FAT	GO:0032269~negative regulation of cellular protein metabolic process	29	2.04802	0.000671247	HSP90AB1, A2M, EIF2C1, GCLC, MASP1, PSMF1, PSMB7, ITGAV, EIF3E, PSMB2, PSMD1, PSMD3, TNRC6A, INSR, PSMD7, PSMD8, HHATL, PSMD9, IBTK, ANAPC1, CLN3, PAIP2, ANAPC4, CDK5, EIF2B1, PSMA2, PSEN1, PSMA3, EIF2AK4	1104	180	13528	1.97419	0.8905	0.0580275	1.21426
GOTERM_BP_FAT	GO:0051351~positive regulation of ligase activity	15	1.05932	0.00205331	ANAPC1, BTRC, ANAPC4, GCLM, PSMA2, PSMF1, PSMB7, PSMB2, PSMA3, PSMD1, PSMD3, PSMD7, PSMD8, CUL1, PSMD9	1104	73	13528	2.51787	0.998853	0.110178	3.6706
GOTERM_BP_FAT	GO:0051340~regulation of ligase activity	16	1.12994	0.00207867	ANAPC1, BTRC, ANAPC4, GCLM, PSMA2, PSMF1, PSMB7, PSMB2, PSMA3, PSMD1, PSMD3, PSMD7, ZER1, PSMD8, CUL1, PSMD9	1104	81	13528	2.42047	0.998945	0.10968	3.71513
GOTERM_BP_FAT	GO:0031396~regulation of protein ubiquitination	18	1.27119	0.002826	ANAPC1, GCLC, BTRC, ANAPC4, CDK5, PSMA2, PSMF1, PSMB7, PSMB2, PSMA3, PSMD1, PSMD3, PSMD7, DNAJA3, CUL1, ZER1, PSMD8, PSMD9	1104	100	13528	2.20565	0.999911	0.137542	5.01865
GOTERM_BP_FAT	GO:0051437~positive regulation of ubiquitin-protein ligase activity during mitotic cell cycle	14	0.988701	0.00301076	ANAPC1, BTRC, ANAPC4, PSMA2, PSMF1, PSMB7, PSMB2, PSMA3, PSMD1, PSMD3, PSMD7, PSMD8, CUL1, PSMD9	1104	68	13528	2.5228	0.999951	0.139714	5.33832
GOTERM_BP_FAT	GO:0031399~regulation of protein modification process	39	2.75424	0.00322557	GCLC, PTPLAD1, BTRC, TGFB3, PSMF1, EDNRB, MAP3K5, PSMB7, NDUFS4, PTK2B, ATG7, PSMD1, PSMB2, PSMD3, CD4, RAPGEF4, PAK1, PSMD7, INSR, PSMD8, CUL1, DNAJA3, PSMD9, HHATL, ANAPC1, IBTK, CCDC88A, ANAPC4, CDK5, PSMA2, PSEN1, RIPK1, PSMA3, CD81, PDGFRB, MAPK8IP3, TNK2, PIAS1, ZER1	1104	295	13528	1.61997	0.999976	0.142929	5.70872
GOTERM_BP_FAT	GO:0051438~regulation of ubiquitin-protein ligase activity	15	1.05932	0.00388604	ANAPC1, BTRC, ANAPC4, PSMA2, PSMF1, PSMB7, PSMB2, PSMA3, PSMD1, PSMD3, PSMD7, ZER1, PSMD8, CUL1, PSMD9	1104	78	13528	2.35647	0.999997	0.15913	6.83901
GOTERM_BP_FAT	GO:0051443~positive regulation of ubiquitin-protein ligase activity	14	0.988701	0.0039159	ANAPC1, BTRC, ANAPC4, PSMA2, PSMF1, PSMB7, PSMB2, PSMA3, PSMD1, PSMD3, PSMD7, PSMD8, CUL1, PSMD9	1104	70	13528	2.45072	0.999998	0.156383	6.8898
GOTERM_BP_FAT	GO:0051439~regulation of ubiquitin-protein ligase activity during mitotic cell cycle	14	0.988701	0.00444459	ANAPC1, BTRC, ANAPC4, PSMA2, PSMF1, PSMB7, PSMB2, PSMA3, PSMD1, PSMD3, PSMD7, PSMD8, CUL1, PSMD9	1104	71	13528	2.41621	1	0.167576	7.78487
GOTERM_BP_FAT	GO:0031397~negative regulation of protein ubiquitination	14	0.988701	0.0063832	ANAPC1, GCLC, ANAPC4, CDK5, PSMA2, PSMF1, PSMB7, PSMB2, PSMA3, PSMD1, PSMD3, PSMD7, PSMD8, PSMD9	1104	74	13528	2.31825	1	0.208934	10.9978
GOTERM_BP_FAT	GO:0031398~positive regulation of protein ubiquitination	15	1.05932	0.00764368	ANAPC1, BTRC, ANAPC4, PSMA2, PSMF1, PSMB7, PSMB2, PSMA3, PSMD1, PSMD3, PSMD7, DNAJA3, PSMD8, CUL1, PSMD9	1104	84	13528	2.18815	1	0.231474	13.0298
GOTERM_BP_FAT	GO:0043161~proteasomal ubiquitin-dependent protein catabolic process	17	1.20056	0.00820754	ANAPC1, ANAPC4, PPP2R5C, ERLIN2, PSMA2, USP19, PSMF1, PSMB7, VCP, PSMB2, PSMD1, PSMA3, PSMD3, TBL1X, PSMD7, PSMD8, PSMD9	1104	102	13528	2.04227	1	0.239831	13.9245
GOTERM_BP_FAT	GO:0010498~proteasomal protein catabolic process	17	1.20056	0.00820754	ANAPC1, ANAPC4, PPP2R5C, ERLIN2, PSMA2, USP19, PSMF1, PSMB7, VCP, PSMB2, PSMD1, PSMA3, PSMD3, TBL1X, PSMD7, PSMD8, PSMD9	1104	102	13528	2.04227	1	0.239831	13.9245
GOTERM_BP_FAT	GO:0044092~negative regulation of molecular function	40	2.82486	0.0143206	ADCY2, ADCY5, GABBR1, NFKBIA, PSMF1, EDNRB, PSMB7, HRH3, APOE, ARG2, PSMD1, PSMB2, PKD2, PSMD3, MLLT1, CAT, CDK5RAP1, PSMD7, INSR, DNAJA3, PSMD8, PSMD9, ANAPC1, DEPDC6, CLN3, NF1, ANAPC4, PKIG, RB1, RPS3P3, FLNA, LRPAP1, PSMA2, GRM4, PSEN1, PSMA3, TSC2, CSTB, SORT1, COMMD7	1104	334	13528	1.4675	1	0.324749	23.0825
GOTERM_BP_FAT	GO:0031145~anaphase-promoting complex-dependent proteasomal ubiquitin-dependent protein catabolic process	12	0.847458	0.015232	PSMA2, ANAPC1, PSMF1, PSMB7, PSMA3, PSMB2, ANAPC4, PSMD1, PSMD3, PSMD7, PSMD8, PSMD9	1104	65	13528	2.26221	1	0.337053	24.3662
GOTERM_BP_FAT	GO:0051436~negative regulation of ubiquitin-protein ligase activity during mitotic cell cycle	12	0.847458	0.015232	PSMA2, ANAPC1, PSMF1, PSMB7, PSMA3, PSMB2, ANAPC4, PSMD1, PSMD3, PSMD7, PSMD8, PSMD9	1104	65	13528	2.26221	1	0.337053	24.3662
GOTERM_BP_FAT	GO:0031400~negative regulation of protein modification process	18	1.27119	0.0161764	IBTK, ANAPC1, GCLC, ANAPC4, CDK5, PSMA2, PSMF1, PSMB7, PSEN1, PSMB2, PSMA3, PSMD1, PSMD3, INSR, PSMD7, PSMD8, HHATL, PSMD9	1104	119	13528	1.85349	1	0.349339	25.6751
GOTERM_BP_FAT	GO:0051444~negative regulation of ubiquitin-protein ligase activity	12	0.847458	0.0188632	PSMA2, ANAPC1, PSMF1, PSMB7, PSMA3, PSMB2, ANAPC4, PSMD1, PSMD3, PSMD7, PSMD8, PSMD9	1104	67	13528	2.19468	1	0.376026	29.2827
GOTERM_BP_FAT	GO:0051352~negative regulation of ligase activity	12	0.847458	0.0188632	PSMA2, ANAPC1, PSMF1, PSMB7, PSMA3, PSMB2, ANAPC4, PSMD1, PSMD3, PSMD7, PSMD8, PSMD9	1104	67	13528	2.19468	1	0.376026	29.2827
GOTERM_BP_FAT	GO:0051247~positive regulation of protein metabolic process	30	2.11864	0.0243841	GCLC, WFS1, BTRC, TGFB3, NFKBIA, PSMF1, EDNRB, PSMB7, APOE, PTK2B, ATG7, PSMB2, PSMD1, PSMD3, CD4, PSMD7, INSR, CUL1, DNAJA3, PSMD8, PSMD9, ANAPC1, ANAPC4, PSMA2, PSEN1, SGSM3, CD81, PSMA3, TNK2, PIAS1	1104	243	13528	1.51279	1	0.41639	36.1829
GOTERM_BP_FAT	GO:0043086~negative regulation of catalytic activity	33	2.33051	0.0283515	ADCY2, ADCY5, GABBR1, PSMF1, EDNRB, PSMB7, HRH3, APOE, ARG2, PSMD1, PSMB2, PSMD3, MLLT1, CDK5RAP1, PSMD7, DNAJA3, PSMD8, PSMD9, ANAPC1, DEPDC6, CLN3, NF1, PKIG, ANAPC4, RB1, FLNA, PSMA2, GRM4, PSEN1, TSC2, PSMA3, CSTB, SORT1	1104	277	13528	1.45982	1	0.450978	40.743
GOTERM_BP_FAT	GO:0031401~positive regulation of protein modification process	24	1.69492	0.0308103	ANAPC1, BTRC, ANAPC4, TGFB3, PSMA2, PSMF1, EDNRB, PSMB7, PSEN1, ATG7, PSMB2, PSMD1, CD81, PSMA3, PSMD3, CD4, PIAS1, TNK2, INSR, PSMD7, DNAJA3, CUL1, PSMD8, PSMD9	1104	187	13528	1.57266	1	0.470769	43.4127
GOTERM_BP_FAT	GO:0032270~positive regulation of cellular protein metabolic process	28	1.9774	0.0400334	GCLC, BTRC, TGFB3, NFKBIA, EDNRB, PSMF1, PSMB7, APOE, PTK2B, ATG7, PSMB2, PSMD1, PSMD3, CD4, PSMD7, INSR, CUL1, DNAJA3, PSMD8, PSMD9, ANAPC1, ANAPC4, PSMA2, PSEN1, CD81, PSMA3, TNK2, PIAS1	1104	233	13528	1.47254	1	0.520697	52.4485
Annotation Cluster 10	Enrichment Score: 2.347886112773048
Category	Term	Count	%	PValue	Genes	List Total	Pop Hits	Pop Total	Fold Enrichment	Bonferroni	Benjamini	FDR
GOTERM_BP_FAT	GO:0016071~mRNA metabolic process	51	3.60169	0.000269158	SCAF1, PRPF4B, EIF2C1, MLH1, HNRPLL, APP, TARDBP, DNAJC8, LSM2, PTBP2, KIAA0427, SRPK2, EFTUD2, MTPAP, MBNL1, SFRS3, AQR, PAPD4, SNRNP200, RBM39, SNRPC, SNRPF, SSU72, SNRPB2, POLR2C, POLR2B, APLP1, EXOSC10, SFRS16, DDX46, FRG1, PRPF8, EIF3E, SNRNP70, HNRNPC, C19ORF61, PPWD1, NOVA1, SFRS12, DHX8, DHX9, UPF1, SMG6, SMG7, YTHDC1, PPIH, PAPOLA, JMJD6, RNPC3, HNRNPH1, CSTF1	1104	370	13528	1.68901	0.587998	0.0311726	0.48858
GOTERM_BP_FAT	GO:0006396~RNA processing	66	4.66102	0.00128317	RNASEN, SCAF1, PRPF4B, RPL14, GAR1, TRMT2B, MLH1, TRMT1, HNRPLL, APP, TARDBP, DNAJC8, RPP30, LSM2, PTBP2, CDK5RAP1, SRPK2, MRPL1, KRR1, EFTUD2, MTPAP, EXOSC3, RRP9, MBNL1, SFRS3, AQR, PAPD4, SNRNP200, SNRPC, RBM39, SNRPF, SSU72, ELAC2, PABPC4, SNRPB2, IVNS1ABP, POLR2C, POLR2B, APLP1, EXOSC10, ADAT1, DDX46, SFRS16, AGGF1, FRG1, PRPF8, NPM3, SNRNP70, HNRNPC, NOVA1, PPWD1, SFRS12, DHX8, DHX9, SMAD3,…	1104	547	13528	1.4785	0.98544	0.093677	2.30904
GOTERM_BP_FAT	GO:0006397~mRNA processing	43	3.03672	0.00149059	SCAF1, PRPF4B, SNRPB2, MLH1, POLR2C, HNRPLL, POLR2B, APLP1, APP, SFRS16, DDX46, FRG1, TARDBP, PRPF8, DNAJC8, SNRNP70, PTBP2, LSM2, HNRNPC, NOVA1, PPWD1, SFRS12, DHX8, SRPK2, DHX9, EFTUD2, MTPAP, YTHDC1, MBNL1, SFRS3, PPIH, PAPOLA, AQR, PAPD4, JMJD6, SNRNP200, SNRPC, RBM39, RNPC3, HNRNPH1, SNRPF, CSTF1, SSU72	1104	321	13528	1.64145	0.992655	0.101312	2.67754
GOTERM_BP_FAT	GO:0008380~RNA splicing	37	2.61299	0.00527483	SCAF1, PRPF4B, SNRPB2, IVNS1ABP, POLR2C, POLR2B, SFRS16, DDX46, FRG1, TARDBP, PRPF8, DNAJC8, SNRNP70, PTBP2, LSM2, HNRNPC, NOVA1, PPWD1, SFRS12, DHX8, SRPK2, DHX9, EFTUD2, YTHDC1, MBNL1, SFRS3, PPIH, PAPOLA, AQR, JMJD6, SNRNP200, SNRPC, RBM39, RNPC3, HNRNPH1, SNRPF, CSTF1	1104	284	13528	1.59642	1	0.189331	9.17406
GOTERM_BP_FAT	GO:0000377~RNA splicing, via transesterification reactions with bulged adenosine as nucleophile	21	1.48305	0.0238221	SRPK2, DHX9, EFTUD2, SNRPB2, YTHDC1, MBNL1, POLR2C, POLR2B, SFRS3, PAPOLA, PRPF8, DNAJC8, SNRNP200, SNRPC, HNRNPC, LSM2, SNRNP70, HNRNPH1, SNRPF, CSTF1, NOVA1	1104	153	13528	1.68187	1	0.413169	35.5106
GOTERM_BP_FAT	GO:0000375~RNA splicing, via transesterification reactions	21	1.48305	0.0238221	SRPK2, DHX9, EFTUD2, SNRPB2, YTHDC1, MBNL1, POLR2C, POLR2B, SFRS3, PAPOLA, PRPF8, DNAJC8, SNRNP200, SNRPC, HNRNPC, LSM2, SNRNP70, HNRNPH1, SNRPF, CSTF1, NOVA1	1104	153	13528	1.68187	1	0.413169	35.5106
GOTERM_BP_FAT	GO:0000398~nuclear mRNA splicing, via spliceosome	21	1.48305	0.0238221	SRPK2, DHX9, EFTUD2, SNRPB2, YTHDC1, MBNL1, POLR2C, POLR2B, SFRS3, PAPOLA, PRPF8, DNAJC8, SNRNP200, SNRPC, HNRNPC, LSM2, SNRNP70, HNRNPH1, SNRPF, CSTF1, NOVA1	1104	153	13528	1.68187	1	0.413169	35.5106
Annotation Cluster 11	Enrichment Score: 2.334331755428558
Category	Term	Count	%	PValue	Genes	List Total	Pop Hits	Pop Total	Fold Enrichment	Bonferroni	Benjamini	FDR
GOTERM_BP_FAT	GO:0006487~protein amino acid N-linked glycosylation	12	0.847458	0.000626802	MGAT4B, STT3B, TUSC3, LIPA, STT3A, DAD1, DPAGT1, ST8SIA3, CD4, MGAT5, ALG8, DDOST	1104	44	13528	3.3419	0.873224	0.0573022	1.13429
GOTERM_BP_FAT	GO:0009100~glycoprotein metabolic process	30	2.11864	0.00196269	GALNT2, TUSC3, APH1A, LDLR, ADAMTS13, ST8SIA3, ALG8, STT3B, POMT2, ST6GALNAC4, STT3A, DAD1, CD4, OGT, MAN2B1, PCSK6, COL11A1, DDOST, MGAT4B, KLK6, CLN3, LIPA, DPAGT1, NCSTN, PSEN1, EXT1, MGAT5, EXT2, GALNT9, COG2	1104	202	13528	1.81985	0.998453	0.111004	3.51133
GOTERM_BP_FAT	GO:0070085~glycosylation	20	1.41243	0.0076827	MGAT4B, GALNT2, TUSC3, LIPA, LDLR, DPAGT1, ST8SIA3, ALG8, STT3B, POMT2, ST6GALNAC4, STT3A, PSEN1, DAD1, CD4, OGT, MGAT5, DDOST, GALNT9, COG2	1104	128	13528	1.91463	1	0.230414	13.092
GOTERM_BP_FAT	GO:0006486~protein amino acid glycosylation	20	1.41243	0.0076827	MGAT4B, GALNT2, TUSC3, LIPA, LDLR, DPAGT1, ST8SIA3, ALG8, STT3B, POMT2, ST6GALNAC4, STT3A, PSEN1, DAD1, CD4, OGT, MGAT5, DDOST, GALNT9, COG2	1104	128	13528	1.91463	1	0.230414	13.092
GOTERM_BP_FAT	GO:0043413~biopolymer glycosylation	20	1.41243	0.0076827	MGAT4B, GALNT2, TUSC3, LIPA, LDLR, DPAGT1, ST8SIA3, ALG8, STT3B, POMT2, ST6GALNAC4, STT3A, PSEN1, DAD1, CD4, OGT, MGAT5, DDOST, GALNT9, COG2	1104	128	13528	1.91463	1	0.230414	13.092
GOTERM_BP_FAT	GO:0009101~glycoprotein biosynthetic process	22	1.55367	0.0176802	MGAT4B, GALNT2, TUSC3, LIPA, LDLR, DPAGT1, ST8SIA3, ALG8, STT3B, POMT2, ST6GALNAC4, STT3A, PSEN1, DAD1, CD4, OGT, MGAT5, EXT1, EXT2, DDOST, GALNT9, COG2	1104	158	13528	1.7062	1	0.368122	27.715
Annotation Cluster 12	Enrichment Score: 2.1331603210560286
Category	Term	Count	%	PValue	Genes	List Total	Pop Hits	Pop Total	Fold Enrichment	Bonferroni	Benjamini	FDR
GOTERM_BP_FAT	GO:0006917~induction of apoptosis	43	3.03672	0.00141089	APH1A, TNFRSF25, TUBB2C, TGFB3, MLH1, CRADD, PRUNE2, CUL2, MAP3K5, APP, APOE, TIAM1, AEN, SOS1, TGM2, NDUFS3, MX1, CUL1, NET1, HIP1, ERCC2, ARHGEF4, ARHGEF7, SMAD3, TRIO, MAL, SAP30BP, RPS3P3, ARHGEF12, STAT1, C14ORF153, DAPK1, NCSTN, NOTCH2, NME3, RASGRF2, PSEN1, RASGRF1, TIAL1, RIPK1, SORT1, MAPK8, ABL1	1104	320	13528	1.64658	0.990445	0.0981885	2.53609
GOTERM_BP_FAT	GO:0012502~induction of programmed cell death	43	3.03672	0.00149059	APH1A, TNFRSF25, TUBB2C, TGFB3, MLH1, CRADD, PRUNE2, CUL2, MAP3K5, APP, APOE, TIAM1, AEN, SOS1, TGM2, NDUFS3, MX1, CUL1, NET1, HIP1, ERCC2, ARHGEF4, ARHGEF7, SMAD3, TRIO, MAL, SAP30BP, RPS3P3, ARHGEF12, STAT1, C14ORF153, DAPK1, NCSTN, NOTCH2, NME3, RASGRF2, PSEN1, RASGRF1, TIAL1, RIPK1, SORT1, MAPK8, ABL1	1104	321	13528	1.64145	0.992655	0.101312	2.67754
GOTERM_BP_FAT	GO:0043065~positive regulation of apoptosis	54	3.81356	0.00156077	PDIA3, TUBB2C, TGFB3, MLH1, CRADD, CUL2, APP, MAP3K5, DYNLL1, TIAM1, APOE, AEN, NDUFS3, MX1, CUL1, NET1, ARHGEF4, ARHGEF7, GRIN2A, RPS3P3, ARHGEF12, CDK5, DAPK1, NME3, RASGRF2, PSEN1, RASGRF1, RIPK1, TIAL1, SORT1, MAPK8, APH1A, TNFRSF25, NR3C1, SCRIB, PRUNE2, SOS1, TGM2, DNAJA3, HIP1, ERCC2, NF1, GRIN1, SMAD3, TRIO, MAL, SAP30BP, STAT1, C14ORF153, NCSTN, NOTCH2, NOTCH1, ABL1, DNM2	1104	430	13528	1.53883	0.994173	0.103693	2.80191
GOTERM_BP_FAT	GO:0042981~regulation of apoptosis	90	6.35593	0.00170048	MAEA, PDIA3, WFS1, TUBB2C, JAG2, TGFB3, MLH1, CIAPIN1, CRADD, KCNIP3, EDNRB, CUL2, PAK7, MAP3K5, APP, DYNLL1, TIAM1, APOE, AEN, PIK3CA, CAT, DLG5, NDUFS3, MX1, MKL1, CUL1, NET1, ARHGEF4, DEPDC6, CLN3, ARHGEF7, MADD, RELA, GRIN2A, RPS3P3, ARHGEF12, CDK5, DAPK1, GRM4, NME3, PSEN1, RASGRF2, RASGRF1, TIAL1, RIPK1, CSTB, SORT1, MAPK8, CTSB, FAIM2, GCLC, CCL2, APH1A, TNFRSF25, ERBB2, TAF9B, NFKBIA, NR3…	1104	804	13528	1.37167	0.996325	0.106066	3.04907
GOTERM_BP_FAT	GO:0010941~regulation of cell death	91	6.42655	0.00171017	MAEA, PDIA3, WFS1, TUBB2C, JAG2, TGFB3, MLH1, CIAPIN1, CRADD, KCNIP3, EDNRB, CUL2, PAK7, MAP3K5, APP, DYNLL1, TIAM1, APOE, AEN, PIK3CA, CAT, DLG5, NDUFS3, MX1, MKL1, CUL1, NET1, ARHGEF4, DEPDC6, CLN3, SLC25A4, ARHGEF7, MADD, RELA, GRIN2A, RPS3P3, ARHGEF12, CDK5, DAPK1, GRM4, NME3, PSEN1, RASGRF2, RASGRF1, TIAL1, RIPK1, CSTB, SORT1, MAPK8, CTSB, FAIM2, GCLC, CCL2, APH1A, TNFRSF25, ERBB2, TAF9B, NF…	1104	815	13528	1.3682	0.996441	0.102754	3.0662
GOTERM_BP_FAT	GO:0043068~positive regulation of programmed cell death	54	3.81356	0.00182228	PDIA3, TUBB2C, TGFB3, MLH1, CRADD, CUL2, APP, MAP3K5, DYNLL1, TIAM1, APOE, AEN, NDUFS3, MX1, CUL1, NET1, ARHGEF4, ARHGEF7, GRIN2A, RPS3P3, ARHGEF12, CDK5, DAPK1, NME3, RASGRF2, PSEN1, RASGRF1, RIPK1, TIAL1, SORT1, MAPK8, APH1A, TNFRSF25, NR3C1, SCRIB, PRUNE2, SOS1, TGM2, DNAJA3, HIP1, ERCC2, NF1, GRIN1, SMAD3, TRIO, MAL, SAP30BP, STAT1, C14ORF153, NCSTN, NOTCH2, NOTCH1, ABL1, DNM2	1104	433	13528	1.52817	0.997541	0.107171	3.26406
GOTERM_BP_FAT	GO:0010942~positive regulation of cell death	54	3.81356	0.00201625	PDIA3, TUBB2C, TGFB3, MLH1, CRADD, CUL2, APP, MAP3K5, DYNLL1, TIAM1, APOE, AEN, NDUFS3, MX1, CUL1, NET1, ARHGEF4, ARHGEF7, GRIN2A, RPS3P3, ARHGEF12, CDK5, DAPK1, NME3, RASGRF2, PSEN1, RASGRF1, RIPK1, TIAL1, SORT1, MAPK8, APH1A, TNFRSF25, NR3C1, SCRIB, PRUNE2, SOS1, TGM2, DNAJA3, HIP1, ERCC2, NF1, GRIN1, SMAD3, TRIO, MAL, SAP30BP, STAT1, C14ORF153, NCSTN, NOTCH2, NOTCH1, ABL1, DNM2	1104	435	13528	1.52114	0.998704	0.110091	3.60551
GOTERM_BP_FAT	GO:0043067~regulation of programmed cell death	90	6.35593	0.00225484	MAEA, PDIA3, WFS1, TUBB2C, JAG2, TGFB3, MLH1, CIAPIN1, CRADD, KCNIP3, EDNRB, CUL2, PAK7, MAP3K5, APP, DYNLL1, TIAM1, APOE, AEN, PIK3CA, CAT, DLG5, NDUFS3, MX1, MKL1, CUL1, NET1, ARHGEF4, DEPDC6, CLN3, ARHGEF7, MADD, RELA, GRIN2A, RPS3P3, ARHGEF12, CDK5, DAPK1, GRM4, NME3, PSEN1, RASGRF2, RASGRF1, TIAL1, RIPK1, CSTB, SORT1, MAPK8, CTSB, FAIM2, GCLC, CCL2, APH1A, TNFRSF25, ERBB2, TAF9B, NFKBIA, NR3…	1104	812	13528	1.35816	0.99941	0.114762	4.02392
GOTERM_BP_FAT	GO:0016265~death	81	5.72034	0.00297535	FASTKD2, ATP6AP1, CIAPIN1, CRADD, KCNIP3, MAP3K5, APP, UNC5B, DYNLL1, TIAM1, TARDBP, AEN, CLUL1, MMD2, PAK1, CUL1, NET1, CIB1, ARHGEF4, CLN3, SGK1, OPA1, MADD, KIF5A, OPTN, RPS3P3, ARHGEF12, CDK5, DCTN1, DAPK1, BCAP31, NME3, ZDHHC16, RASGRF2, PSEN1, RASGRF1, TIAL1, RIPK1, PKM2, MAPK8, FAIM2, PACS2, APH1A, TNFRSF25, TAF9B, KIAA0196, NFKBIA, SCRIB, APLP1, SLC11A2, PRUNE2, TSC22D3, PTK2B, SOS1, TMEM…	1104	724	13528	1.37092	0.999945	0.140158	5.27714
GOTERM_BP_FAT	GO:0008219~cell death	80	5.64972	0.003657	FASTKD2, ATP6AP1, CIAPIN1, CRADD, KCNIP3, MAP3K5, APP, UNC5B, DYNLL1, TIAM1, TARDBP, AEN, CLUL1, MMD2, PAK1, CUL1, NET1, CIB1, ARHGEF4, CLN3, SGK1, OPA1, MADD, KIF5A, OPTN, RPS3P3, ARHGEF12, CDK5, DCTN1, DAPK1, BCAP31, NME3, ZDHHC16, RASGRF2, PSEN1, RASGRF1, TIAL1, RIPK1, PKM2, MAPK8, FAIM2, PACS2, APH1A, TNFRSF25, TAF9B, KIAA0196, NFKBIA, SCRIB, APLP1, SLC11A2, PRUNE2, TSC22D3, PTK2B, SOS1, TMEM…	1104	719	13528	1.36341	0.999994	0.15432	6.44849
GOTERM_BP_FAT	GO:0008624~induction of apoptosis by extracellular signals	18	1.27119	0.00909748	ARHGEF4, APH1A, ARHGEF7, TNFRSF25, TRIO, ARHGEF12, CRADD, DAPK1, NCSTN, MAP3K5, PSEN1, RASGRF2, TIAM1, RASGRF1, SOS1, SORT1, MAPK8, NET1	1104	112	13528	1.96933	1	0.253436	15.319
GOTERM_BP_FAT	GO:0012501~programmed cell death	65	4.5904	0.0218923	FASTKD2, CIAPIN1, CRADD, KCNIP3, MAP3K5, APP, DYNLL1, UNC5B, TIAM1, AEN, PAK1, CUL1, NET1, CIB1, ARHGEF4, SGK1, OPA1, MADD, RPS3P3, ARHGEF12, CDK5, DAPK1, BCAP31, NME3, ZDHHC16, RASGRF2, PSEN1, RASGRF1, TIAL1, RIPK1, PKM2, MAPK8, FAIM2, PACS2, APH1A, TNFRSF25, TAF9B, NFKBIA, SCRIB, APLP1, SLC11A2, PRUNE2, TSC22D3, PTK2B, SOS1, DAD1, TGM2, DNAJA3, HIP1, AATK, ERCC2, TMBIM6, SMAD3, RAF1, TRIO, SAP3…	1104	611	13528	1.30358	1	0.401591	33.1512
GOTERM_BP_FAT	GO:0060548~negative regulation of cell death	40	2.82486	0.0409994	GCLC, MAEA, CCL2, WFS1, ERBB2, TAF9B, TGFB3, NFKBIA, GCLM, CIAPIN1, PAK7, EDNRB, ERCC5, APOE, TGM2, DAD1, PIK3CA, CAT, PCSK6, MKL1, ERCC1, DNAJA3, ERCC2, CLN3, SLC25A4, BECN1, RELA, TMBIM6, GRIN1, NR4A2, SMAD3, DAPK1, NOTCH2, NOTCH1, HDAC3, PSEN1, SORT1, MAPK8, FAIM2, CACNA1A	1104	360	13528	1.36151	1	0.523549	53.3116
GOTERM_BP_FAT	GO:0006915~apoptosis	62	4.37853	0.0443799	FASTKD2, CIAPIN1, CRADD, KCNIP3, MAP3K5, APP, DYNLL1, UNC5B, TIAM1, AEN, PAK1, CUL1, NET1, CIB1, ARHGEF4, SGK1, OPA1, MADD, RPS3P3, ARHGEF12, CDK5, DAPK1, BCAP31, ZDHHC16, NME3, RASGRF2, PSEN1, RASGRF1, TIAL1, RIPK1, MAPK8, FAIM2, PACS2, APH1A, TNFRSF25, NFKBIA, SCRIB, APLP1, SLC11A2, PRUNE2, TSC22D3, PTK2B, SOS1, DAD1, DNAJA3, HIP1, AATK, ERCC2, TMBIM6, SMAD3, TRIO, RAF1, SAP30BP, STAT1, FXR1, N…	1104	602	13528	1.262	1	0.541046	56.2169
GOTERM_BP_FAT	GO:0043066~negative regulation of apoptosis	39	2.75424	0.0485541	GCLC, MAEA, CCL2, WFS1, ERBB2, TAF9B, TGFB3, NFKBIA, GCLM, CIAPIN1, PAK7, EDNRB, ERCC5, APOE, TGM2, DAD1, PIK3CA, CAT, PCSK6, MKL1, ERCC1, DNAJA3, ERCC2, CLN3, BECN1, RELA, TMBIM6, GRIN1, NR4A2, SMAD3, DAPK1, NOTCH2, NOTCH1, HDAC3, PSEN1, SORT1, MAPK8, FAIM2, CACNA1A	1104	354	13528	1.34998	1	0.555869	59.5688
GOTERM_BP_FAT	GO:0043069~negative regulation of programmed cell death	39	2.75424	0.058204	GCLC, MAEA, CCL2, WFS1, ERBB2, TAF9B, TGFB3, NFKBIA, GCLM, CIAPIN1, PAK7, EDNRB, ERCC5, APOE, TGM2, DAD1, PIK3CA, CAT, PCSK6, MKL1, ERCC1, DNAJA3, ERCC2, CLN3, BECN1, RELA, TMBIM6, GRIN1, NR4A2, SMAD3, DAPK1, NOTCH2, NOTCH1, HDAC3, PSEN1, SORT1, MAPK8, FAIM2, CACNA1A	1104	359	13528	1.33117	1	0.589252	66.4134
GOTERM_BP_FAT	GO:0006916~anti-apoptosis	17	1.20056	0.618274	CCL2, GCLC, BECN1, RELA, NFKBIA, CIAPIN1, DAPK1, NOTCH2, PAK7, HDAC3, PSEN1, APOE, DAD1, TGM2, PIK3CA, MKL1, FAIM2	1104	206	13528	1.01122	1	0.993804	100
Annotation Cluster 13	Enrichment Score: 1.9222436644648362
Category	Term	Count	%	PValue	Genes	List Total	Pop Hits	Pop Total	Fold Enrichment	Bonferroni	Benjamini	FDR
GOTERM_BP_FAT	GO:0032940~secretion by cell	30	2.11864	0.0028395	LTBP4, CAMK2G, RABEPK, ARFGEF1, RIMS1, MIA3, ANK1, HRH3, SYN3, RAPGEF4, PCSK6, SDF4, APBA1, EXOC2, SEC61A2, SCAMP1, SMAD2, STXBP3, CDK5, GRM4, SCFD1, DOC2A, CADPS2, PSEN1, NTRK2, RAB14, GNAS, UNC13A, CACNA1A, MYH10	1104	207	13528	1.77589	0.999914	0.136147	5.04203
GOTERM_BP_FAT	GO:0006887~exocytosis	18	1.27119	0.0117437	SCAMP1, RABEPK, STXBP3, RIMS1, ARFGEF1, CDK5, SCFD1, MIA3, DOC2A, ANK1, PSEN1, CADPS2, RAPGEF4, SDF4, CACNA1A, EXOC2, UNC13A, MYH10	1104	115	13528	1.91796	1	0.29571	19.3403
GOTERM_BP_FAT	GO:0003001~generation of a signal involved in cell-cell signaling	14	0.988701	0.0197302	LTBP4, CAMK2G, SMAD2, RIMS1, GRM4, DOC2A, HRH3, PSEN1, SYN3, NTRK2, RAB14, RAPGEF4, APBA1, CACNA1A	1104	85	13528	2.01824	1	0.382858	30.4111
GOTERM_BP_FAT	GO:0046903~secretion	35	2.47175	0.0311062	COPA, PTGES2, TRPV1, TACR2, LTBP4, CAMK2G, RABEPK, RIMS1, ARFGEF1, MIA3, ANK1, HRH3, SYN3, RAPGEF4, PCSK6, SDF4, EXOC2, APBA1, SEC61A2, SCAMP1, SMAD2, STXBP3, GRHPR, CDK5, GRM4, SCFD1, DOC2A, CADPS2, PSEN1, NTRK2, RAB14, GNAS, UNC13A, CACNA1A, MYH10	1104	300	13528	1.42959	1	0.469907	43.7262
Annotation Cluster 14	Enrichment Score: 1.7295217444749165
Category	Term	Count	%	PValue	Genes	List Total	Pop Hits	Pop Total	Fold Enrichment	Bonferroni	Benjamini	FDR
GOTERM_BP_FAT	GO:0030705~cytoskeleton-dependent intracellular transport	11	0.776836	0.00840768	MYL6, DYNC1I1, MYO5A, APP, KIF1A, KIF3B, KIF1B, OPA1, MYH9, APBA1, MYH10	1104	52	13528	2.59211	1	0.242794	14.24
GOTERM_BP_FAT	GO:0007018~microtubule-based movement	18	1.27119	0.0099205	DYNC1I1, KIF3B, OPA1, KIF5A, DNAH17, TUBB2C, BICD2, KIF1C, KIF1A, APP, KIF1B, TUBE1, KIF21A, DYNC1H1, KIF21B, TUBA1B, APBA1, KIF2A	1104	113	13528	1.9519	1	0.262203	16.5896
GOTERM_BP_FAT	GO:0008088~axon cargo transport	6	0.423729	0.0124635	APP, KIF1A, KIF3B, KIF1B, OPA1, APBA1	1104	18	13528	4.08454	1	0.30848	20.4025
GOTERM_BP_FAT	GO:0010970~microtubule-based transport	7	0.49435	0.0271008	DYNC1I1, APP, KIF1A, KIF3B, KIF1B, OPA1, APBA1	1104	29	13528	2.95777	1	0.446512	39.3397
GOTERM_BP_FAT	GO:0008089~anterograde axon cargo transport	3	0.211864	0.0799026	KIF1A, KIF3B, KIF1B	1104	6	13528	6.12681	1	0.675095	78.0222
Annotation Cluster 15	Enrichment Score: 1.7049517094157323
Category	Term	Count	%	PValue	Genes	List Total	Pop Hits	Pop Total	Fold Enrichment	Bonferroni	Benjamini	FDR
GOTERM_BP_FAT	GO:0000956~nuclear-transcribed mRNA catabolic process	9	0.635593	0.00614033	EXOSC10, UPF1, EIF2C1, SMG6, EIF3E, SMG7, MLH1, C19ORF61, KIAA0427	1104	35	13528	3.15093	1	0.208007	10.6012
GOTERM_BP_FAT	GO:0006402~mRNA catabolic process	9	0.635593	0.021251	EXOSC10, UPF1, EIF2C1, SMG6, EIF3E, SMG7, MLH1, C19ORF61, KIAA0427	1104	43	13528	2.56471	1	0.394567	32.3493
GOTERM_BP_FAT	GO:0000184~nuclear-transcribed mRNA catabolic process, nonsense-mediated decay	7	0.49435	0.0316154	EXOSC10, UPF1, SMG6, EIF3E, SMG7, C19ORF61, KIAA0427	1104	30	13528	2.85918	1	0.471381	44.2618
GOTERM_BP_FAT	GO:0006401~RNA catabolic process	11	0.776836	0.0367049	RNASEN, EXOSC10, UPF1, EIF2C1, SMG6, EIF3E, SMG7, PABPC4, MLH1, C19ORF61, KIAA0427	1104	65	13528	2.07369	1	0.495576	49.3576
Annotation Cluster 16	Enrichment Score: 1.6215144156837265
Category	Term	Count	%	PValue	Genes	List Total	Pop Hits	Pop Total	Fold Enrichment	Bonferroni	Benjamini	FDR
GOTERM_BP_FAT	GO:0033692~cellular polysaccharide biosynthetic process	8	0.564972	0.00388927	GBE1, NANS, GNE, CMAS, MAT2B, CERCAM, EXT1, EXT2	1104	26	13528	3.77035	0.999997	0.157305	6.84451
GOTERM_BP_FAT	GO:0044264~cellular polysaccharide metabolic process	11	0.776836	0.00962606	PHKA2, GBE1, NANS, GNE, CMAS, GAA, MAT2B, CERCAM, EXT1, PPP1CB, EXT2	1104	53	13528	2.5432	1	0.259614	16.1371
GOTERM_BP_FAT	GO:0016051~carbohydrate biosynthetic process	17	1.20056	0.0128223	GPD2, GNE, CMAS, DPAGT1, CERCAM, GPI, NANS, GBE1, CHST10, GFPT1, ENO2, MAT2B, EXT1, EXT2, UGP2, PC, COG2	1104	107	13528	1.94684	1	0.309025	20.9271
GOTERM_BP_FAT	GO:0009103~lipopolysaccharide biosynthetic process	4	0.282486	0.0147368	NANS, GNE, CMAS, CERCAM	1104	7	13528	7.00207	1	0.330253	23.6712
GOTERM_BP_FAT	GO:0008653~lipopolysaccharide metabolic process	4	0.282486	0.0221658	NANS, GNE, CMAS, CERCAM	1104	8	13528	6.12681	1	0.403294	33.4905
GOTERM_BP_FAT	GO:0034637~cellular carbohydrate biosynthetic process	12	0.847458	0.0230991	GPD2, GPI, GBE1, NANS, GNE, CMAS, ENO2, MAT2B, CERCAM, EXT1, EXT2, PC	1104	69	13528	2.13106	1	0.407663	34.636
GOTERM_BP_FAT	GO:0000271~polysaccharide biosynthetic process	8	0.564972	0.0701901	GBE1, NANS, GNE, CMAS, MAT2B, CERCAM, EXT1, EXT2	1104	45	13528	2.17842	1	0.641006	73.3954
GOTERM_BP_FAT	GO:0005976~polysaccharide metabolic process	11	0.776836	0.419415	PHKA2, GBE1, NANS, GNE, CMAS, GAA, MAT2B, CERCAM, EXT1, PPP1CB, EXT2	1104	111	13528	1.21432	1	0.97077	99.9949
Annotation Cluster 17	Enrichment Score: 1.5513972655708554
Category	Term	Count	%	PValue	Genes	List Total	Pop Hits	Pop Total	Fold Enrichment	Bonferroni	Benjamini	FDR
GOTERM_BP_FAT	GO:0015980~energy derivation by oxidation of organic compounds	23	1.62429	0.00303587	NDUFB3, PHKA2, ME3, NDUFB10, ACO2, ALDH5A1, NDUFC1, NDUFA10, PPP1CB, NDUFB2, SDHA, NNT, GBE1, NDUFS4, GFPT1, DLD, GAA, IDH1, GNAS, CAT, NDUFS3, SUCLA2, UQCRB	1104	144	13528	1.95718	0.999955	0.138847	5.38169
GOTERM_BP_FAT	GO:0045333~cellular respiration	17	1.20056	0.0050272	NDUFB3, ME3, NDUFB10, ACO2, ALDH5A1, NDUFC1, NDUFA10, NDUFB2, SDHA, NNT, NDUFS4, DLD, IDH1, CAT, NDUFS3, SUCLA2, UQCRB	1104	97	13528	2.14754	1	0.185316	8.7618
GOTERM_BP_FAT	GO:0006091~generation of precursor metabolites and energy	40	2.82486	0.00509322	NDUFB3, PHKA2, ACOX1, ME3, ECH1, ATP6AP1, OGDHL, UQCRQ, NDUFB2, UEVLD, NDUFS4, ENO2, ATP5L, IDH1, CAT, NDUFS3, SUCLA2, NDUFB11, NDUFB10, ACO2, SLC25A4, ALDH5A1, PFKP, ATP6V1H, PFKM, NDUFC1, NDUFA10, ATP6V1D, PPP1CB, MON2, SDHA, GPI, NNT, GBE1, PKM2, GFPT1, DLD, GAA, GNAS, UQCRB	1104	313	13528	1.56596	1	0.185451	8.87188
GOTERM_BP_FAT	GO:0022904~respiratory electron transport chain	11	0.776836	0.0334014	SDHA, NDUFB3, NDUFS4, NDUFB10, ALDH5A1, DLD, NDUFC1, NDUFS3, NDUFA10, UQCRB, NDUFB2	1104	64	13528	2.10609	1	0.484259	46.1028
GOTERM_BP_FAT	GO:0006120~mitochondrial electron transport, NADH to ubiquinone	8	0.564972	0.0514062	NDUFB3, NDUFS4, NDUFB10, DLD, NDUFC1, NDUFS3, NDUFA10, NDUFB2	1104	42	13528	2.33402	1	0.569962	61.7181
GOTERM_BP_FAT	GO:0006119~oxidative phosphorylation	14	0.988701	0.0546223	NDUFB3, NDUFB10, ATP6AP1, ATP6V1H, NDUFC1, NDUFA10, ATP6V1D, MON2, NDUFB2, NDUFS4, DLD, ATP5L, NDUFS3, UQCRB	1104	98	13528	1.75052	1	0.58049	64.0119
GOTERM_BP_FAT	GO:0042775~mitochondrial ATP synthesis coupled electron transport	9	0.635593	0.0828052	NDUFB3, NDUFS4, NDUFB10, DLD, NDUFC1, NDUFS3, NDUFA10, UQCRB, NDUFB2	1104	56	13528	1.96933	1	0.682747	79.25
GOTERM_BP_FAT	GO:0042773~ATP synthesis coupled electron transport	9	0.635593	0.0828052	NDUFB3, NDUFS4, NDUFB10, DLD, NDUFC1, NDUFS3, NDUFA10, UQCRB, NDUFB2	1104	56	13528	1.96933	1	0.682747	79.25
GOTERM_BP_FAT	GO:0022900~electron transport chain	13	0.918079	0.218051	NDUFB3, NDUFB11, NDUFB10, ALDH5A1, NDUFC1, NDUFA10, UQCRQ, NDUFB2, SDHA, NDUFS4, DLD, NDUFS3, UQCRB	1104	114	13528	1.39734	1	0.894663	98.8611
Annotation Cluster 18	Enrichment Score: 1.4175499200880777
Category	Term	Count	%	PValue	Genes	List Total	Pop Hits	Pop Total	Fold Enrichment	Bonferroni	Benjamini	FDR
GOTERM_BP_FAT	GO:0007269~neurotransmitter secretion	8	0.564972	0.0179848	GRM4, DOC2A, PSEN1, HRH3, SYN3, RAB14, RIMS1, CACNA1A	1104	34	13528	2.88321	1	0.368624	28.1217
GOTERM_BP_FAT	GO:0003001~generation of a signal involved in cell-cell signaling	14	0.988701	0.0197302	LTBP4, CAMK2G, SMAD2, RIMS1, GRM4, DOC2A, HRH3, PSEN1, SYN3, NTRK2, RAB14, RAPGEF4, APBA1, CACNA1A	1104	85	13528	2.01824	1	0.382858	30.4111
GOTERM_BP_FAT	GO:0001505~regulation of neurotransmitter levels	11	0.776836	0.0439763	GRM4, CLN3, DOC2A, SLC25A4, PSEN1, HRH3, ALDH5A1, SYN3, RAB14, RIMS1, CACNA1A	1104	67	13528	2.01179	1	0.539572	55.8792
GOTERM_BP_FAT	GO:0006836~neurotransmitter transport	11	0.776836	0.136945	GRM4, DOC2A, SLC25A4, PSEN1, HRH3, SLC6A7, SLC6A11, SYN3, RAB14, RIMS1, CACNA1A	1104	83	13528	1.62397	1	0.803668	93.1408
Annotation Cluster 19	Enrichment Score: 1.4030833886323382
Category	Term	Count	%	PValue	Genes	List Total	Pop Hits	Pop Total	Fold Enrichment	Bonferroni	Benjamini	FDR
GOTERM_BP_FAT	GO:0016568~chromatin modification	39	2.75424	0.000845696	CBX3, NR3C1, CBX7, EPC1, EPC2, BRPF1, TAF5L, TSPYL2, USP16, BRD8, CHD3, SETDB1, AEBP2, SATB2, EHMT1, L3MBTL, SMYD3, WHSC1, ARID1A, RB1, ARID1B, UBE2B, ATXN7L3, SUV420H2, RPS6KA5, HDAC5, PHF17, HDAC3, KDM2A, JMJD6, SMARCC1, PHF15, RUVBL2, JMJD1C, HDAC8, SRCAP, SMARCA2, EP400, SMARCA4	1104	274	13528	1.74413	0.938388	0.0673008	1.52754
GOTERM_BP_FAT	GO:0016569~covalent chromatin modification	19	1.34181	0.0136043	EHMT1, UBE2B, ATXN7L3, SUV420H2, RPS6KA5, HDAC5, EPC1, PHF17, HDAC3, TAF5L, BRPF1, JMJD6, PHF15, RUVBL2, USP16, HDAC8, EP400, SMARCA4, BRD8	1104	126	13528	1.84777	1	0.319986	22.059
GOTERM_BP_FAT	GO:0043967~histone H4 acetylation	6	0.423729	0.0196891	EPC1, PHF17, PHF15, RUVBL2, EP400, BRD8	1104	20	13528	3.67609	1	0.38443	30.3579
GOTERM_BP_FAT	GO:0016570~histone modification	18	1.27119	0.0202781	EHMT1, UBE2B, ATXN7L3, SUV420H2, RPS6KA5, HDAC5, EPC1, PHF17, HDAC3, TAF5L, BRPF1, JMJD6, PHF15, RUVBL2, USP16, HDAC8, EP400, BRD8	1104	122	13528	1.80791	1	0.386764	31.1153
GOTERM_BP_FAT	GO:0051276~chromosome organization	52	3.67232	0.0355842	ARID4A, CBX3, CBX7, EPC1, BRPF1, TAF5L, EPC2, SEH1L, USP16, BRD8, SATB2, ARID1A, RB1, ARID1B, UBE2B, NCAPD3, SUV420H2, RFC1, KDM2A, RUVBL2, JMJD1C, AKAP8, SRCAP, SMARCA2, EP400, SMARCA4, NR3C1, RPA1, TSPYL2, ACD, NCAPG2, ERCC1, CHD3, SETDB1, AEBP2, EHMT1, PDS5B, SMG6, L3MBTL, SMYD3, WHSC1, ATXN7L3, RPS6KA5, HDAC5, PHF17, HDAC3, JMJD6, SMARCC1, PHF15, SUPT16H, HDAC8, MPHOSPH8	1104	485	13528	1.31379	1	0.498367	48.2748
GOTERM_BP_FAT	GO:0006325~chromatin organization	42	2.9661	0.0363815	ARID4A, CBX3, NR3C1, CBX7, EPC1, EPC2, BRPF1, TAF5L, TSPYL2, USP16, BRD8, CHD3, SETDB1, AEBP2, SATB2, EHMT1, L3MBTL, SMYD3, WHSC1, ARID1A, RB1, ARID1B, UBE2B, ATXN7L3, SUV420H2, RPS6KA5, HDAC5, PHF17, HDAC3, KDM2A, JMJD6, SMARCC1, PHF15, SUPT16H, RUVBL2, JMJD1C, HDAC8, SRCAP, SMARCA2, MPHOSPH8, EP400, SMARCA4	1104	378	13528	1.36151	1	0.496321	49.0474
GOTERM_BP_FAT	GO:0043968~histone H2A acetylation	4	0.282486	0.068209	EPC1, RUVBL2, EP400, BRD8	1104	12	13528	4.08454	1	0.63643	72.3449
GOTERM_BP_FAT	GO:0016573~histone acetylation	8	0.564972	0.0925637	EPC1, PHF17, BRPF1, TAF5L, PHF15, RUVBL2, EP400, BRD8	1104	48	13528	2.04227	1	0.713442	82.9196
GOTERM_BP_FAT	GO:0006473~protein amino acid acetylation	8	0.564972	0.127843	EPC1, PHF17, BRPF1, TAF5L, PHF15, RUVBL2, EP400, BRD8	1104	52	13528	1.88517	1	0.787404	91.6983
GOTERM_BP_FAT	GO:0043543~protein amino acid acylation	8	0.564972	0.214868	EPC1, PHF17, BRPF1, TAF5L, PHF15, RUVBL2, EP400, BRD8	1104	60	13528	1.63382	1	0.89403	98.7738
GOTERM_BP_FAT	GO:0043966~histone H3 acetylation	4	0.282486	0.357001	PHF17, BRPF1, TAF5L, PHF15	1104	26	13528	1.88517	1	0.956503	99.9676
Annotation Cluster 20	Enrichment Score: 1.3858211899976272
Category	Term	Count	%	PValue	Genes	List Total	Pop Hits	Pop Total	Fold Enrichment	Bonferroni	Benjamini	FDR
GOTERM_BP_FAT	GO:0043631~RNA polyadenylation	5	0.353107	0.0226833	APP, PAPOLA, PAPD4, CSTF1, APLP1	1104	14	13528	4.37629	1	0.406215	34.1281
GOTERM_BP_FAT	GO:0031124~mRNA 3'-end processing	5	0.353107	0.0362149	APP, PAPOLA, MLH1, CSTF1, APLP1	1104	16	13528	3.82926	1	0.496651	48.8868
GOTERM_BP_FAT	GO:0006378~mRNA polyadenylation	4	0.282486	0.0543532	APP, PAPOLA, CSTF1, APLP1	1104	11	13528	4.45586	1	0.582078	63.825
GOTERM_BP_FAT	GO:0031123~RNA 3'-end processing	6	0.423729	0.0641056	APP, PAPOLA, PAPD4, MLH1, CSTF1, APLP1	1104	27	13528	2.72303	1	0.61764	70.0432
The NCBI tool, DAVID, was used to investigate functional associations of gene expression changes seen in AD temporal lobe. There were 1416 genes that were more than two-fold over- or under-expressed in AD relative to normal temporal lobe and these were analysed by the functional clustering tool. Gene Ontology Biological Process was selected as the annotation category for clustering. Once the tool…
